# Supplementary material
Source: PubMed Central journal article supplement (PMC11162332)
Supplement: NIHMS1988689-supplement-Supplemental_info.pdf [file NIHMS1988689-supplement-Supplemental_info.pdf]

# Supplementary Information

## A synthetic cationic helical polypeptide as a multipotent innate immune activator for cancer immunotherapy

DaeYong Lee,<sup>1,2\*</sup> Kristin Huntoon,<sup>1,2\*</sup> Yifan Wang,<sup>3\*</sup> Minjeong Kang,<sup>3</sup> Yifei Lu,<sup>1,2</sup> Seong Dong Jeong,<sup>1,2</sup> Todd M. Link,<sup>4</sup> Thomas D. Gallup<sup>1,2</sup>, Yaqing Qie,<sup>1,2</sup> Xuefeng Li,<sup>3</sup> Yifan Ma,<sup>3</sup> Shiyan Dong,<sup>3</sup> Benjamin R. Schrank,<sup>3</sup> Adam Grippin,<sup>3</sup> Abin Antony,<sup>3</sup> Jonghoon Ha,<sup>3</sup> Mengyu Chang,<sup>3</sup> Yi An,<sup>5</sup> Liang Wang,<sup>3</sup> Dadi Jiang,<sup>3</sup> Jing Li,<sup>3</sup> Albert C. Koong,<sup>3</sup> John A. Tainer,<sup>4</sup> Wen Jiang,<sup>3,#</sup> Betty Y.S. Kim<sup>1,2,#</sup>

<sup>1</sup> Department of Neurosurgery, The University of Texas MD Anderson Cancer Center, Houston, TX, USA

<sup>2</sup> Brain Tumor Center, The University of Texas MD Anderson Cancer Center, Houston, TX, USA

<sup>3</sup> Department of Radiation Oncology, The University of Texas MD Anderson Cancer Center, Houston, TX, USA

<sup>4</sup> Department of Molecular and Cellular Oncology, The University of Texas MD Anderson Cancer Center, TX, USA

<sup>5</sup> Department of Therapeutic Radiology, Yale School of Medicine, CT, USA

\*These authors contributed equally

#Corresponding authors: Dr. Wen Jiang ([wjiang4@mdanderson.org](mailto:wjiang4@mdanderson.org)) and Dr. Betty Y S Kim

([bykim@mdanderson.org](mailto:bykim@mdanderson.org))

| Contents                                   | Page numbers |
|--------------------------------------------|--------------|
| Supplementary methods                      | 2-6          |
| Supplementary figures 1-24                 | 7-23         |
| Autophagy required for TL9 activation      | 24           |
| Supplementary figures 25-37                | 24-32        |
| References                                 | 32           |
| Flow gating strategies                     | 33-53        |
| Uncropped western blot images              | 54-63        |
| Reagents and antibodies used in this study | 64-67        |

## 33 **Supplementary methods**

34

### 35 **Physical characterization**

36 All NMR spectra were measured with a Bruker 500 MHz DXR NMR Spectrometer. Deuterated  
37 dimethylsulfoxide (DMSO- $d_6$ , Sigma Aldrich, USA) and water ( $D_2O$ , Sigma Aldrich, USA) were  
38 used as NMR solvents. Molecular weights were determined by gel permeation chromatography  
39 (YL9100 HPLC system, Younglin, Korea). 0.1 M LiBr *N,N'*-dimethylformamide solution was used  
40 as a mobile phase with a 0.5 mL/min flow rate. A circular dichroism spectrometer (J-815  
41 spectropolarimeter 150 L type, JASCO, Japan) was used to determine the secondary protein  
42 conformation using a quartz cell with a 0.02 mm path length in the range of 200 to 260 nm at 25°C.  
43 The CD spectra were measured with 100 nm/min scanning, 1 nm bandwidth, 4 s response time,  
44 1.0 nm data pitch, and 10 accumulations. The polypeptide concentrations were adjusted to 1  
45 mg/mL. For pH titration curves, the polypeptide solution (1 mg/mL in deionized water) was  
46 adjusted to approximately pH 3.5, and then titrated with 0.1 N NaOH solution.

47

### 48 **Transmission electron microscopy**

49 The polypeptides (1 mg/mL in deionized water) were incubated with fetal bovine serum (FBS)  
50 (10% in deionized water), and then the nanocomplexes were negatively stained with 1% uranyl  
51 acetate solution. Stain was blotted dry from the grids with filter paper and samples were allowed  
52 to dry. Samples were then examined in a JEM 1010 transmission electron microscope (JEOL,  
53 USA, Inc., Peabody, MA) at an accelerating voltage of 80 kV. Digital images were obtained using  
54 the AMT Imaging System (Advanced Microscopy Techniques Corp., Danvers, MA).

55

### 56 **Degradability**

57 P1, P2, and P3 (10 mg/mL in PBS) were incubated with mouse serum (10% in FBS) at 37°C for  
58 24 h, and the serum protein was then removed by ethanol precipitation. Size exclusion

59 chromatography was done with untreated or serum-treated polypeptides to evaluate degradability  
60 of polypeptides.

61

## 62 **Apoptosis assay**

63 4T1, EO771 ( $2 \times 10^5$  cells/12 well plate), bone-marrow–derived macrophages (BMDMs), or bone  
64 marrow–derived dendritic cells (BMDCs) ( $5 \times 10^5$  cells/12-well plate) were treated with P1, P2,  
65 P3 (4  $\mu\text{g}/\text{mL}$ ) and lipopolysaccharide (LPS) (100  $\text{ng}/\text{mL}$ ) and valinomycin (5  $\mu\text{M}$ ) for 24 h. The  
66 cells were stained with fluorescein isothiocyanate (FITC)-annexin V and PI according to the  
67 manufacture’s protocol (Dead Cell Apoptosis Kits with Annexin V for Flow Cytometry,  
68 ThermoFisher Scientific, USA). Apoptotic events were measured by flow cytometry.

69

## 70 **Confocal laser scanning microscopy (CLSM) for staining organelles**

71 M2 BMDMs seeded on confocal dishes were dyed with Mitotracker Deep Red (400 nM,  
72 ThermoFisher Scientific, USA), ER tracker Red (100 nM, ThermoFisher Scientific, USA), or  
73 LysoTracker Deep Red (50 nM, ThermoFisher Scientific, USA) for 30 min before being treated  
74 with FITC-P1 for 3 h (mitochondria) and for 30 min, 1 h, and 3 h (lysosomes). The cells were  
75 washed with PBS three times and then fixed with a 4% paraformaldehyde solution to visualize  
76 the cells by CLSM.

77

## 78 **Immunofluorescence**

79 M2 BMDMs seeded on confocal dishes were treated with P1, LPS, or cGAMP for 1 day or with  
80 FITC-P1 for 3 h for STING (Stimulator of interferon genes) immunofluorescence. The cells were  
81 washed with PBS three times, fixed and permeabilized to stain intracellular proteins before the  
82 cells were treated with the primary antibody overnight at 4°C and then with the fluorophore-tagged  
83 secondary antibody for 1 h. Cells were imaged by CLSM.

84

### 85 **Cell membrane destabilization**

86 M2 BMDMs ( $5 \times 10^5$  cells/12-well plate) were treated with calcein (1  $\mu\text{g}/\text{mL}$ ) and then incubated  
87 with P1, LPS, or cGAMP for 3 h. The cells were rinsed with PBS three times, stained with cell  
88 viability dye, and then fixed with a 4% paraformaldehyde solution before being stained with  
89 antibodies. The fluorescence intensity of calcein was quantified by flow cytometry. For lysosome  
90 activity, M2 BMDMs ( $5 \times 10^5$  cells/12-well plate) were treated with P1 for 24 h and cytochalasin D  
91 (positive control) for 2 h. Lysosomal intracellular activity was measured according to the  
92 manufacturer's protocol (Lysosomal Intracellular Activity Assay Kit, abcam, UK)

93

### 94 **Serum stability**

95 P1, P2, and P3 were dissolved in PBS, 5%, 10%, 20% FBS-containing phosphate buffered saline  
96 (PBS). The final concentration of each polypeptide was adjusted to 1 mg/mL. The hydrodynamic  
97 diameter and polydispersity index were measured by a dynamic light scattering method (Zetasizer  
98 Nano, Malvern, UK). Transmission electron microscopy was used to visualize the morphology of  
99 nanocomplexes between the polypeptide and serum proteins. The polypeptides (1 mg/mL in PBS)  
100 were incubated with FBS (5% in PBS), and then the nanocomplexes were negatively stained with  
101 2% uranyl acetate solution.

102

### 103 **Hemolysis assay**

104 Red blood cells were obtained by centrifuging blood samples from C57BL6 mice, and then treated  
105 with PBS, P1, P2, P3, PLL, PLG, or 10% Triton X-100 for 2 h at 37°C. The red blood cells were  
106 then spun down to collect supernatant. The absorbance ( $A$ ) at 540 nm of each sample was  
107 detected with a multi-reader. Hemolysis was calculated as:

108 
$$\text{Hemolysis (\%)} = (A_{\text{sample}} - A_{\text{PBS}}) / (A_{\text{Triton X-100}} - A_{\text{PBS}}) \times 100 (\%)$$

109

### 110 **Relative cell viability**

111 BMDMs ( $3 \times 10^4$  cells/well in 96-well plates), BMDCs ( $3 \times 10^4$  cells/well in 96-well plates) or breast  
112 cancer cells ( $1 \times 10^4$  cells/well in 96-well plates) were treated with polypeptides (200, 100, 20, 10,  
113 2, 1, 0.2, and 0.1  $\mu\text{g}/\text{mL}$ ), cGAMP, CpG, lipid nanoparticle-formulating cGAMP, or CpG (200, 10,  
114 and 1  $\mu\text{g}/\text{mL}$ ) for 1 day, after which 3-(4,5-dimethylthiazol-2-yl)-2,5-diphenyltetrazolium bromide  
115 solution (20  $\mu\text{L}$ , 2.5 mg/mL in PBS, Sigma Aldrich, USA) was added to the cells, and the cells  
116 were then incubated for 2 h to form formazan. cGAMP or CpG-loaded lipid nanoparticles were  
117 prepared by following the manufacturer's procedure [Lipid Nanoparticle (LNP-102) Exploration  
118 Kit, Cayman Chemical, USA]. To solubilize the formazan formed in cells, dimethylsulfoxide (100  
119  $\mu\text{L}$ ) was added to each well after the supernatant was discarded. Each UV-Vis absorbance ( $A$ )  
120 was detected by an UV-Vis multi-reader (CLARIOstar, BMG Labtech, USA) at 590 nm. The  
121 relative cell viability was obtained by the ratio of  $A_{\text{sample}}$  to  $A_{\text{untreated}}$ .

122

### 123 **Evaluation of systemic toxicity**

124 Six-week-old female C57BL/6J mice were intravenously injected with (4-(2-hydroxyethyl)-1-  
125 piperazineethanesulfonic acid) (HEPES), P1, or cGAMP on day 0, 2, and 4. The body weights of  
126 the mice in each group were measured every other day. On day 16, blood samples were collected  
127 from each mouse via cardiac puncture, and alanine aminotransferase (ALT), aspartate  
128 aminotransferase (AST), blood urea nitrogen (BUN), and creatinine levels were evaluated from  
129 blood plasma, and blood cells were used to assess the population of leukocytes (CD45<sup>+</sup> cells).  
130 To verify acute toxic effects after the polypeptide treatment, six-week-old female C57BL/6J mice  
131 were intravenously administrated with HEPES or P1 on day 0, 2, and 4. Blood samples and  
132 organs were obtained on day 5 (24 h after the last treatment) for long-term toxicity, or at 6 h and  
133 24 after the treatment for short-term toxicity. Organs including heart, liver, spleen, kidney, and

134 lungs were stained with hematoxylin and eosin to determine toxicity via histologic analysis. To  
135 evaluate inflammation, RNAs or proteins were extracted from hepatocytes, liver-resident  
136 macrophages, and peripheral blood mononuclear cells to conduct western blotting of the markers  
137 for cGAS-STING and TLR9 (Toll Like Receptor 9) axes or RT-qPCR of gene encoding  
138 inflammation. For assessment of organ and blood toxicities, blood tests were conducted to  
139 measure AST, ALT, BUN, and creatinine for organ toxicity, and absolute blood counts for systemic  
140 toxicity.

141

142 **Supplementary Figures**

Step I: Modulation of Hydrophobicity

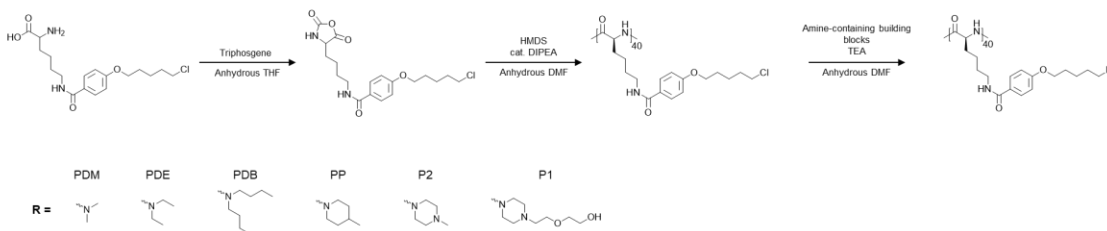

Step II: Modulation of electrostatic charges

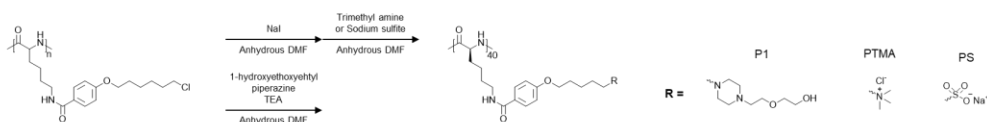

Step III: Modulation of side chain length

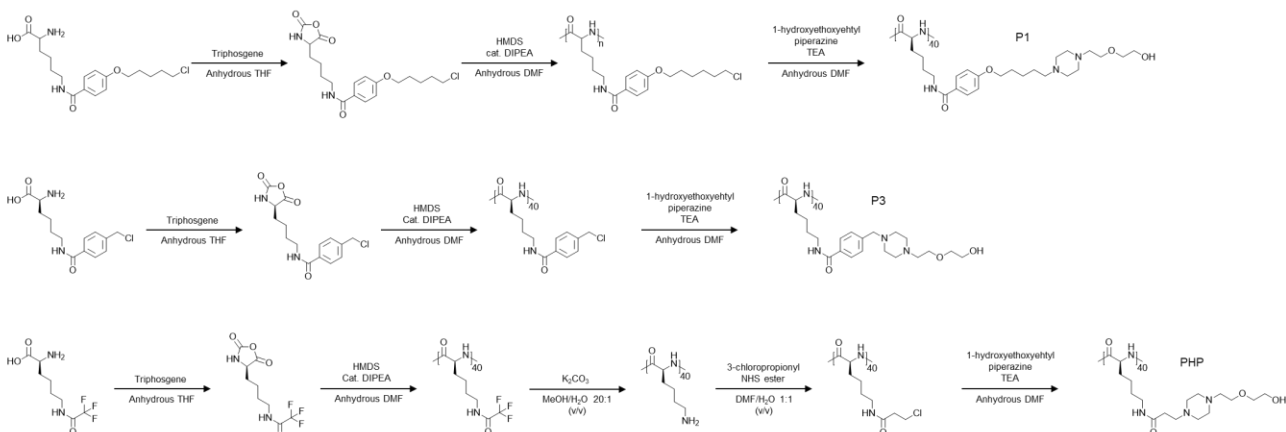

143

144 **Supplementary Fig. 1. Schema for synthesizing polypeptides by varying their hydrophobicity,**  
 145 **electrostatic charges, and side-chain length.** A 3-step optimization process was used to find the  
 146 optimal polypeptide for generating pro-inflammatory responses in innate immune cells, DMF, *N,N*-  
 147 dimethylformamide; DIPEA, diisopropylethyl amine; THF, tetrahydrofuran; TEA, trimethyl amine.

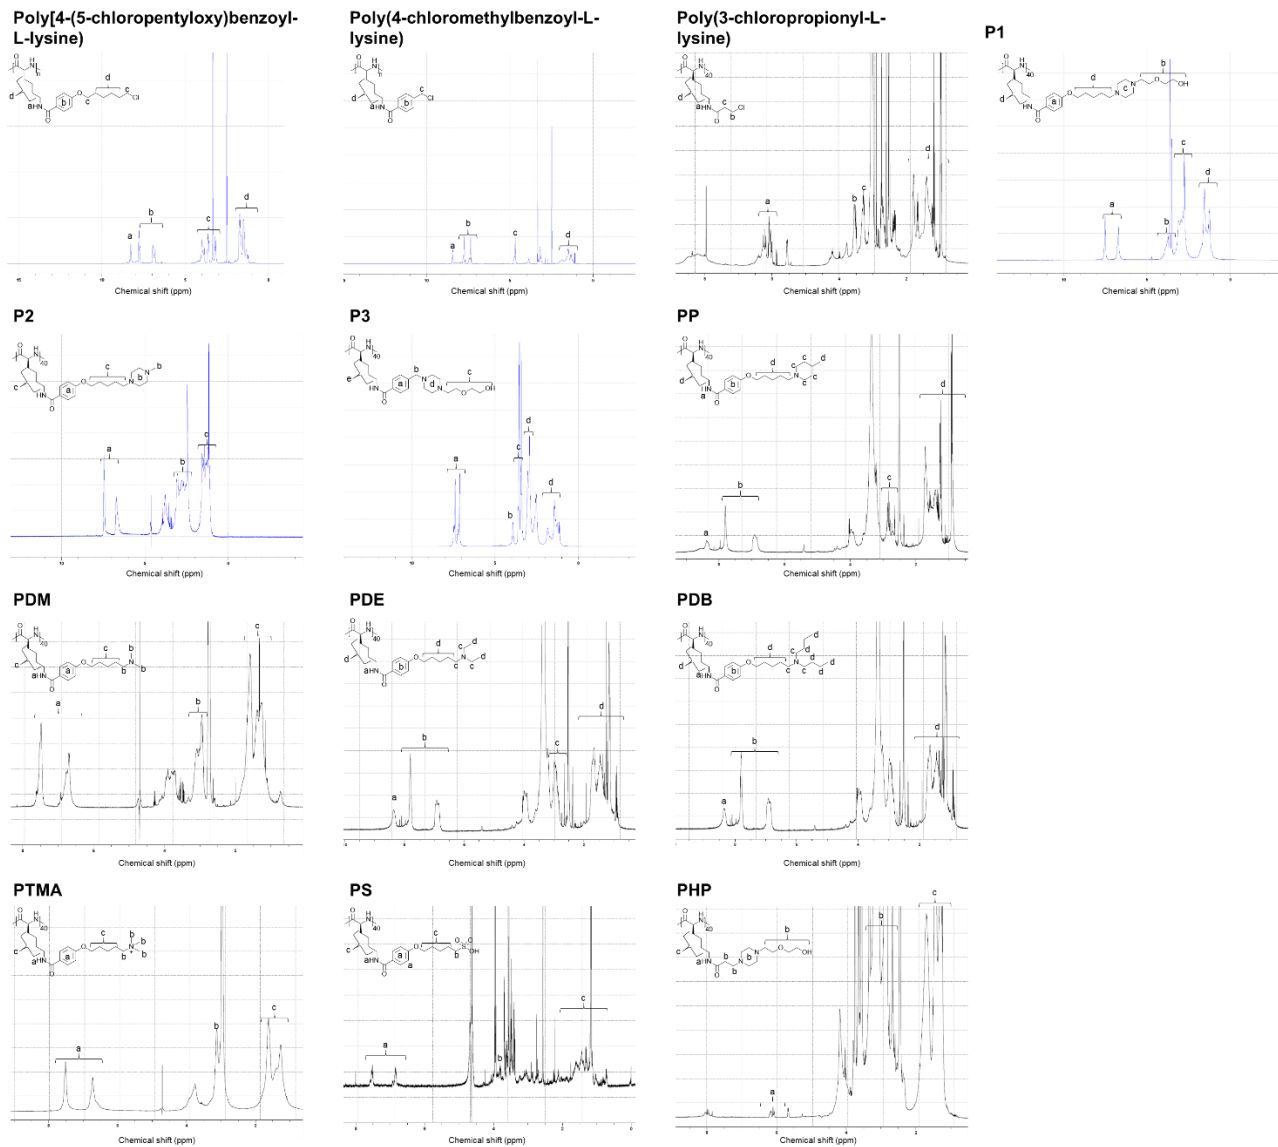

148

149 **Supplementary Fig. 2 NMR characterization of polypeptides.** Poly [4-(5-chloropentyloxy)benzoyl-L-  
 150 lysine], poly(4-chloromethylbenzoyl-L-lysine), poly(3-chloropropionyl-L-lysine), PDE, PDB, and PP  
 151 dissolved in DMSO-d<sub>6</sub>. P1, P2, P3, PDM, PTMA, PS, and PHP solubilized in D<sub>2</sub>O.



| Polypeptide entry | Number of mers | Polydispersity index | Degree of modification (%) | Calculated MW (g/mol) | Electrostatic charge density at pH 7.4 (mEq/g) |
|-------------------|----------------|----------------------|----------------------------|-----------------------|------------------------------------------------|
| PDM               | 40             | 1.31                 | >90                        | 14900                 | +2.73                                          |
| PDE               | 40             | 1.31                 | >90                        | 16000                 | +2.45                                          |
| PDB               | 40             | 1.31                 | 80                         | 17500                 | +1.73                                          |
| P1                | 40             | 1.31                 | >90                        | 19600                 | +1.99                                          |
| P2                | 40             | 1.31                 | >90                        | 18500                 | +2.24                                          |
| PP                | 40             | 1.31                 | >90                        | 17000                 | +2.34                                          |
| PTMA              | 40             | 1.31                 | >90                        | 15500                 | +2.58                                          |
| PS                | 40             | 1.28                 | 75                         | 16400                 | -1.83                                          |
| P3                | 36             | 1.28                 | >90                        | 11000                 | +2.33                                          |
| PHP               | 41             | 1.09                 | >90                        | 9000                  | +2.78                                          |

152 **Supplementary Fig. 3. Physical characterization of the polypeptides.** The number of mers and  
153 polydispersity index of all the polypeptides were determined by gel permeation chromatography of poly  
154 [4-(5-chloropentyl)oxybenzoyl-L-lysine] for PDM, PDE, PDB, P1, P2, PP, PTMA and PS, poly (4-  
155 chloromethylbenzoyl-L-lysine) for P3, and poly(*N*<sup>ε</sup>-trifluoroacetyl-L-lysine) for PHP. Degree of modification  
156 was calculated by <sup>1</sup>H-NMR spectroscopy. Electrostatic charge density at pH 7.4 was obtained by (number  
157 of electrolytes in each polypeptide)/(molecular weight of each polypeptide). The number of electrolytes  
158 was determined by MarvinSketch 23.8 Software.

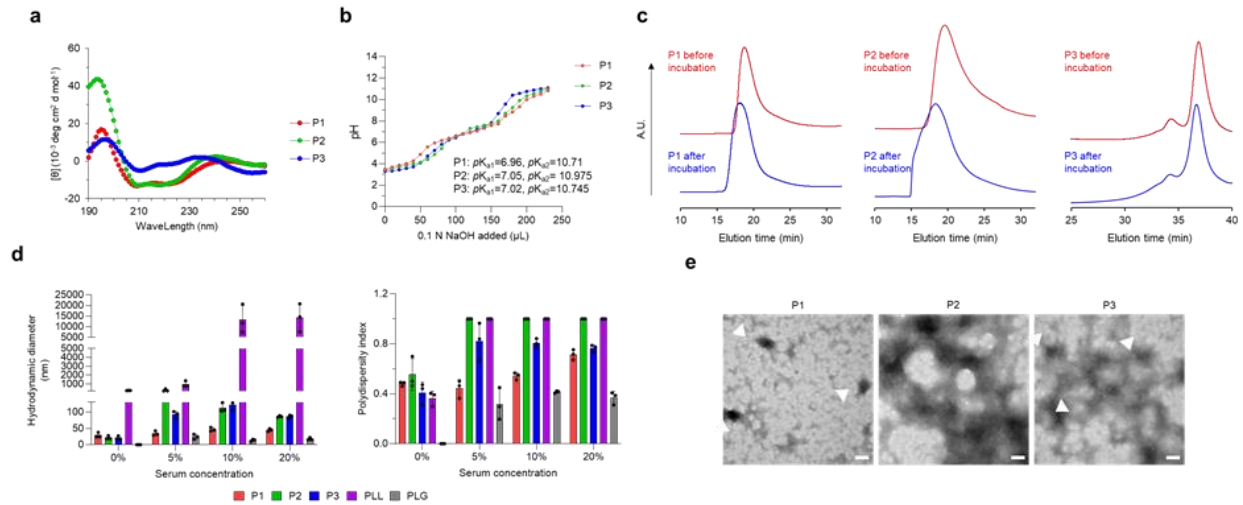

159  
 160 **Supplementary Fig. 4. Physical characterization of P1, P2 and P3** (a) Circular dichroism spectrometry  
 161 of P1 (with high helicity), P2 (with low helicity) and P3 (with low helicity). (b) pH titration of P1, P2, and P3  
 162 shows that all polypeptides had similar  $pK_a$  values. (c) P1, P2, and P3 were not degraded upon 24 h  
 163 incubation with serum at 37°C; A.U., arbitrary unit. (d) Bar graphs of hydrodynamic diameter and  
 164 polydispersity index show that P1 and P3 (endowed with an ethylene glycol moiety) showed higher serum  
 165 stability than the other polypeptides, as characterized by dynamic laser scattering ( $n=3$ , mean $\pm$ SD). Poly-  
 166 L-lysine (PLL) and poly-L-glutamate (PLG) were used as a positive and a negative control, respectively,  
 167 for polypeptide aggregation. (e) Transmission electron microscopy images show the morphology of  
 168 nanocomplexes formed between the polypeptide and serum proteins, white arrow indicates  
 169 nanocomplexes between serum proteins and polypeptide, scale bar, 100 nm.

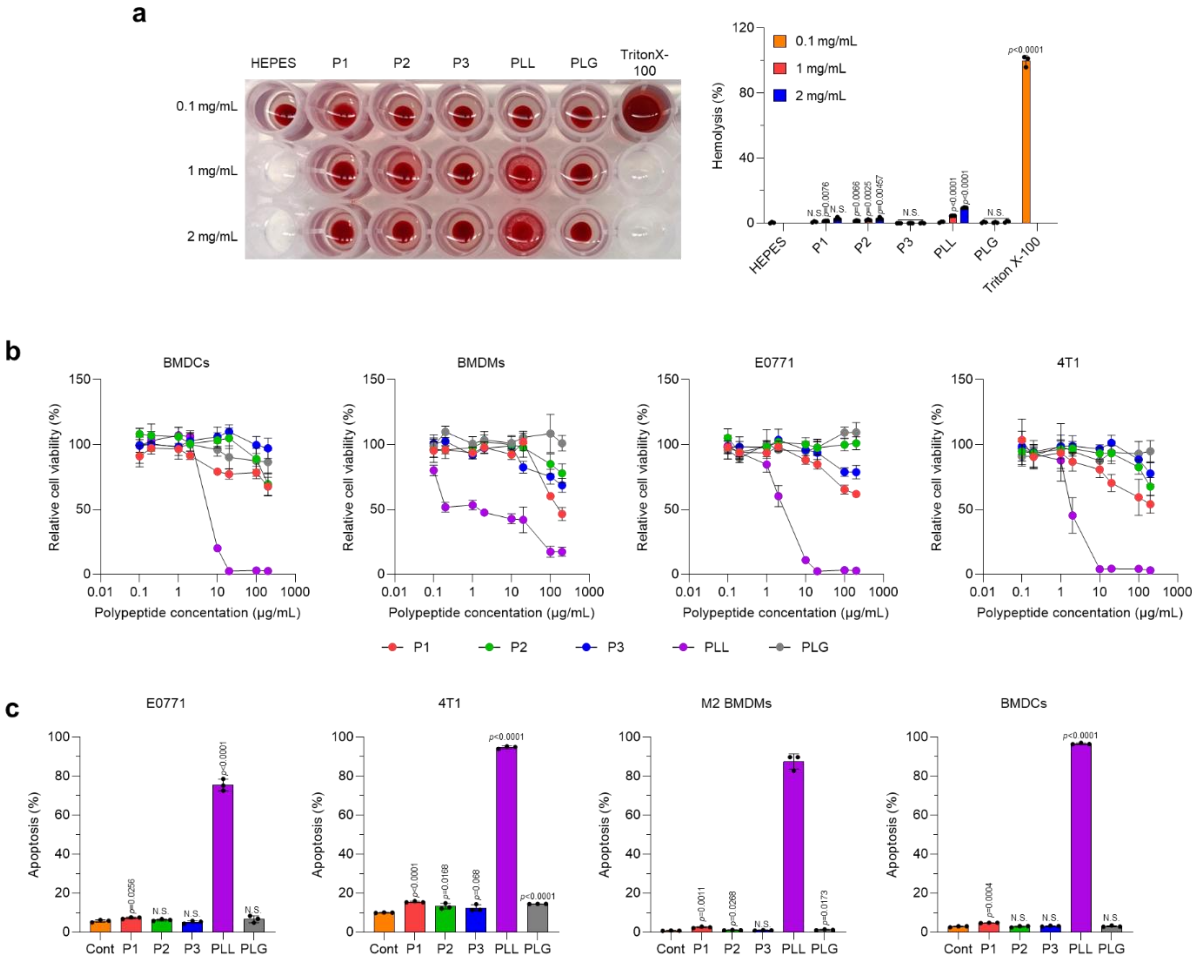

170

171 **Supplementary Fig. 5. Toxicity evaluation of polypeptides *in vitro*.** (a) Hemolytic activity of various  
 172 concentrations of P1, P2, P3, poly-L-lysine (PLL) and poly-L-glutamate (PLG) in red blood cells (n=3,  
 173 mean $\pm$ SD) relative to controls. (c) Relative viability of different cells treated with P1, P2, P3, PLL, or PLG,  
 174 as evaluated by MTT assay (n=6, mean $\pm$ SD). (d) Apoptosis was determined by staining cells with FITC-  
 175 Annexin V and PI, and evaluated by flow cytometry (n=3, mean $\pm$ SD), unpaired Student's *t* test in  
 176 comparison with Cont. PLL was used as a positive control and PLG as a negative control.

177

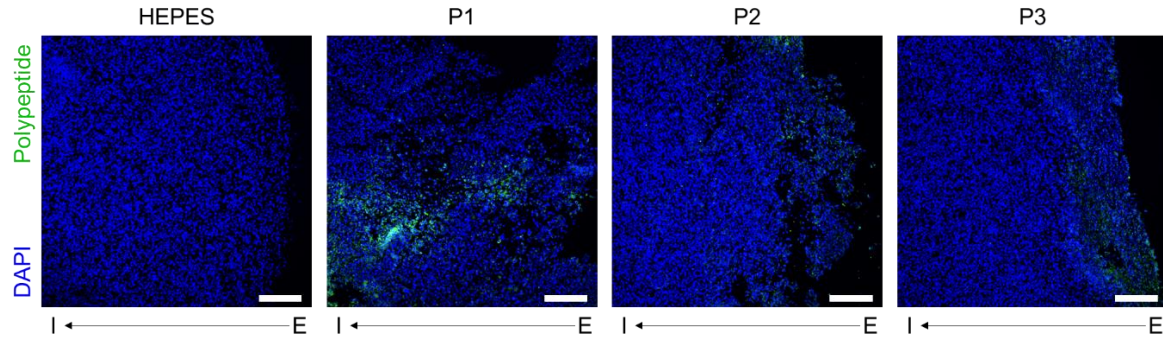

178

179 **Supplementary Fig. 6. P1 penetrates EO771 breast tumors more deeply than P2 or P3.** The tumor was harvested 12 h after the final treatment with FITC-tagged P1, P2, or P3 (10 mg/kg); scale bar, 250 μm; I, intratumoral; E, extratumoral.

182

183

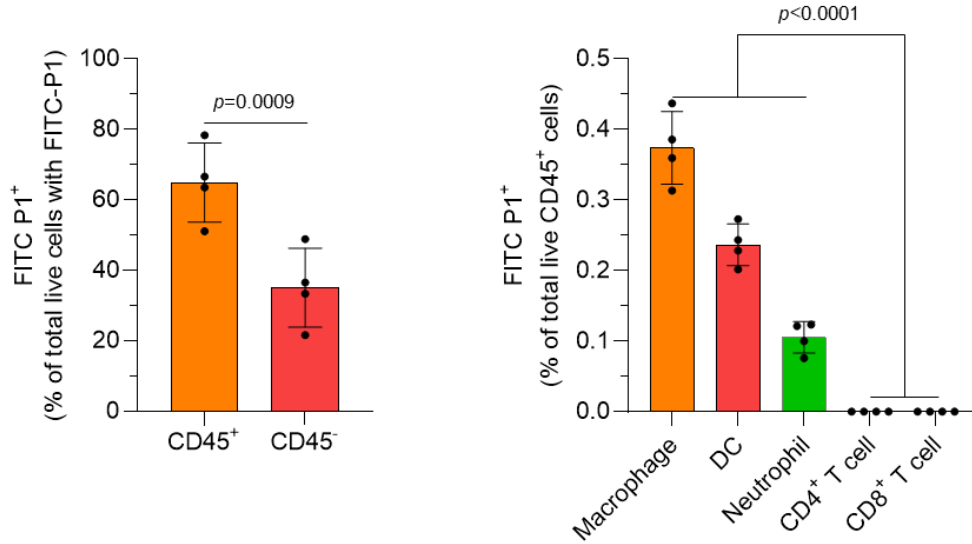

184

185 **Supplementary Fig. 7. P1 has specificity for myeloid cells within the tumor microenvironment.** FITC-tagged P1 was given intravenously to EO771 tumor-bearing mice and tumors were harvested 12 h afterward. (a) P1 was more favorably taken up in CD45<sup>+</sup> cells (n=4, mean±SD), Student's *t* test in comparison with the indicated conditions. (b) P1 accumulated in macrophages, DCs (dendritic cells), and neutrophils within the tumor microenvironment to a much greater extent than in tumor-infiltrating T cells (n=4, mean±SD), Student's *t* test in comparison with the indicated conditions.

191

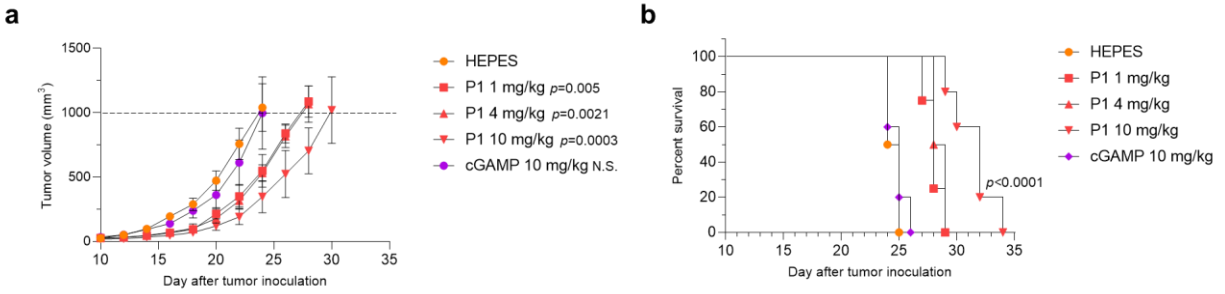

192

193 **Supplementary Fig. 8. Tumor growth and mouse survival curves after treatment with different**  
 194 **concentrations of P1 or cGAMP.** (a) EO771 tumor-bearing C57BL/6J mice were intravenously injected  
 195 with HEPES, P1, or cGAMP on days 10, 12, and 14. (n=4 for HEPES; P1, 1 mg/kg; P1, 4 mg/kg; n=5 for  
 196 P1 10 mg/kg, cGAMP 10 mg/kg, mean±SD), unpaired Student's *t* test relative to HEPES on day 24; N.S.,  
 197 not significant. (b). Kaplan-Meier survival curves for tumor-bearing mice treated with HEPES, P1, or  
 198 cGAMP, log-rank (Mantel-Cox) test.

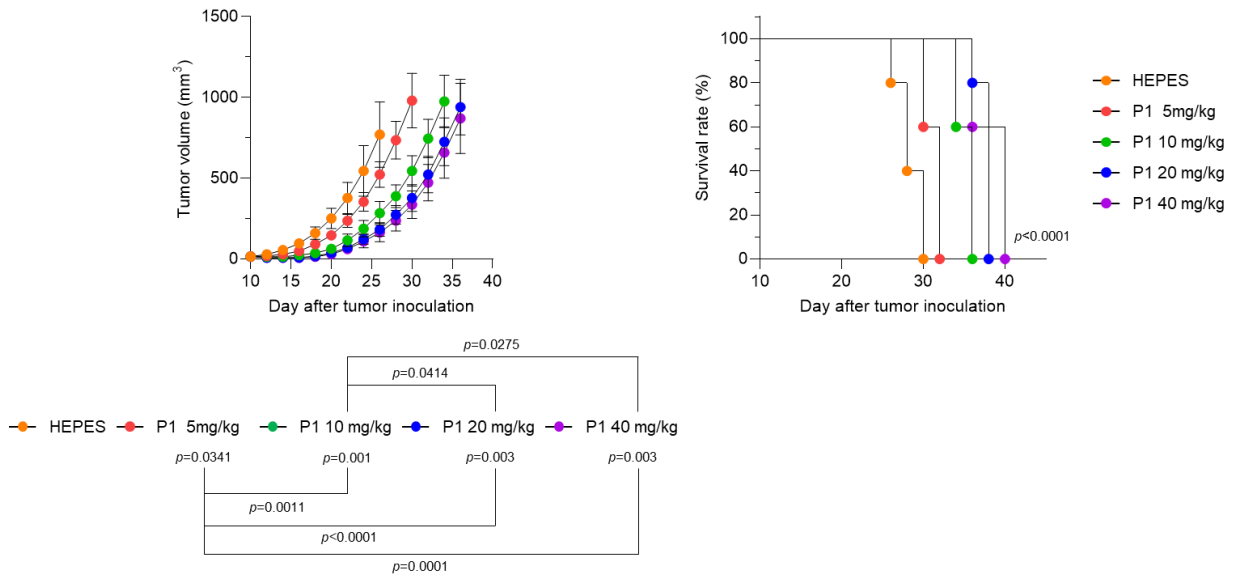

199  
200

201 **Supplementary Fig. 9. Tumor growth and mouse survival curves after different doses of P1.** (a)  
 202 EO771 tumor-bearing C57BL/6J mice were intravenously injected with HEPES, or P1 (5, 10, 20, and 40  
 203 mg/kg) on days 10, 12, and 14. (n=5, mean±SD), unpaired Student's *t* test relative to HEPES or the  
 204 indicated conditions at day 24; N.S., not significant. (b). Kaplan-Meier survival curves for tumor-bearing  
 205 mice treated with HEPES or P1; log-rank (Mantel-Cox) test.

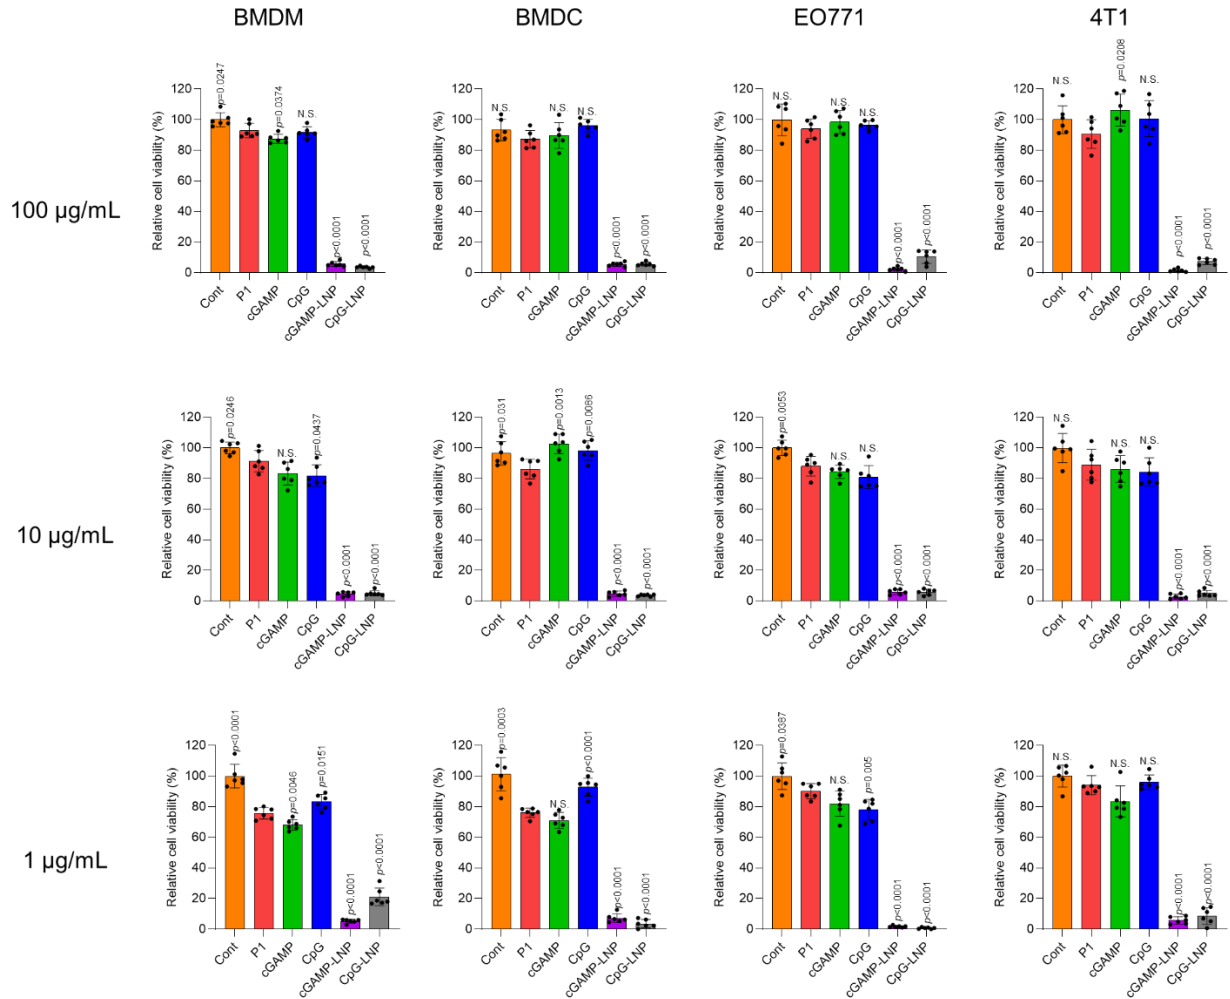

206

207 **Supplementary Fig. 10. P1 does not induce cytotoxic effects in tumor cells and APCs relative to**  
 208 **nanoformulated cGAMP or CpG.** BMDMs, BMDCs, and EO771 and 4T1 tumor cells were treated with  
 209 the indicated concentrations of P1, cGAMP, CpG, cGAMP-loaded lipid nanoparticle (cGAMP-LNP), or  
 210 CpG-loaded lipid nanoparticle (CpG-LNP) for 24 h at the indicated concentrations (n=6, mean±SD),  
 211 unpaired Student's *t* test in comparison with P1; N.S., not significant.

212

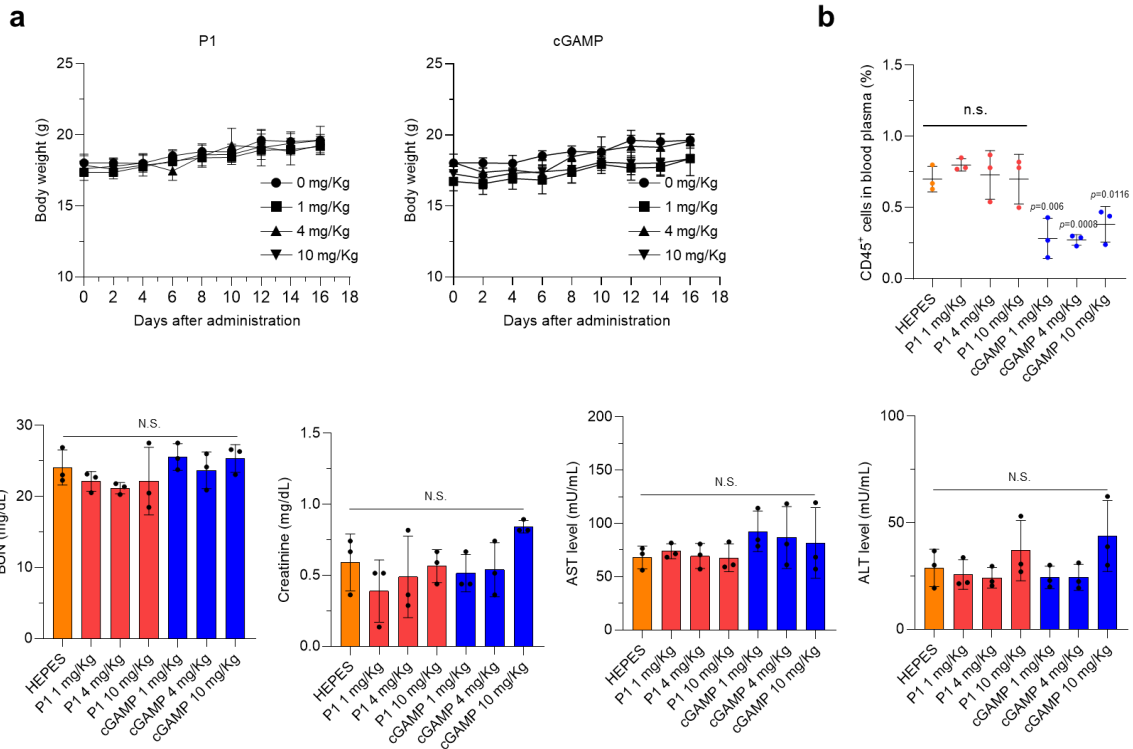

213

214 **Supplementary Fig. 11. P1 shows outstanding biocompatibility *in vivo*.** C57BL/6J mice were given  
 215 P1, or cGAMP intravenously three times every other day. (a) Body weights of P1- and cGAMP-treated  
 216 mice (n=3, mean±SD). (b) Proportions of CD45<sup>+</sup> cells in blood plasma after treatment with P1 or cGAMP  
 217 as evaluated by flow cytometry (n=3, mean±SD), unpaired Student's *t* test; n.s., not significant. (c) Levels  
 218 of blood urea nitrogen (BUN), creatinine, alanine aminotransferase (ALT), and aspartate  
 219 aminotransferase (AST) in blood plasma of treated mice (n=3, mean±SD), ordinary one-way analysis  
 220 (ANOVA); N.S., not significant.

221

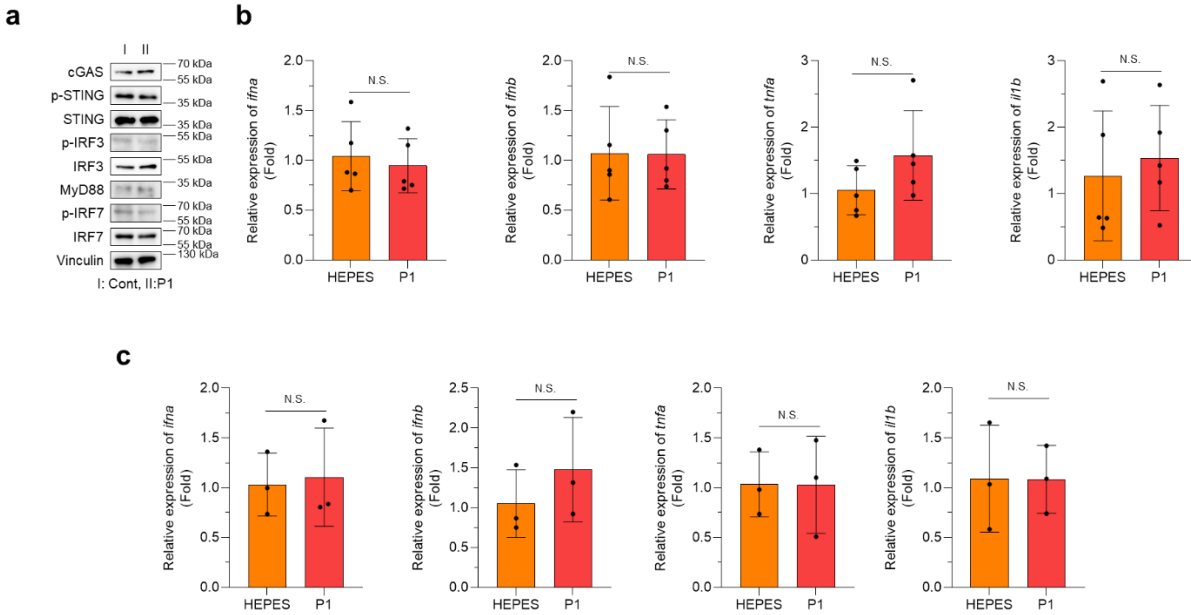

222

223 **Supplementary Fig. 12. P1 does not induce inflammation in liver and peripheral blood**  
 224 **mononuclear cells.** C57BL/6J mice were given HEPES or P1 (10 mg/kg) intravenously three times every  
 225 other day; liver and blood samples were obtained 24 h after the final treatment. (a) Western blot images  
 226 show that P1 did not activate cGAS-STING-IRF3 or TLR-MyD88-IRF7 signaling in hepatocytes. (b,c) P1  
 227 treatment did not upregulate the expression of genes encoding *ifna*, *ifnb*, *tnfa*, or *il1b* in hepatocytes (n=5,  
 228 mean±SD) or peripheral blood mononuclear cells (n=3, mean±SD); N.S., not significant.



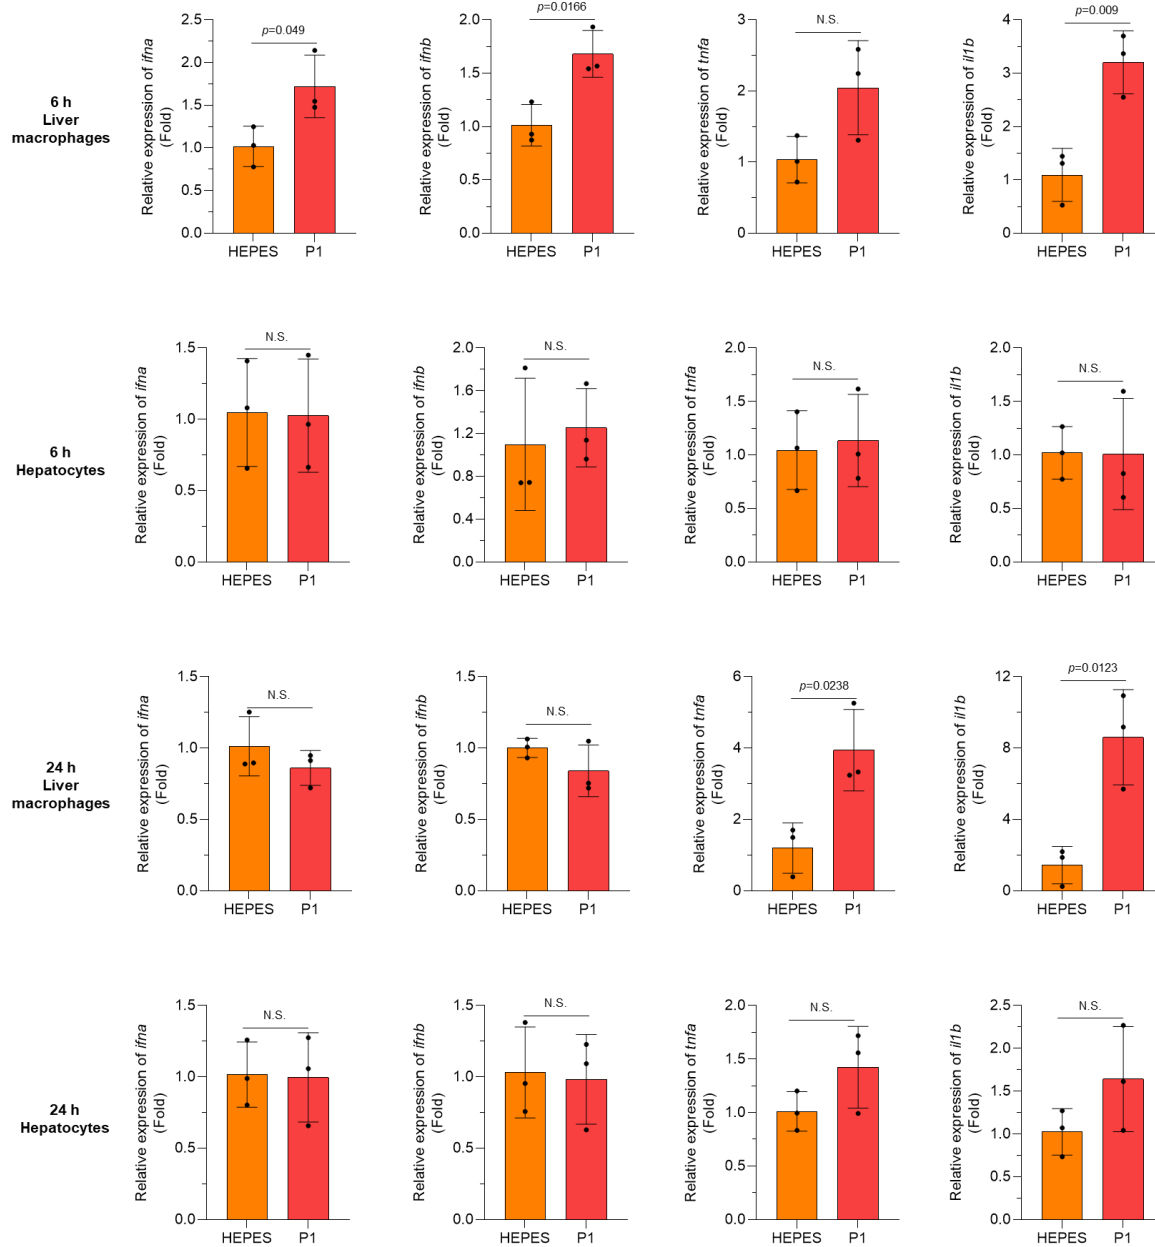

229

230 **Supplementary Fig. 13. P1 induces transient inflammation in liver macrophages but not in whole**  
 231 **hepatocytes both at 6 and 24 h after the treatment.** C57BL/6J mice were intravenously given HEPES  
 232 or P1 (10 mg/kg) once. Liver was obtained 6 and 24 h after the treatment. P1 treatments upregulated  
 233 expression of genes encoding *ifna*, *ifnb*, *tnfa*, and *il1b* in hepatocytes but not in liver macrophages (n=3,  
 234 mean±S.D); N.S., not significant.

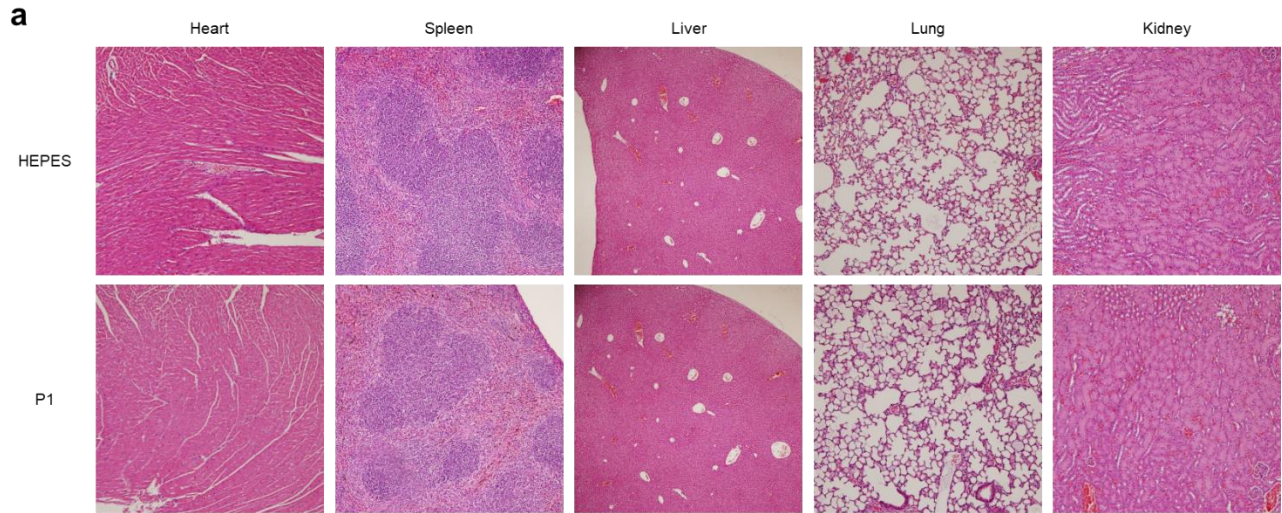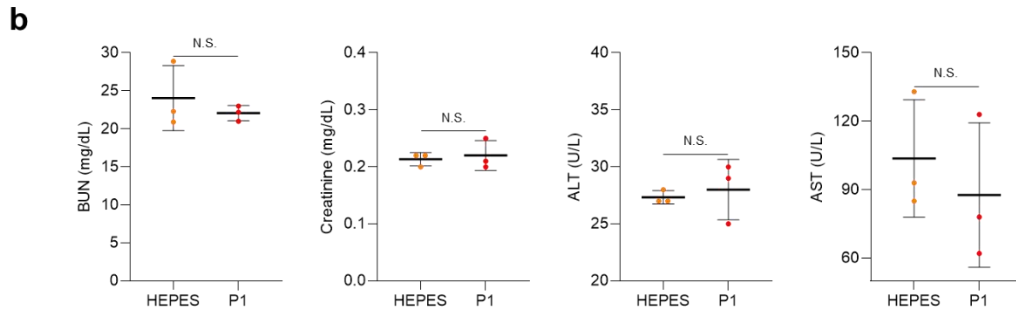

235

236 **Supplementary Fig. 14. P1 does not induce organ toxicity.** C57BL/6J mice were given HEPES or P1  
 237 (10 mg/kg) intravenously three times every other day, and organs and blood samples were obtained 24 h  
 238 after the final treatment. (a) Histologic images of heart, spleen, liver, lung, and kidney show that P1 did  
 239 not induce toxicity in these organs (10X magnification). (b) Levels of blood urea nitrogen (BUN),  
 240 creatinine, alanine aminotransferase (ALT), and aspartate aminotransferase (AST) in blood plasma of  
 241 treated mice (n=3, mean±SD), unpaired Student's *t* test in comparison with HEPES, N.S.: not significant.

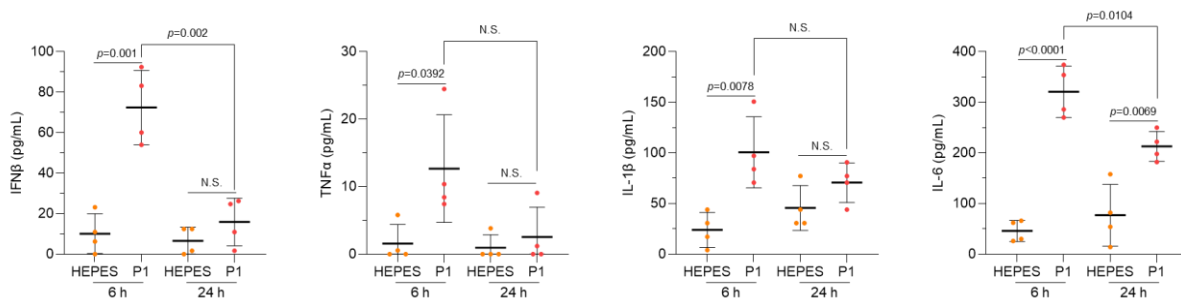

242

243 **Supplementary Fig. 15. P1 treatment induces systemic inflammation in an acute manner *in vivo*.**  
 244 HEPES or P1 (10 mg/kg) was given intravenously to EO771 tumor-bearing mice. Serum plasma was  
 245 collected at 6 h and 24 h via intracardiac bleeding. P1 treatment increased levels of IFN $\beta$ , TNF $\alpha$ , IL-1 $\beta$  or  
 246 IL-6 in serum at 6 h but at 24 h (n=4, mean±S.D.); unpaired Student's *t* test compared with the indicated  
 247 conditions.

248

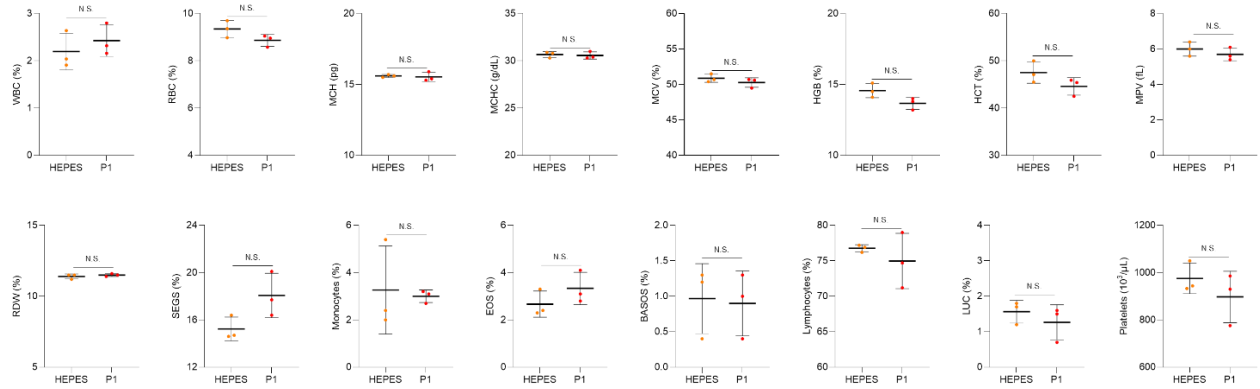

249

250 **Supplementary Fig. 16. P1 does not generate systemic inflammation.** C57BL/6J mice were given  
 251 HEPES or P1 (10 mg/kg) intravenously three times every other day. Blood samples were collected 24 h  
 252 after the final treatment. No appreciable differences were seen in complete blood counts from mice 24 h  
 253 after the final treatment (n=3, mean±SD), unpaired Student's *t* test in comparison with HEPES. WBC  
 254 (White Blood Cell), white blood cell; RBC (Red Blood Cell), red blood cell; MCH, mean corpuscular  
 255 hemoglobin; MCV, mean corpuscular volume; MCHC, mean corpuscular hemoglobin concentration; HGB,  
 256 hemoglobin; HCT, hematocrit; MPV, mean platelet volume; RDW; red cell distribution width; SEGS,  
 257 segmental neutrophils; EOS, eosinophils; BASOS, basophils; LUC, large unstained cells; N.S., not  
 258 significant.

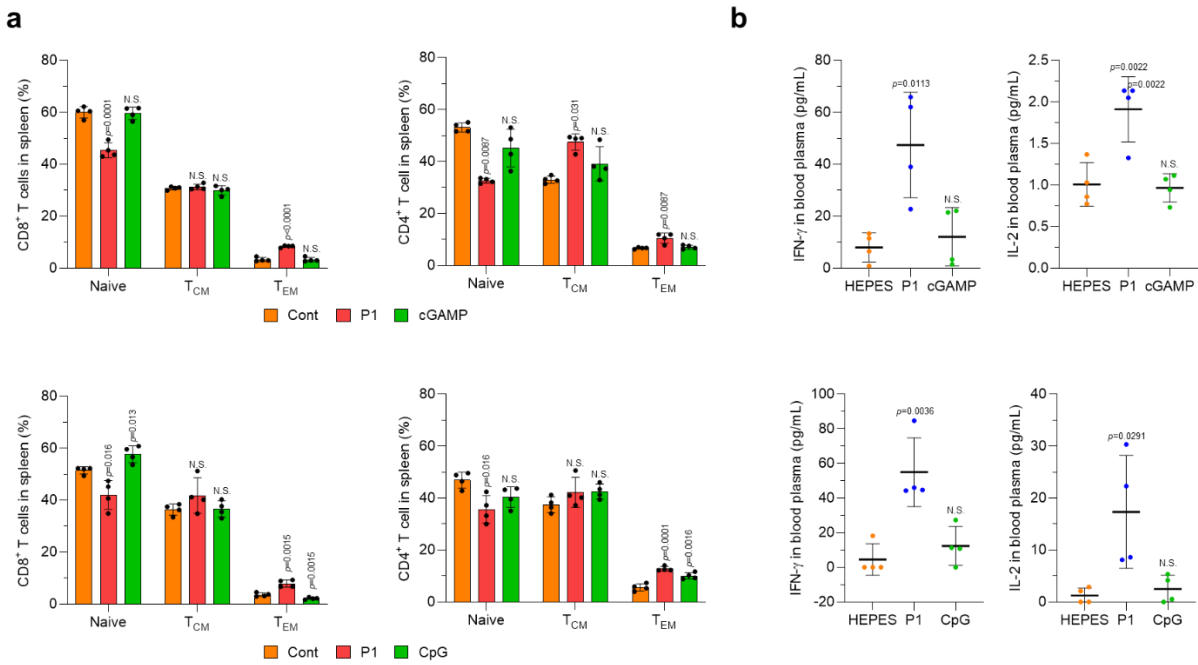

259

260 **Supplementary Fig. 17. P1 activates systemic antitumor immunity in EO771 tumor-bearing mice**  
 261 **more strongly than cGAMP or CpG oligodeoxynucleotide.** (a) Flow cytometry of splenic T cells  
 262 isolated from spleens of EO771 tumor-bearing mice on day 17 (n=4, mean±SD). (b) IFN- $\gamma$  and IL-2 levels  
 263 in blood plasma, quantified by enzyme-linked immunosorbent assay (n=4, mean±SD); unpaired Student's  
 264 *t* test in comparison with cGAMP treatment; N.S., not significant.

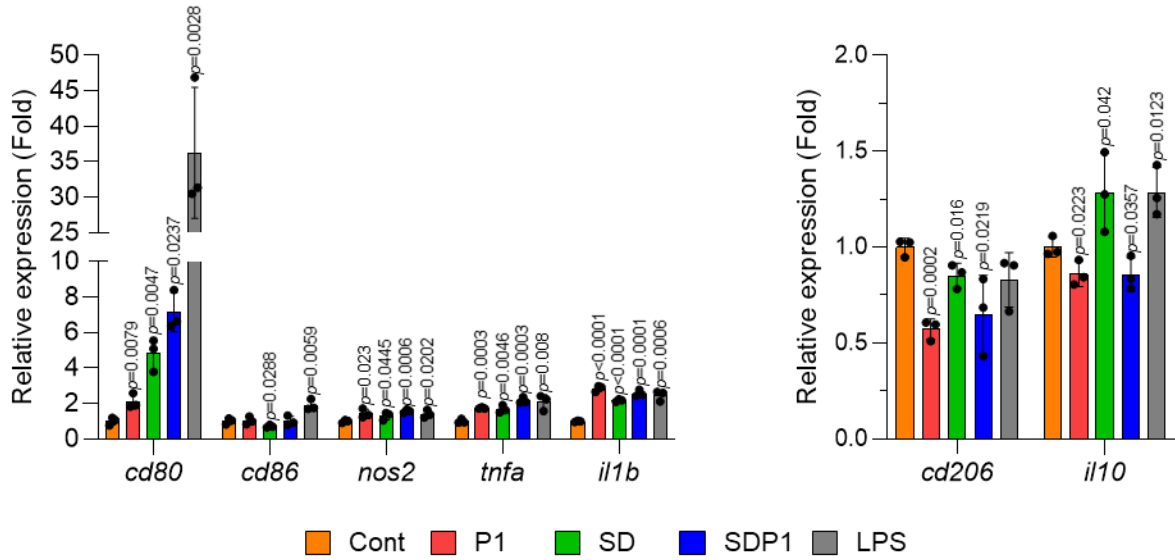

265

266

267

268

**Supplementary Fig. 18. P1 triggers pro-inflammatory signaling in THP1-derived macrophages.** P1 increased the expression of M1-associated markers but decreased expression of M2-associated markers in THP1-derived M2 macrophages (n=3, SD); unpaired Student's *t* test in comparison with control.

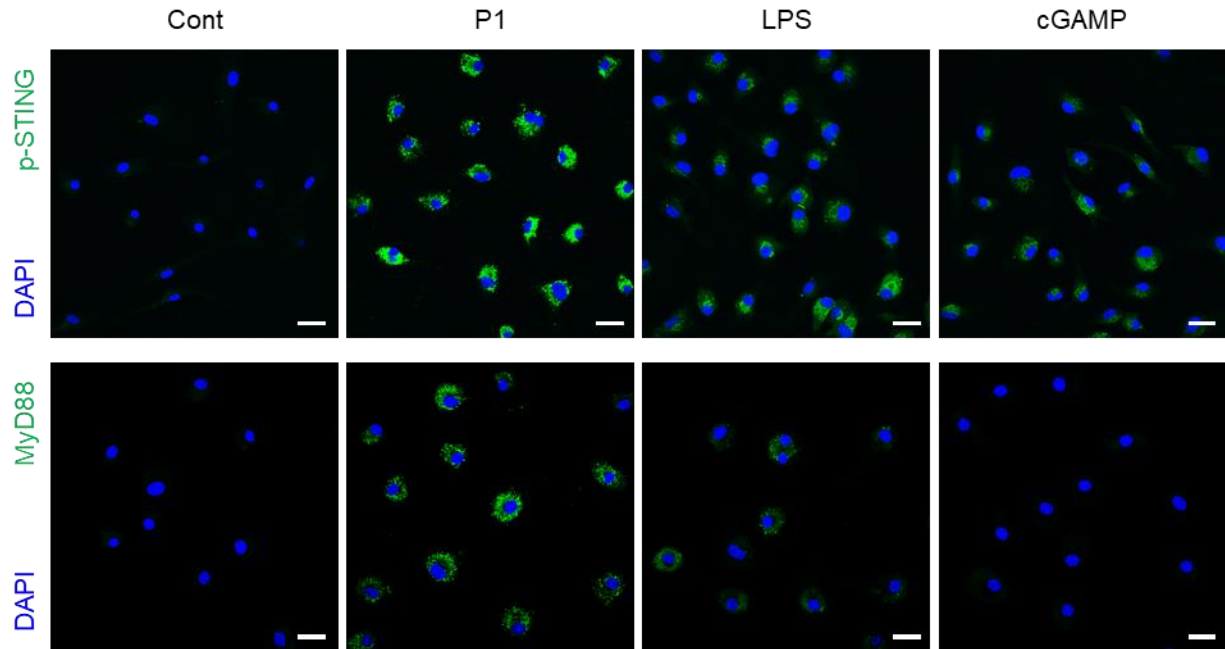

269

270 **Supplementary Fig. 19. P1 activates phosphorylation of STING and upregulates expression of**  
 271 **MyD88.** Immunofluorescence image of p-STING and MyD88 in M2 bone marrow-derived macrophages  
 272 (BMDMs) at 24 h after treatment. Scale bar, 30 μm.

273

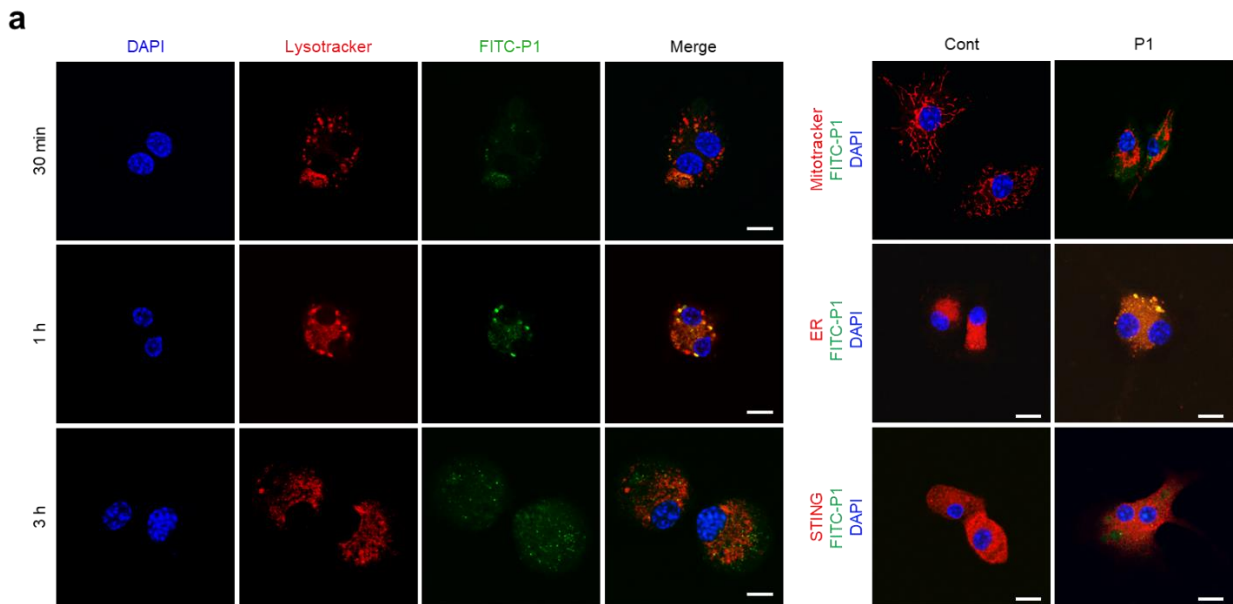

274

275 **Supplementary Fig. 20. Trafficking of P1 in M2 BMDMs.** (a) P1 escaped from lysosomes at 3 h (scale  
 276 bar 10 μm). (b) P1 was localized in the endoplasmic reticulum (ER) but not in mitochondria. P1 was  
 277 labeled with fluorescein isothiocyanate (FITC).  
 278

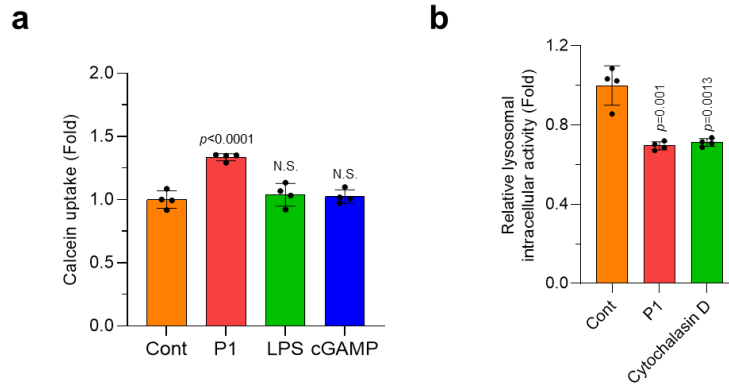

279

280 **Supplementary Fig. 21. P1 physically disrupts lipid plasma membranes.** (a) P1 destabilized lipid  
 281 plasma membranes but did not influence STING activation (n=4 SD). (b) P1 disrupted lysosome integrity  
 282 in BMDMs. (n=4, SD), unpaired Student's *t* test in comparison with Cont. Cytochalasin D used as a  
 283 positive control; N.S., not significant.

284

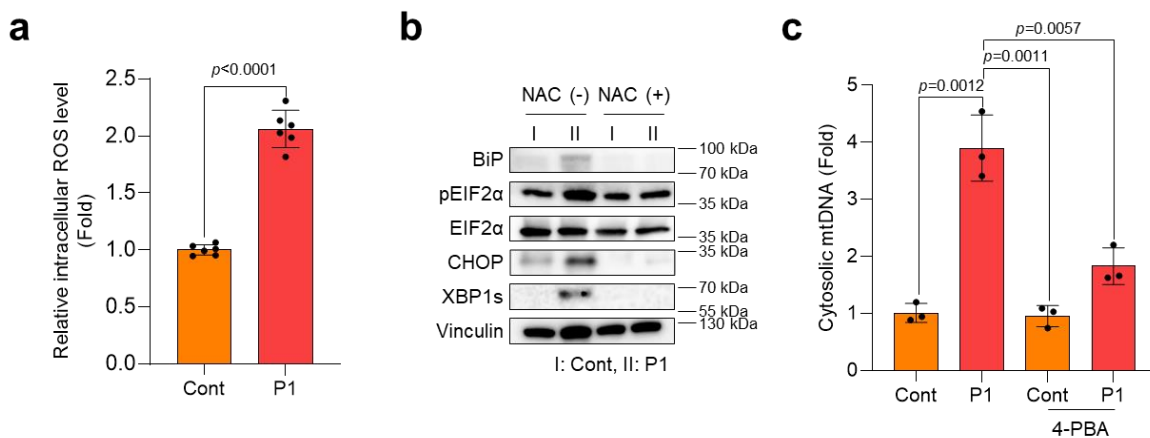

285

286 **Supplementary Fig. 22. P1 triggers mtDNA release via ROS-mediated ER stress.** (a) P1 treatment of  
 287 BMDMs led to increased intracellular ROS levels (n=6, mean±SD); unpaired Student's *t* test in  
 288 comparison with Cont. (b) Western blots of ER stress-related markers show that P1 treatments did not  
 289 induce ER stress in *N*-acetylcysteine (NAC, 10 mM)-exposed BMDMs. (c) P1 treatments inhibited mtDNA  
 290 release in BMDMs under ER stress-inhibiting conditions; sodium 4-phenylbutyric acid (4-PBA, 5 mM) was  
 291 used as an ER stress inhibitor (n=6, mean±SD); unpaired Student's *t* test in comparison with the indicated  
 292 conditions.



310 **Autophagy required for TLR9 activation**

311 We measured extracellular mtDNA contents upon treatment with cationic helical polypeptide. P1-  
 312 exposed M2 BMDMs and BMDCs emitted mtDNAs from the cytosol, which were likely taken up  
 313 by the neighboring APCs (Supplementary Fig. 25a). Next, to demonstrate the mechanism by  
 314 which P1-induced mtDNA facilitates TLR (Toll like receptors) activation, western blotting of  
 315 proteins related to TLR pathways was carried out under autophagy-inhibiting conditions<sup>1,2</sup>.  
 316 Inhibition of autophagy by silencing autophagy-related gene 5 (ATG5) was found to deactivate the  
 317 MyD88 and canonical NF- $\kappa$ B pathways, implying that P1-induced mtDNA were trapped in the  
 318 neighboring APCs' lysosome and promoted subsequent TLR activation (Supplementary Fig. 25b).

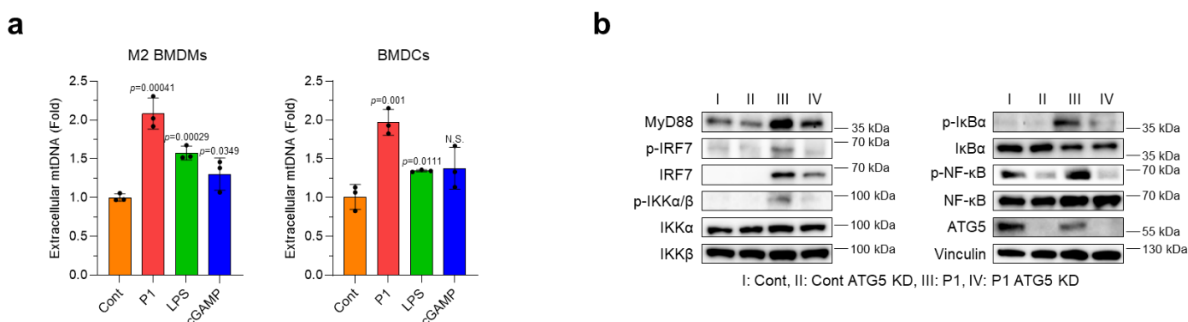

319

320 **Supplementary Fig. 25. TLR9 stimulation is essential for P1-mediated innate immune activation.**

321 (a) Extracellular mtDNA levels in M2 BMDMs or BMDCs treated with P1 (n=3, mean $\pm$ SD); unpaired  
 322 Student's *t* test in comparison to Cont; N.S., not significant. (b) Autophagy related 5 (ATG5) knockdown  
 323 (KD) in M2 BMDMs de-activated MyD88-IRF7 and canonical NF- $\kappa$ B pathways.

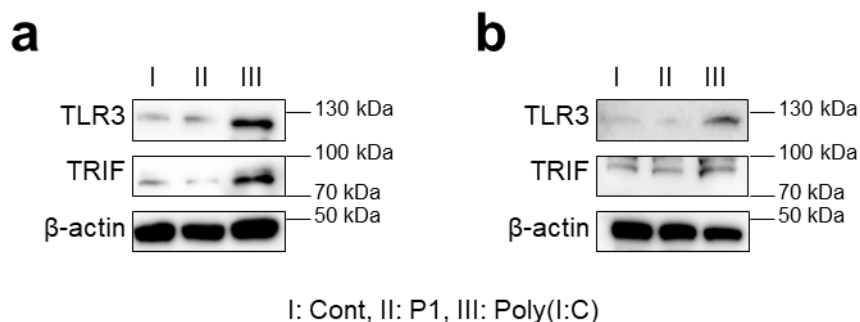

324

325 **Supplementary Fig. 26. P1 does not stimulate TLR3-TIR-domain-containing adapter-inducing**

326 **interferon- $\beta$  (TRIF) in bone marrow-derived (a) macrophages or (b) dendritic cells.** Western blots  
 327 show that treating these antigen-presenting cells with P1 did not upregulate expression of TLR3 or TRIF  
 328 protein compared with poly(I:C), a TLR3 agonist.

329



a

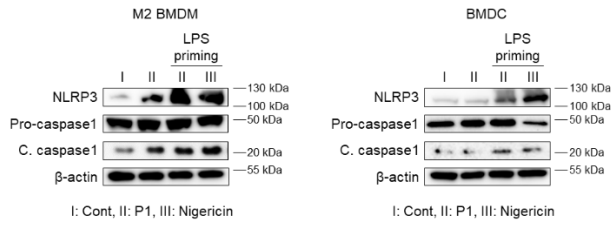

b

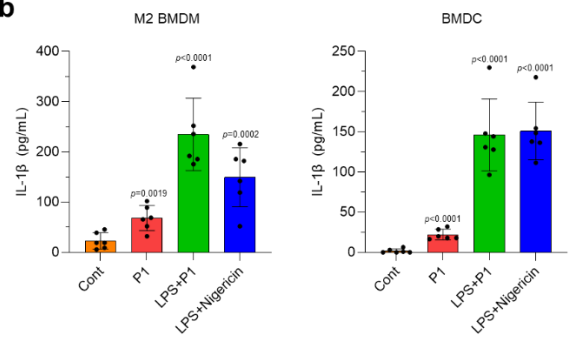

330

331 **Supplementary Fig. 27. P1 stimulates the NLRP3 inflammasome axis in BMDMs and BMDCs**  
 332 **primed with LPS.** (a) Western blot images show that P1 upregulated NLRP3 expression and promoted  
 333 cleavage of caspase-1 in BMDMs and BMDCs. (b) P1 treatment triggered interleukin (IL)-1 $\beta$  secretion in  
 334 BMDMs and BMDCs, as evaluated by enzyme-linked immunosorbent assay (n=6, mean $\pm$ SD). Unpaired  
 335 Student's *t* test in comparison with control (Cont).

a

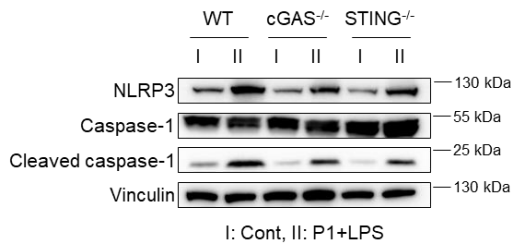

b

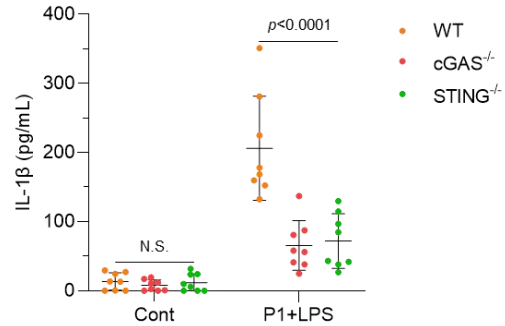

336

337 **Supplementary Fig. 28. P1 with LPS priming activates NLRP3 inflammasome pathway in BMDMs**  
 338 **in a cGAS- or STING-dependent fashion.** (a) Western blot images showing that knockout of cGAS or  
 339 STING downregulated NLRP3 inflammasome axis in BMDMs. (b) Deficiency of cGAS or STING  
 340 suppressed secretion of IL-1 $\beta$  in BMDMs (n=8, mean $\pm$ SD), ordinary ANOVA; N.S., not significant.

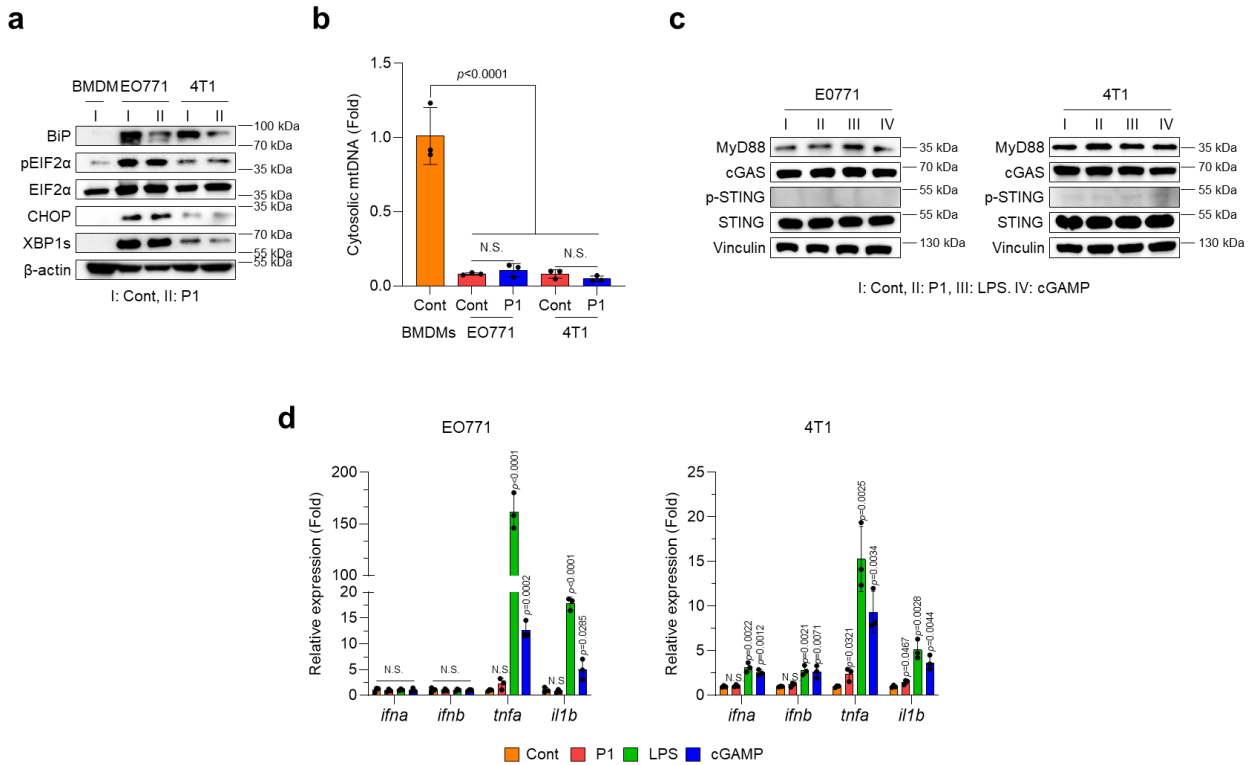

341

342 **Supplementary Fig. 29. P1 does not affect activation of MyD88 and cGAS-STING pathways in**  
 343 **cancer cells via ER stress-mediated mtDNA release.** (a) Immunoblotting of ER stress-related proteins  
 344 shows that P1 did not induce ER stress in EO771 or 4T1 breast cancer cell lines. (b) P1 did not promote  
 345 mtDNA release in EO771 or 4T1 breast cancer cell lines (n=3, mean±SD), unpaired Student's *t* test in  
 346 comparison with Cont. (c) Western blotting of proteins related to MyD88 and cGAS-STING pathways in  
 347 EO771 and 4T1 breast cancer cells. (d) P1 did not generate pro-inflammatory responses in EO771 or 4T1  
 348 breast cancer cell lines compared with LPS (n=3, mean±SD), unpaired Student's *t* test in comparison with  
 349 Cont; N.S., not significant.

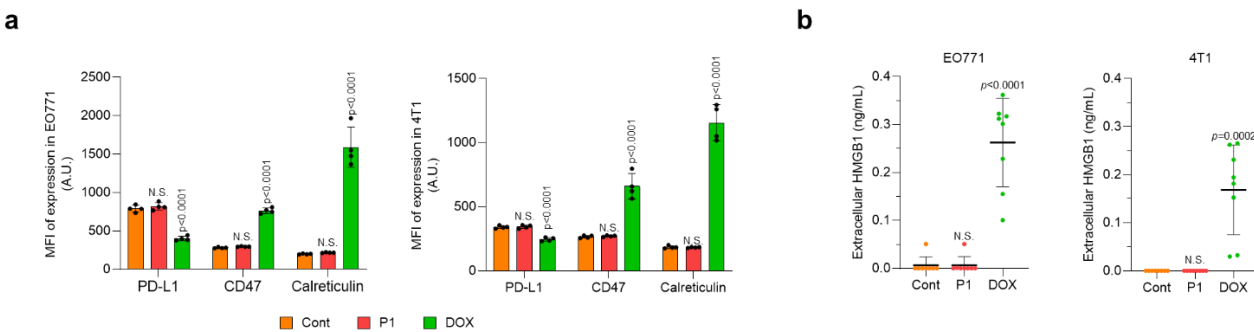

350

351 **Supplementary Fig. 30. P1 treatment does not induce immunogenic cell death or upregulate**  
 352 **immune checkpoints in breast tumor cells.** (a) P1 treatment did not increase the expression of PDL1  
 353 (Programmed cell Death Ligand 1), CD47, or calreticulin on the surface of EO771 or 4T1 breast cancer  
 354 cells; doxorubicin (DOX) was used as a positive control (n=4, mean±SD), unpaired Student's *t* test in  
 355 comparison with Cont. (c) P1 did not promote release of high mobility group box 1 protein (HMGB1) from  
 356 EO771 or 4T1 breast cancer cells (n=8, mean±SD), unpaired Student's *t* test in comparison with Cont;  
 357 N.S., not significant.

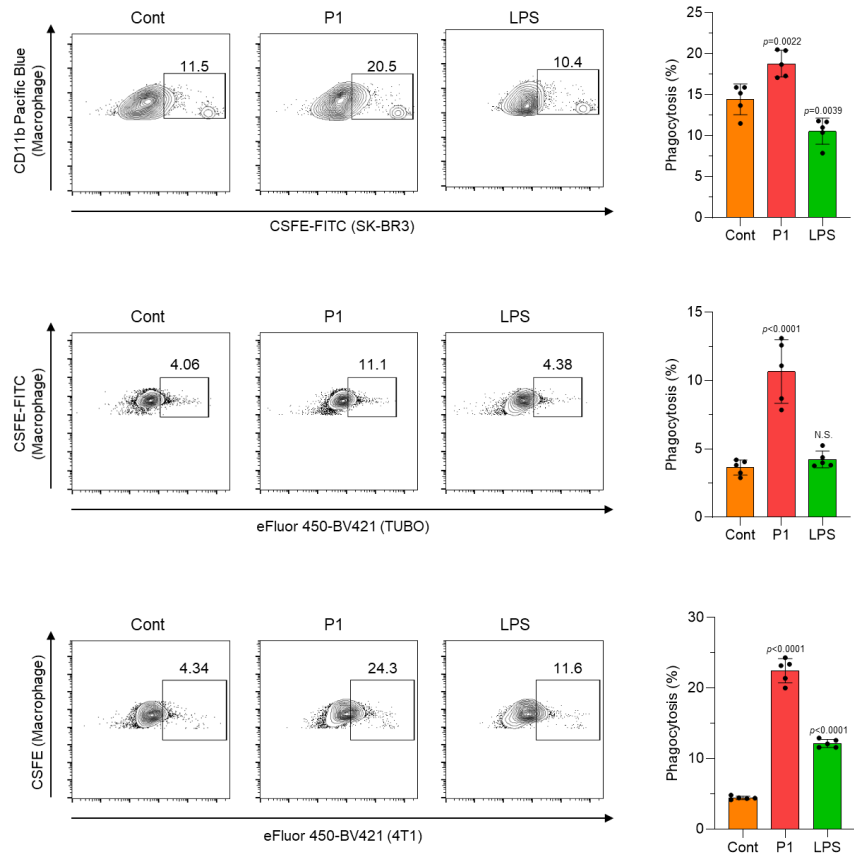

358

359 **Supplementary Fig. 31. M2 macrophages exposed to P1 show enhanced phagocytosis of breast**  
 360 **cancer cell lines SK-BR3, TUBO, and 4t1. n=5, mean±SD; unpaired Student's *t* test in comparison with**  
 361 **control (Cont).**

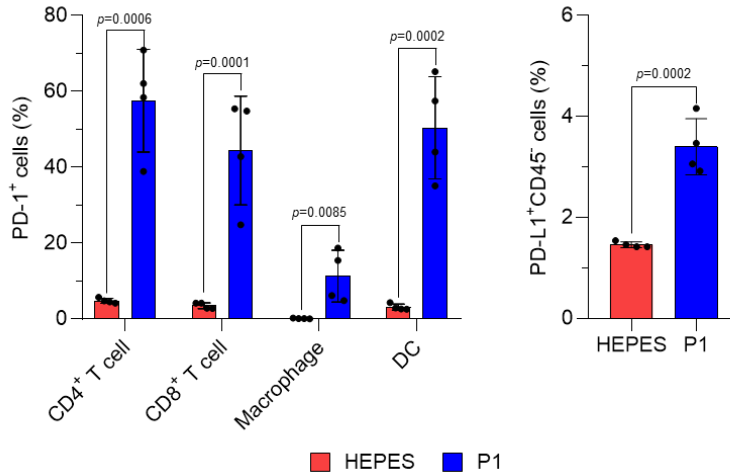

362

363 **Supplementary Fig. 32. P1 upregulates PD1 (Programmed cell Death 1) on tumor-infiltrating**  
 364 **immune cells and PDL1 expression on EO771 tumor cells.** Flow cytometry of tumor-infiltrating  
 365 immune cells and CD45<sup>-</sup> cells from EO771 tumors at 1 day after the last treatment (n=4, mean±SD);  
 366 unpaired Student's *t* test in comparison with HEPES treatment.

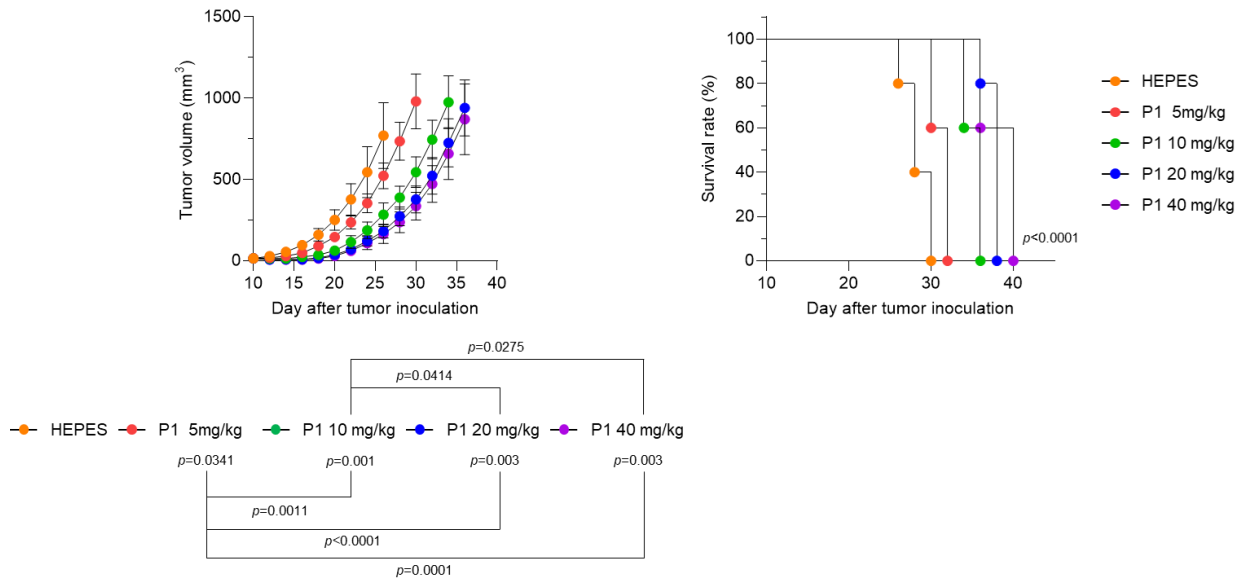

367

368 **Supplementary Fig. 33. P1 alone and in combination with αPD1 has antitumor effects on large**  
 369 **(>100 mm<sup>3</sup>) EO771 tumors.** (a,b) P1 and P1+αPD1 retarded tumor growth (n=5, mean±SD); unpaired  
 370 Student's *t* test in comparison with HEPES or the indicated conditions at day 12 after the first treatment;  
 371 and extended the survival of tumor-bearing mice with large EO771 tumors to a greater extent than did the  
 372 other treatments; log-rank (Mantel-Cox) test for Kaplan-Meier survival curves.

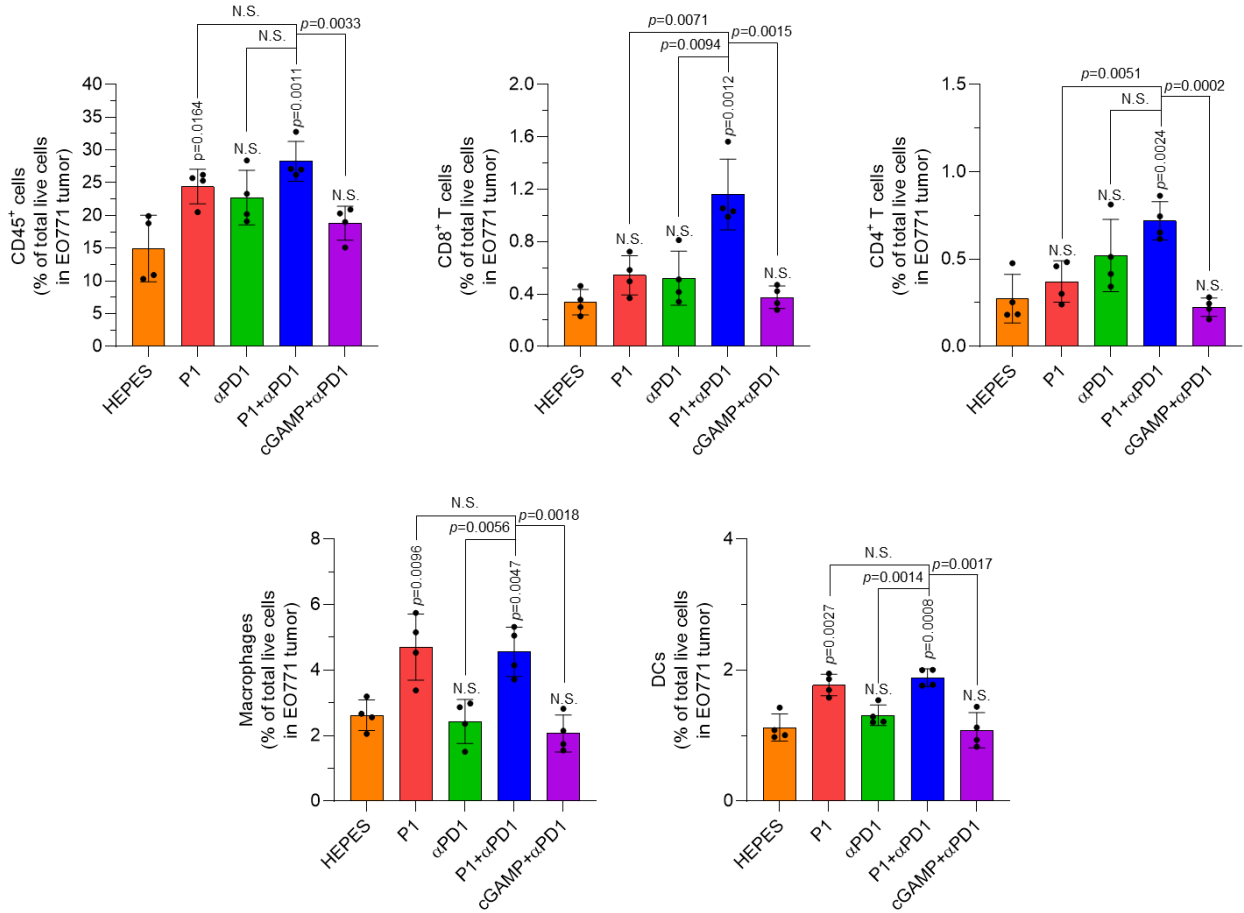

373

374 **Supplementary Fig. 34. P1+αPD1 treatment increases the populations of tumor-infiltrating**  
 375 **lymphocytes within EO771 tumors.** Immune profiling of CD45<sup>+</sup> cells, CD8<sup>+</sup> T cell, CD4<sup>+</sup> T cells,  
 376 macrophages, and DCs without CD45<sup>+</sup> cell enrichment, as evaluated by flow cytometry (n=4, mean±SD),  
 377 unpaired Student's *t* test in comparison with HEPES or the indicated conditions, N.S.: not significant.

378

**a**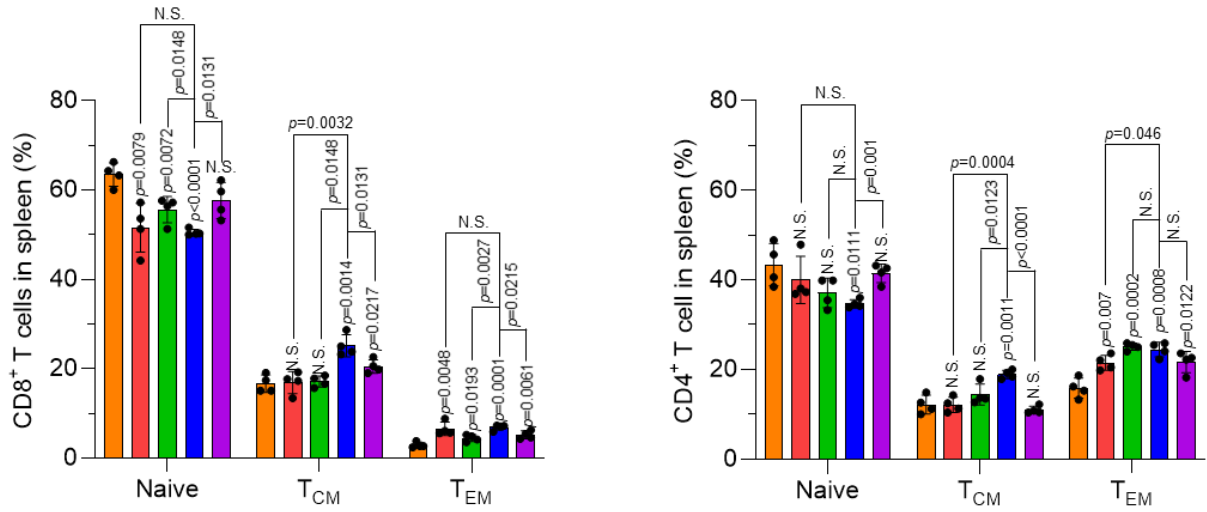**b**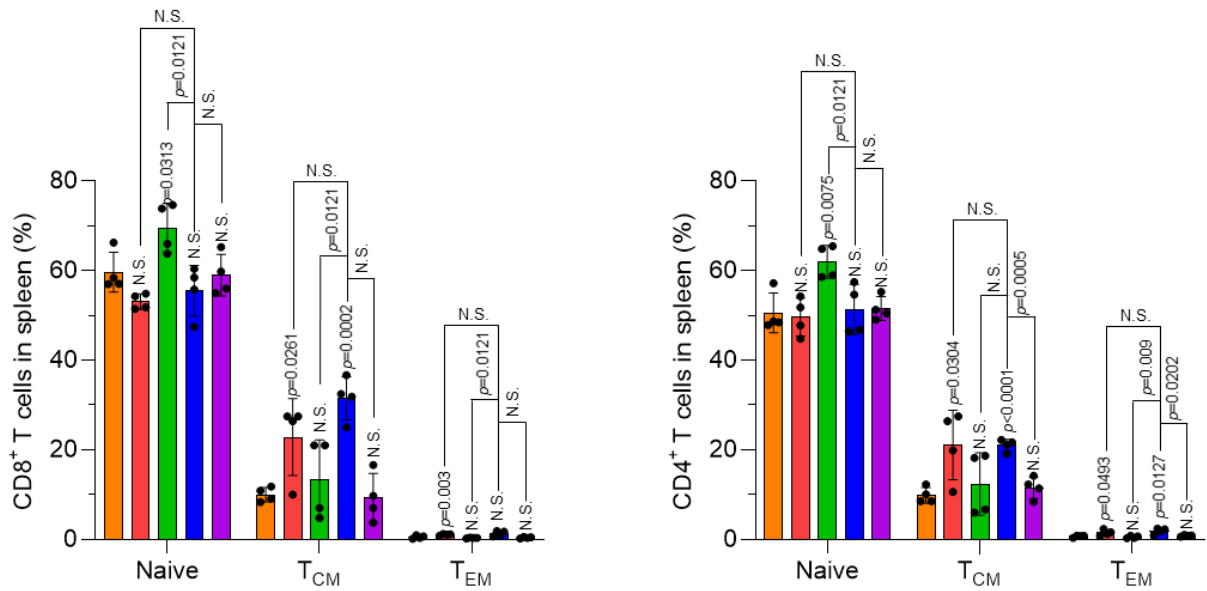

■ HEPES 
 ■ P1 
 ■ αPD1 
 ■ P1+αPD1 
 ■ cGAMP+αPD1

379

380 **Supplementary Fig. 35. Systemic treatment with P1+αPD1 shifts splenic T cells toward memory**

381 **subtypes.** Flow cytometry of T cells isolated from the spleens (harvested on day 17) of mice bearing (a)

382 EO771 tumors or (b) 4T1 tumors (n=4, mean±SD); unpaired Student's *t* test in comparison with HEPES

383 or the indicated conditions, N.S., not significant.

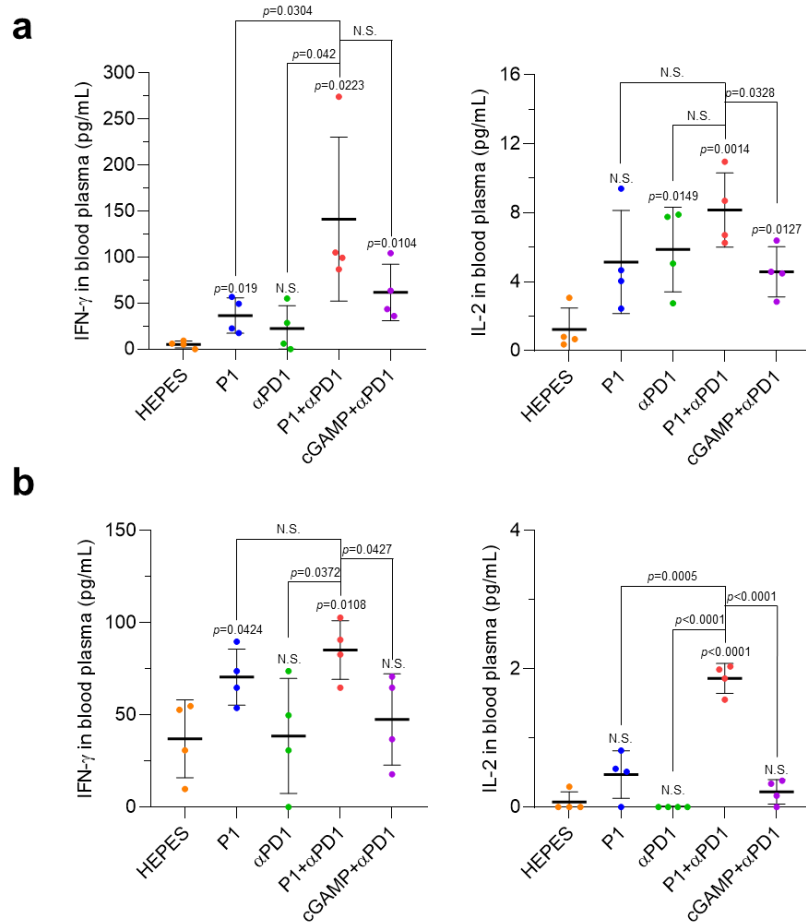

384

385 **Supplementary Fig. 36. Systemic treatment with P1 plus  $\alpha$ PD1 upregulates pro-inflammatory**  
 386 **cytokines.** Interferon (IFN)- $\gamma$  and interleukin (IL)-2 levels in blood plasma (collected on day 17) of mice  
 387 bearing (a) EO771 tumors and (b) 4T1 tumors, as quantified by enzyme-linked immunosorbent assay  
 388 ( $n=4$ , mean $\pm$ SD); unpaired Student's  $t$  test in comparison with HEPES or the indicated conditions, N.S.,  
 389 not significant.

390 **References**

- 391 1 De Leo, M. G. *et al.* Autophagosome–lysosome fusion triggers a lysosomal response  
392 mediated by TLR9 and controlled by OCRL. *Nature Cell Biology* **18**, 839-850,  
393 doi:10.1038/ncb3386 (2016).
- 394 2 Liu, Y. *et al.* TLR9 and beclin 1 crosstalk regulates muscle AMPK activation in exercise.  
395 *Nature* **578**, 605-609, doi:10.1038/s41586-020-1992-7 (2020).



396 **Flow Gating strategies**

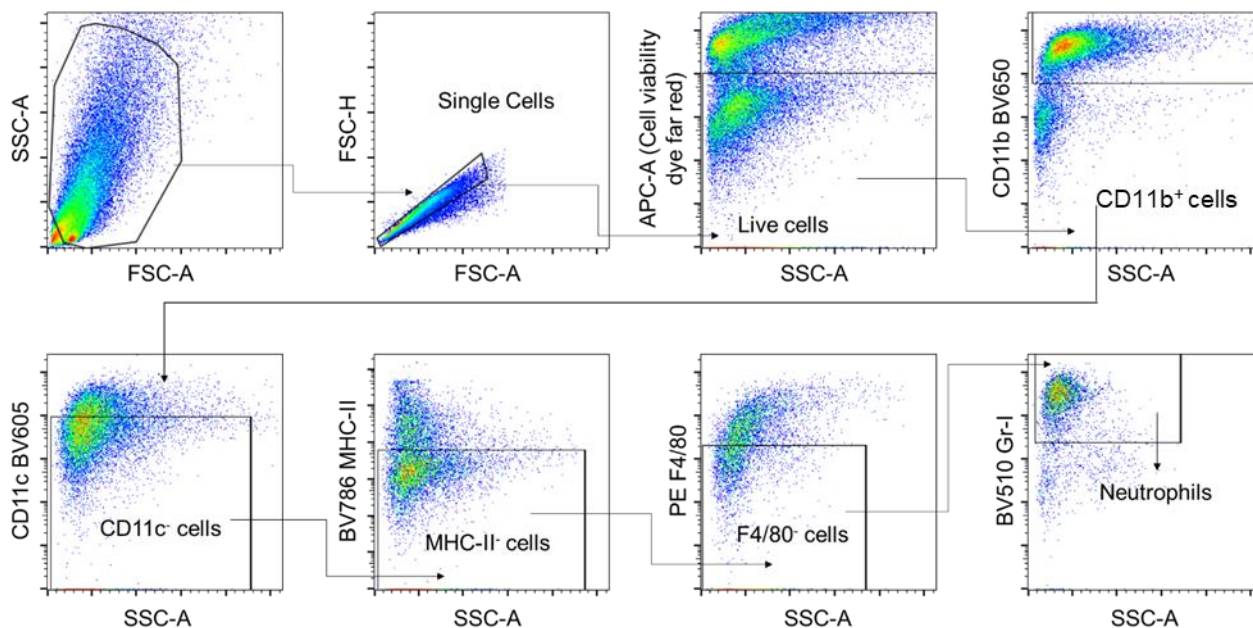

397

398 Neutrophil gating strategy, Fig. 1g and Supplementary Fig. 9.

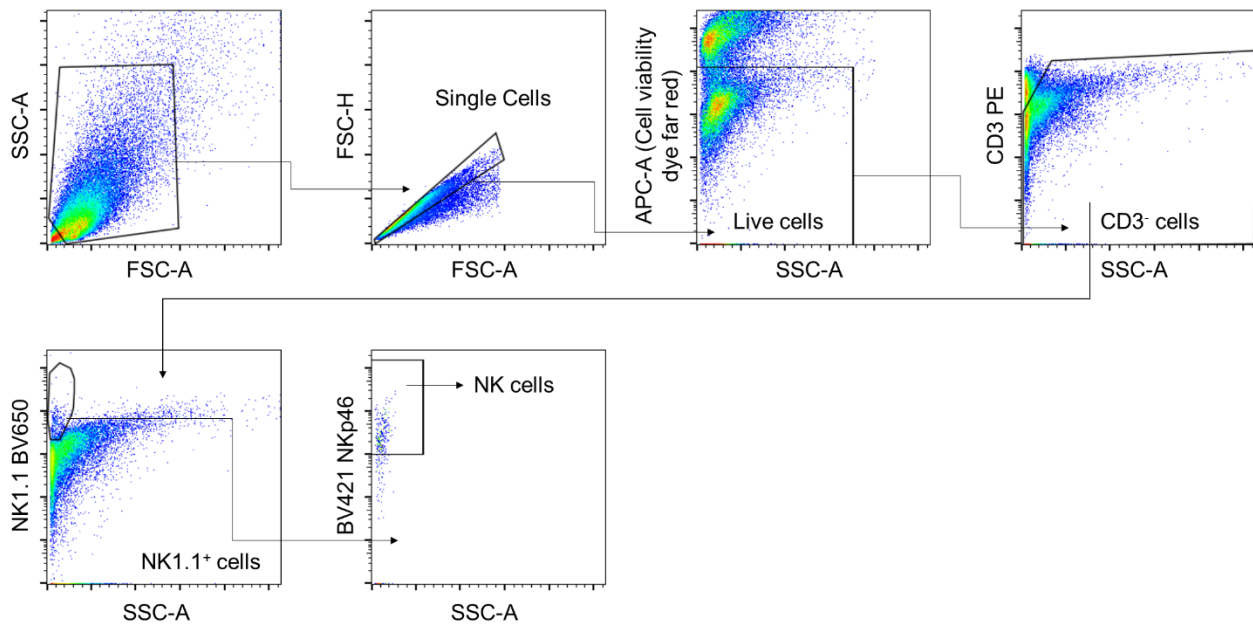

399

400 NK (Natural Killer) cell gating strategy, Fig. 1g

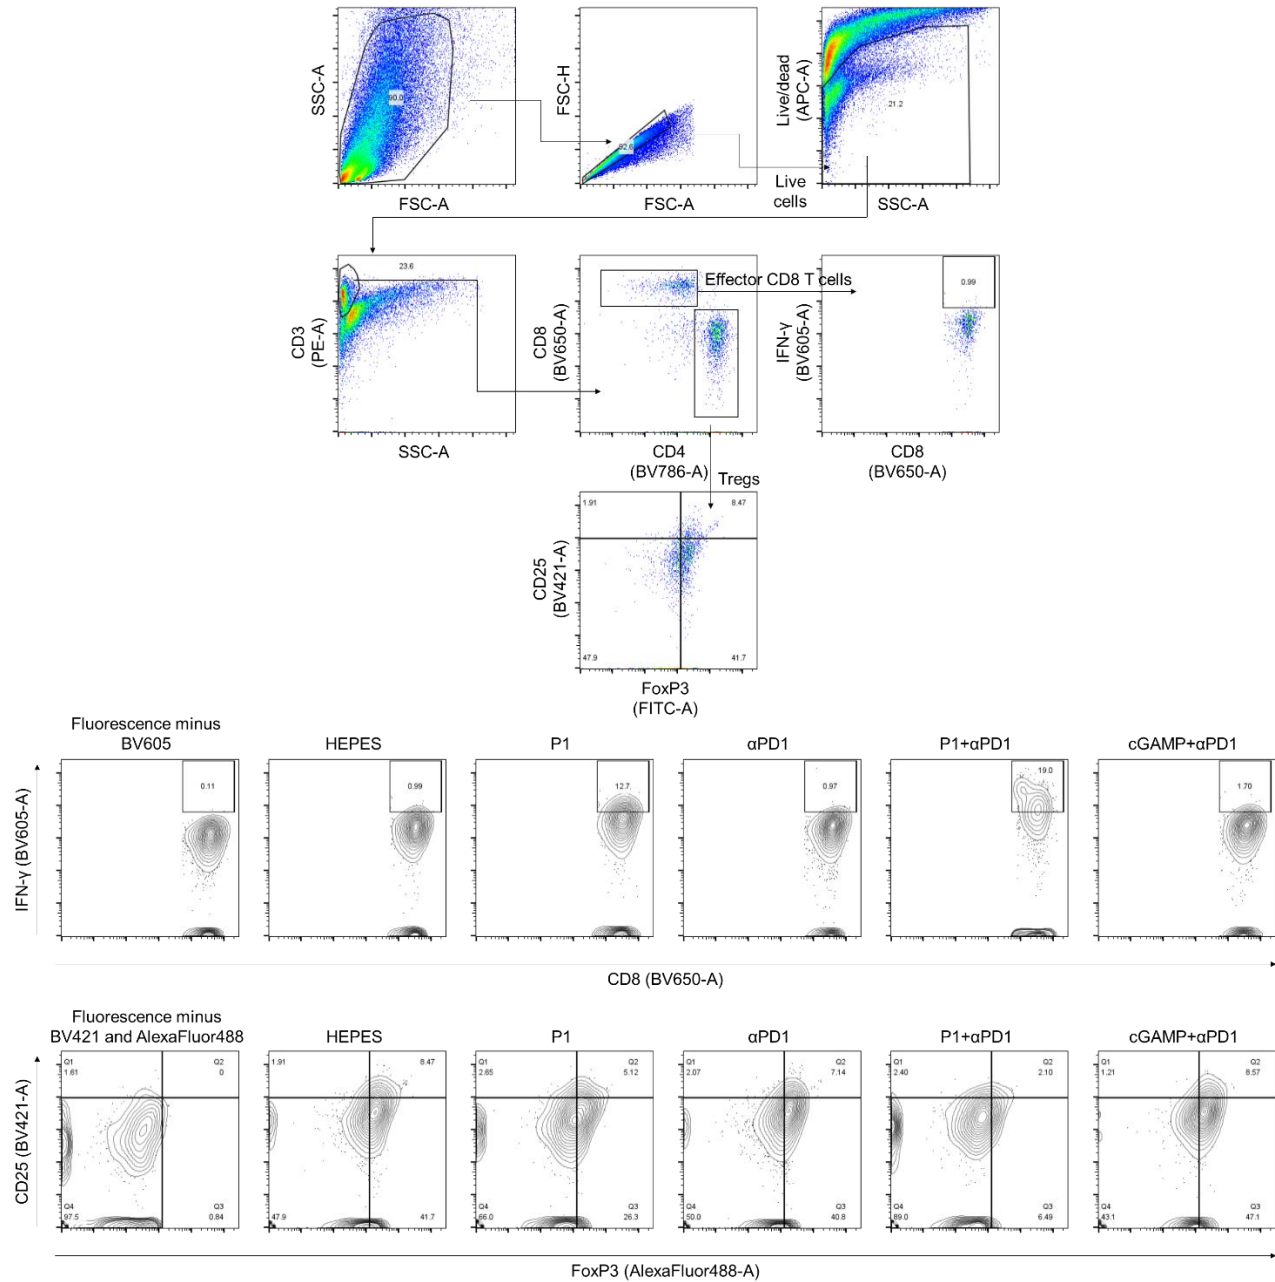

401

402 Tumor-infiltrating T lymphocytes, Fig. 1e, 2e, 5e, 7b,d, Extended Fig. 1, 2e, 7f, Supplementary

403 Fig. 9, 31, 33

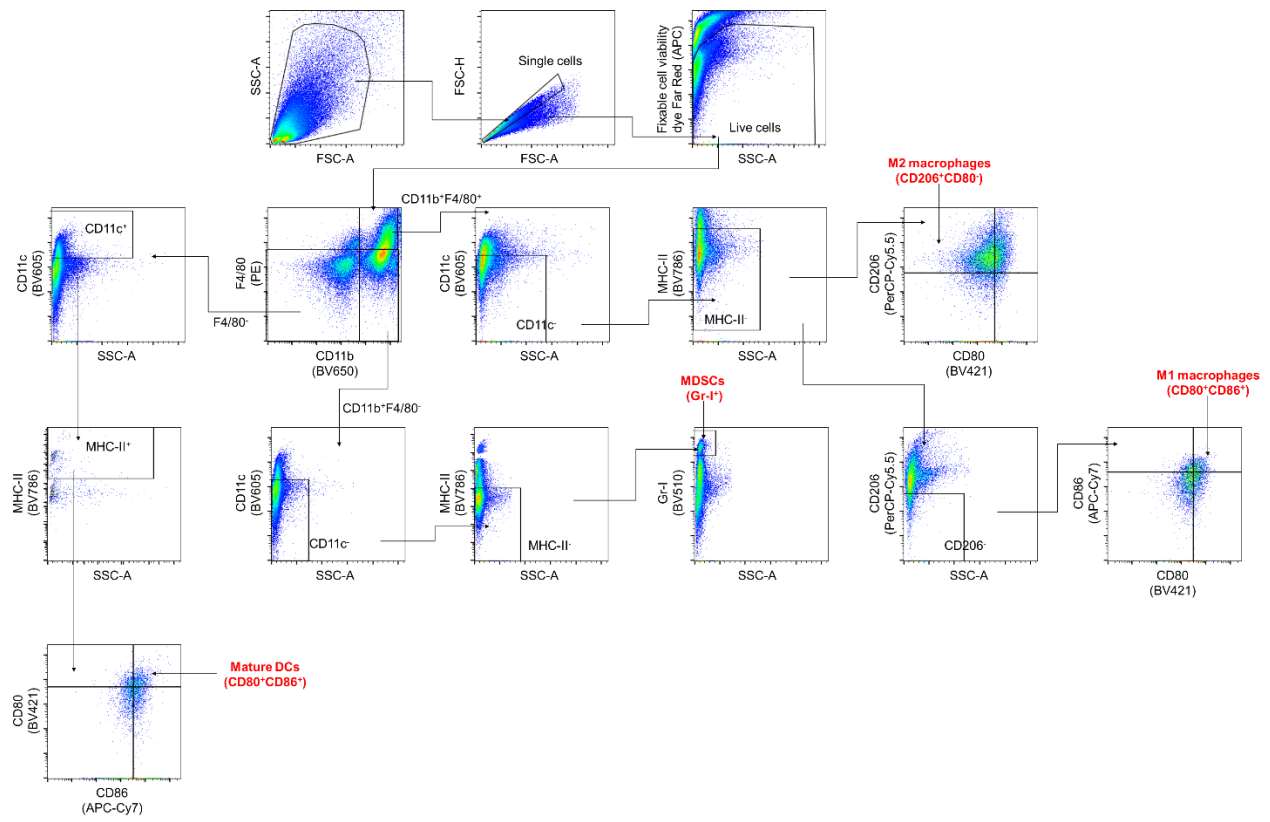

404

405 Tumor-infiltrating myeloid cells, Fig. 1e, 2f, 5g, 7b,d, Extended Fig. 1, 2g, Supplementary Fig. 9,  
 406 31, 33. [08]

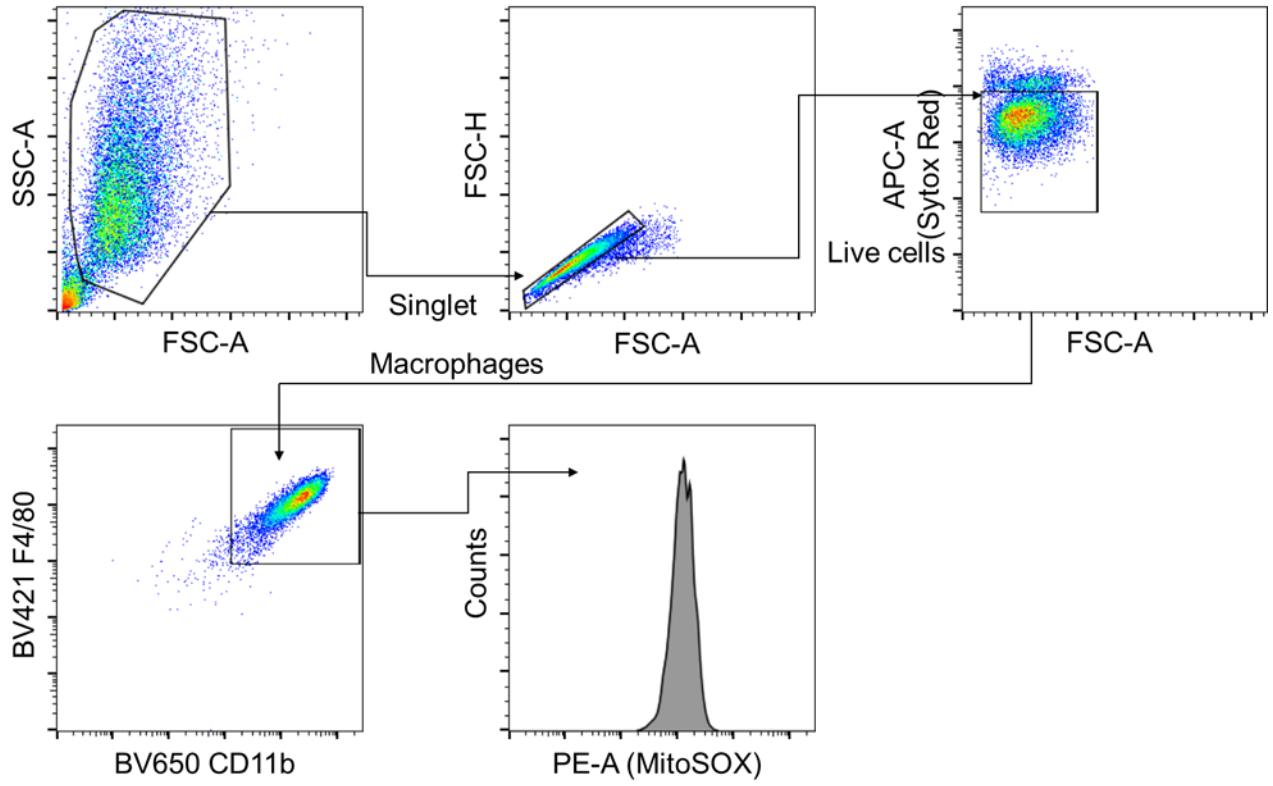

407

408 Macrophage MitoSOX measurement, Fig. 3e

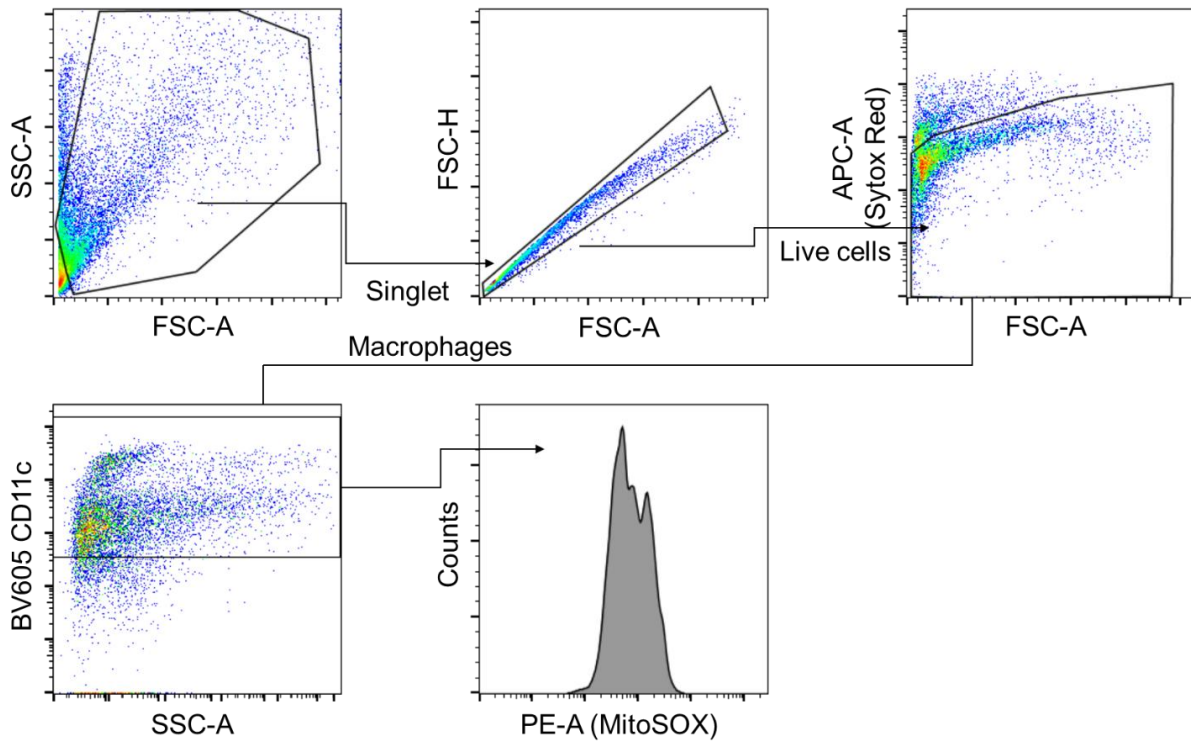

409

410 BMDC (bone marrow derived DCs) MitoSOX measurement, Fig. 3e.

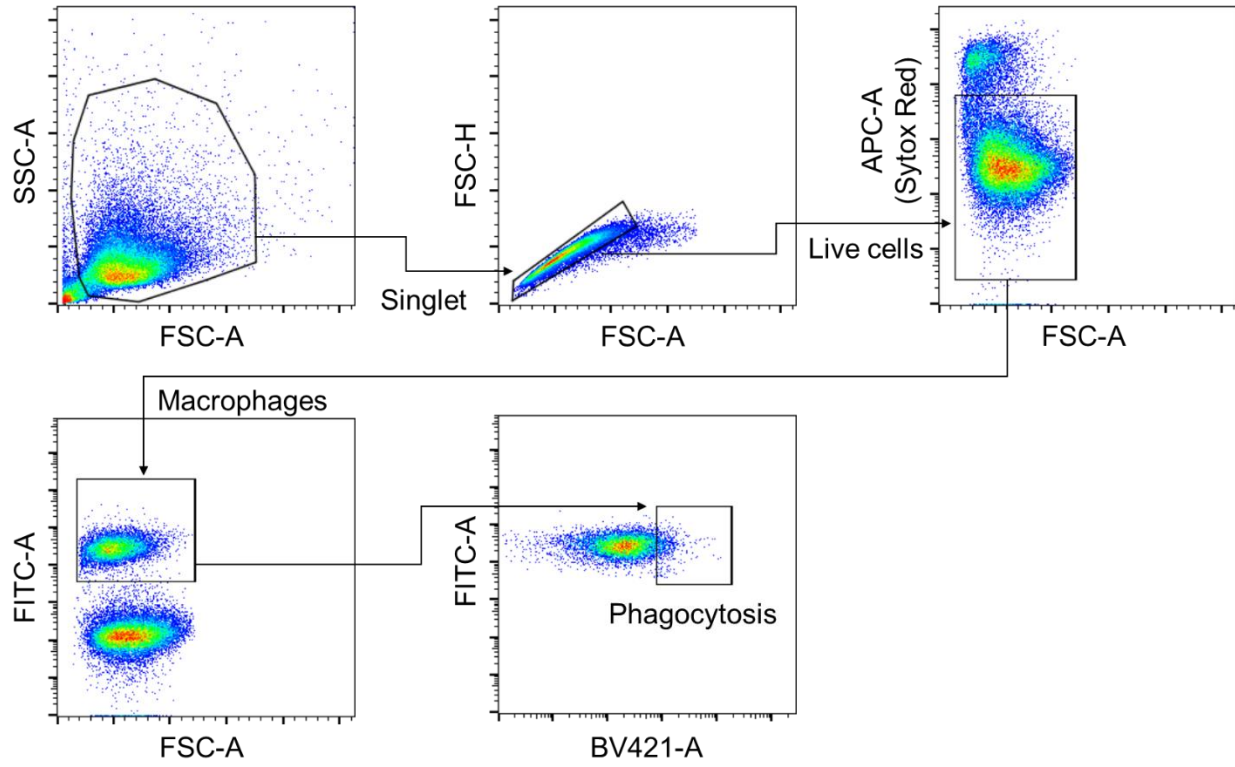

411

412

413 Macrophage phagocytosis assay, Fig. 4a, Supplementary Fig. 4d, 5d, 6d, 30.

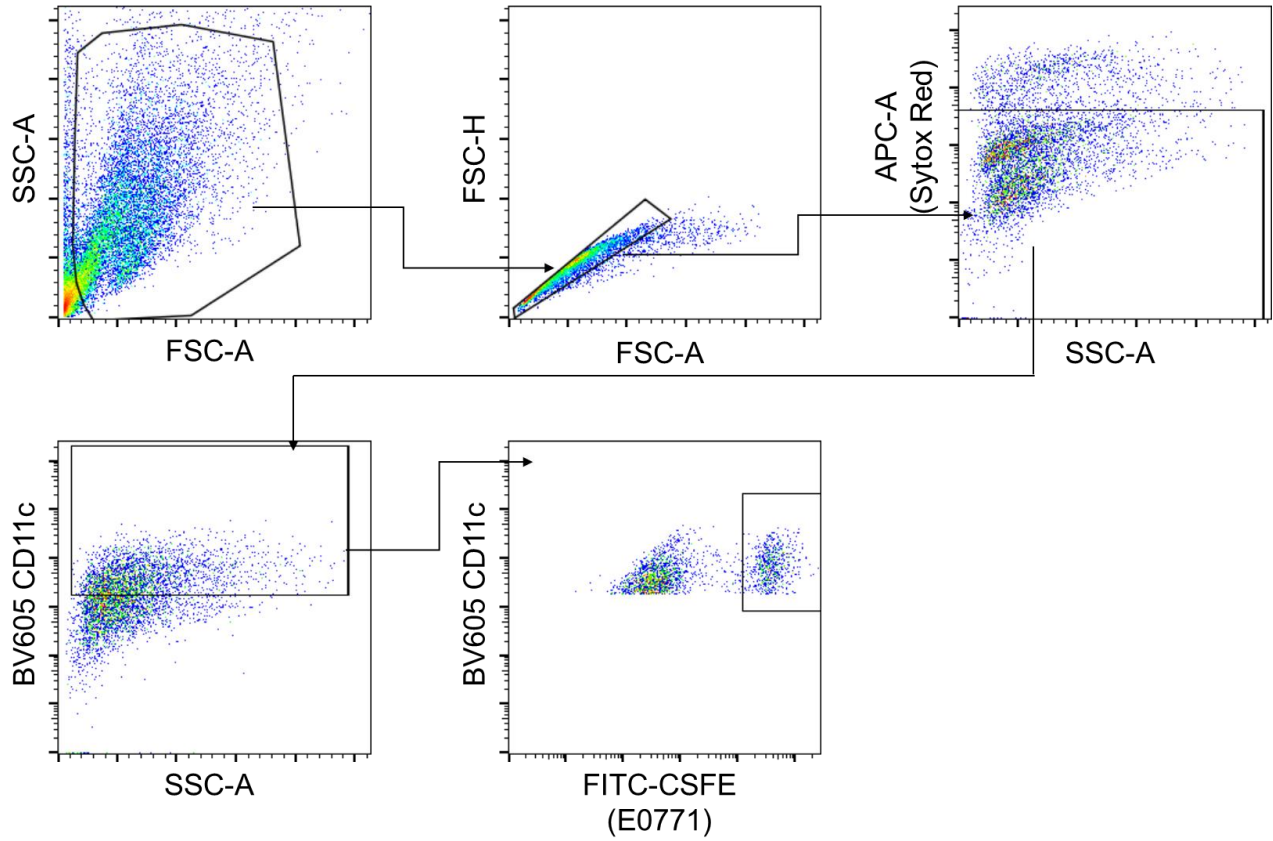

414

415 DC (dendritic cells) phagocytosis assay, Fig. 4a.

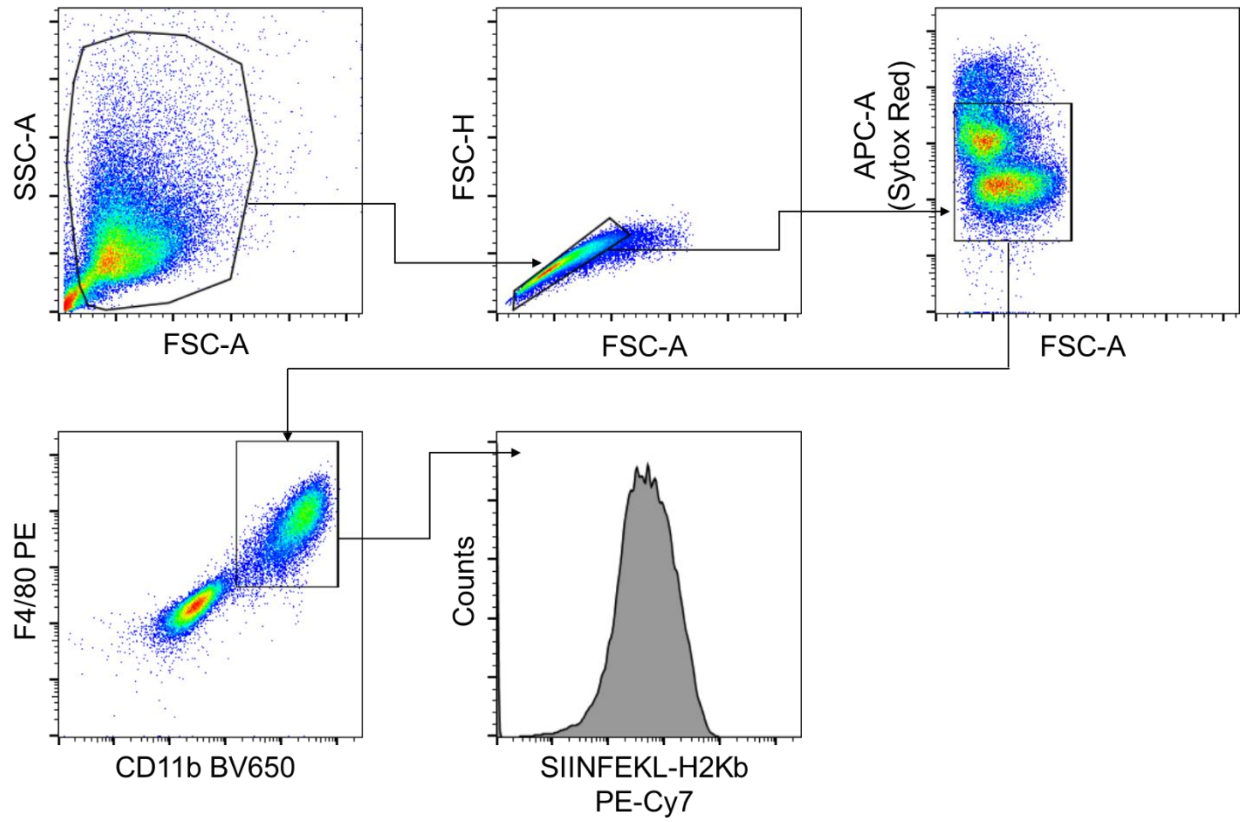

416

417 Macrophage antigen presentation, Fig. 4c and Supplementary Fig. 4e, 5e, 6e

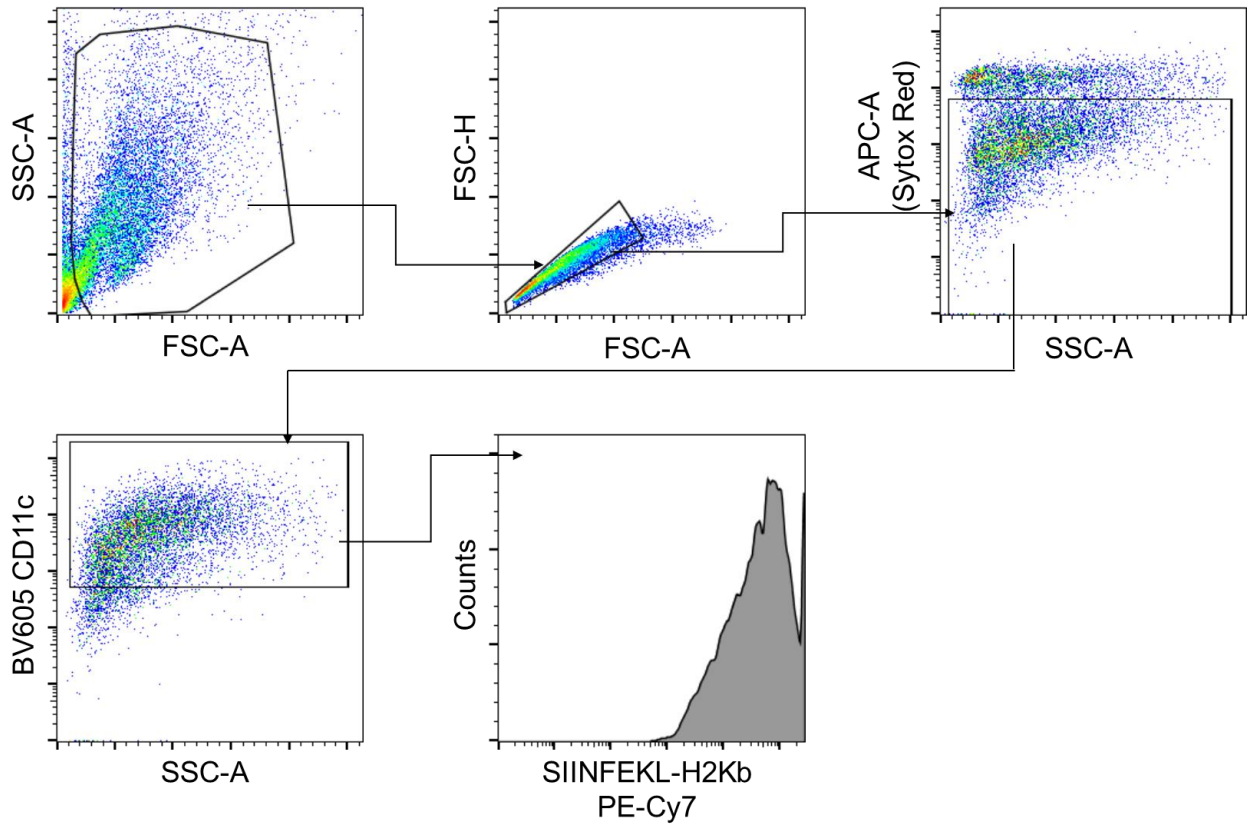

418

419 DC antigen presentation, Fig. 4c.



420

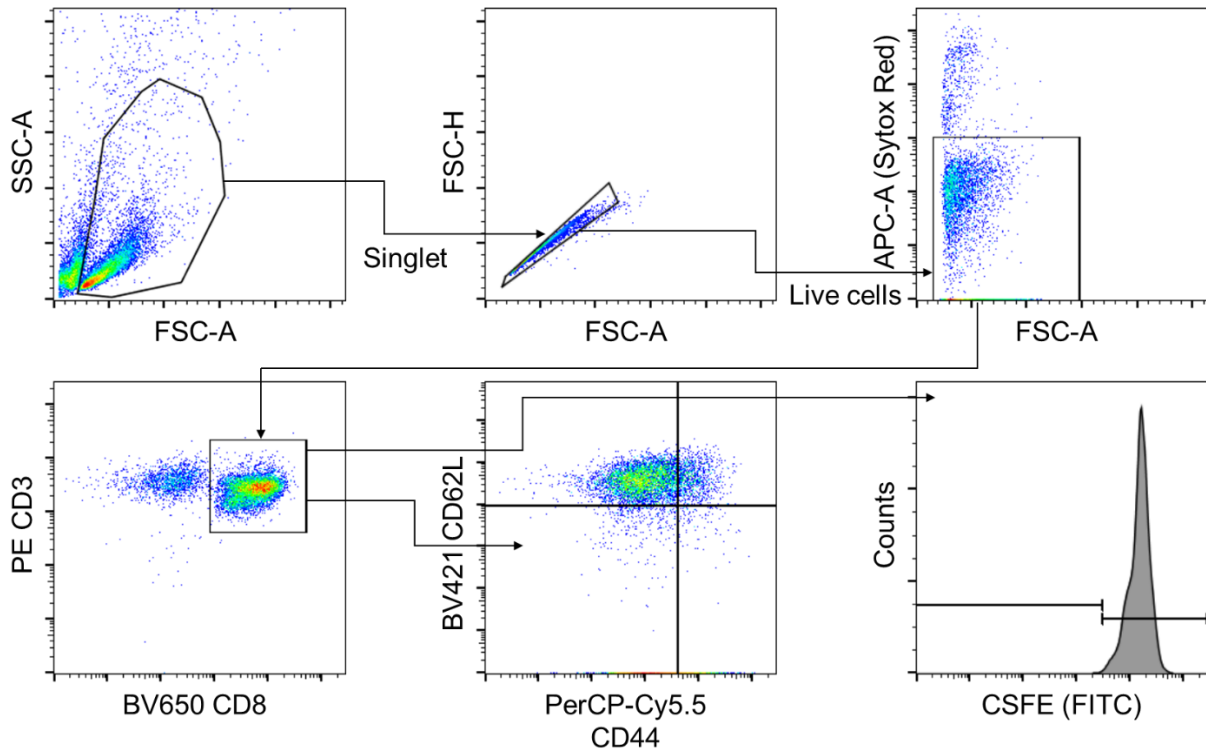

421

422 OT-I or OT-II proliferation and activation, Fig. 4f-h

### Tumor-infiltrating T cells

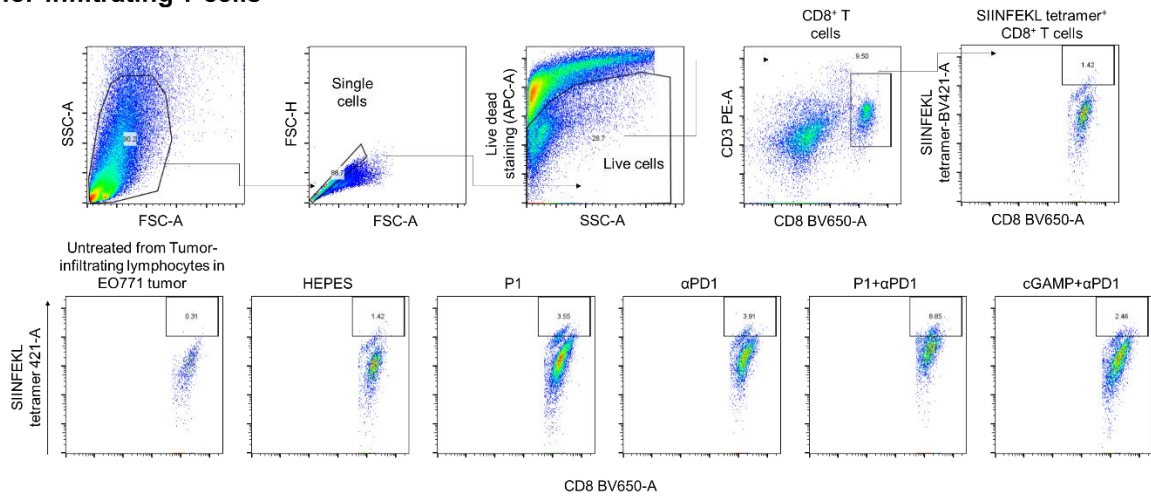

### Splenic T cells

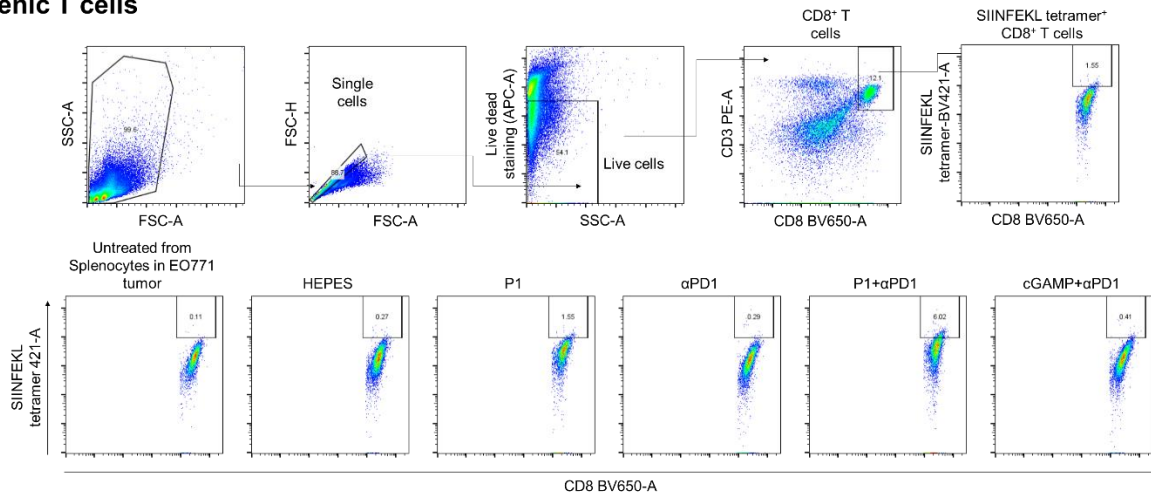

423

424 OVA tetramer staining, Fig. 5i,j

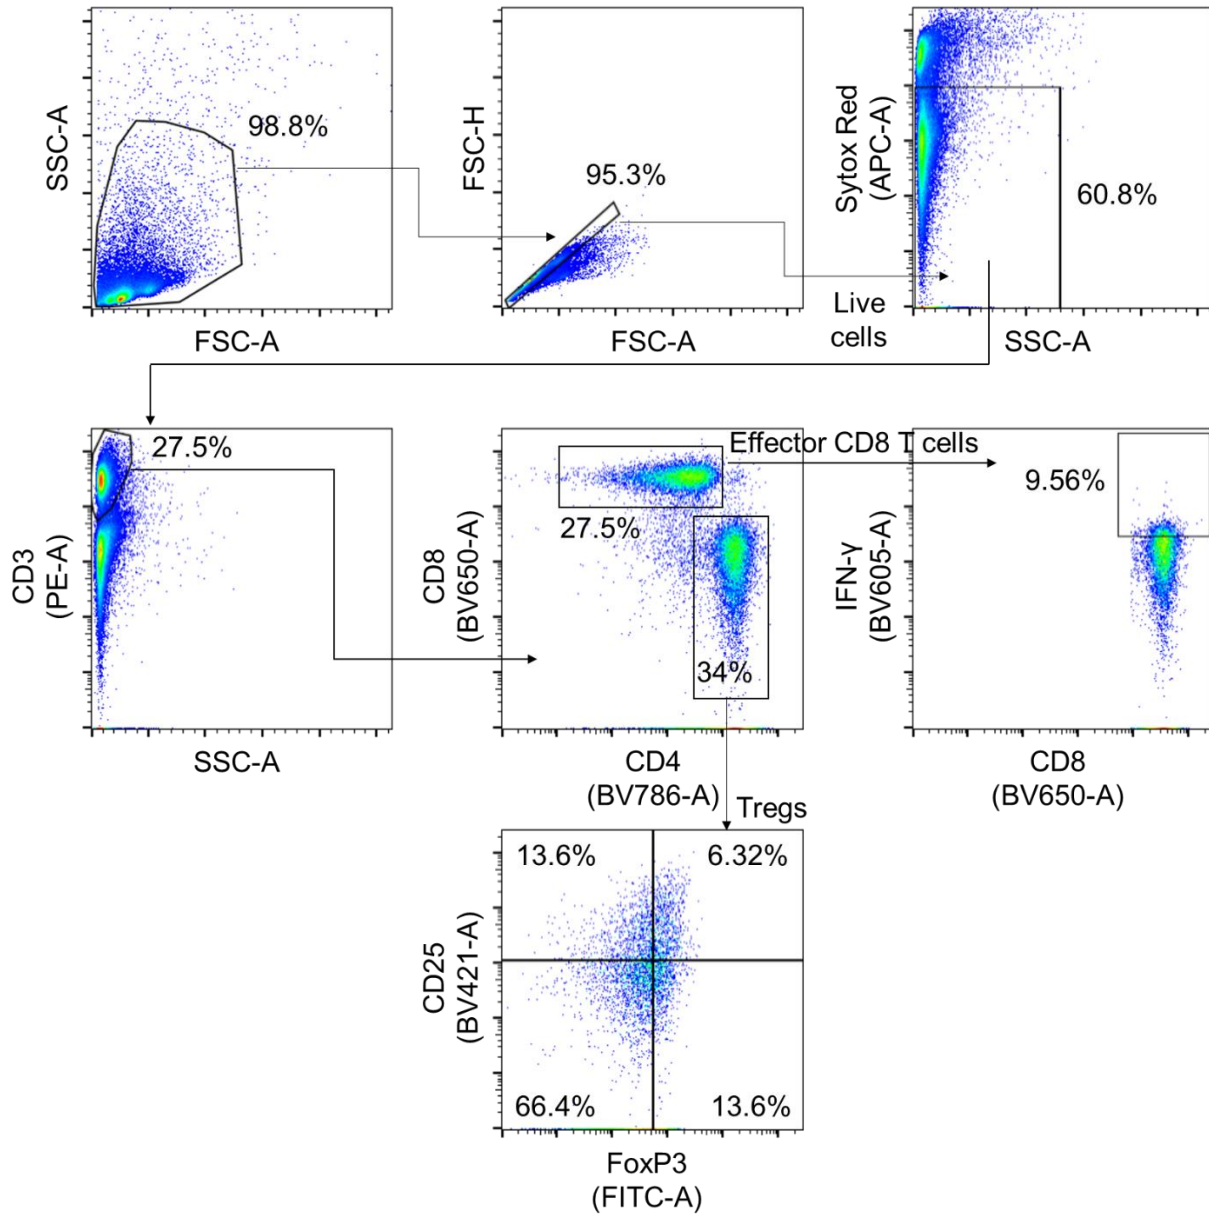

425

426 T cell gating in lymph nodes or spleen, Extended Fig. 3a

427

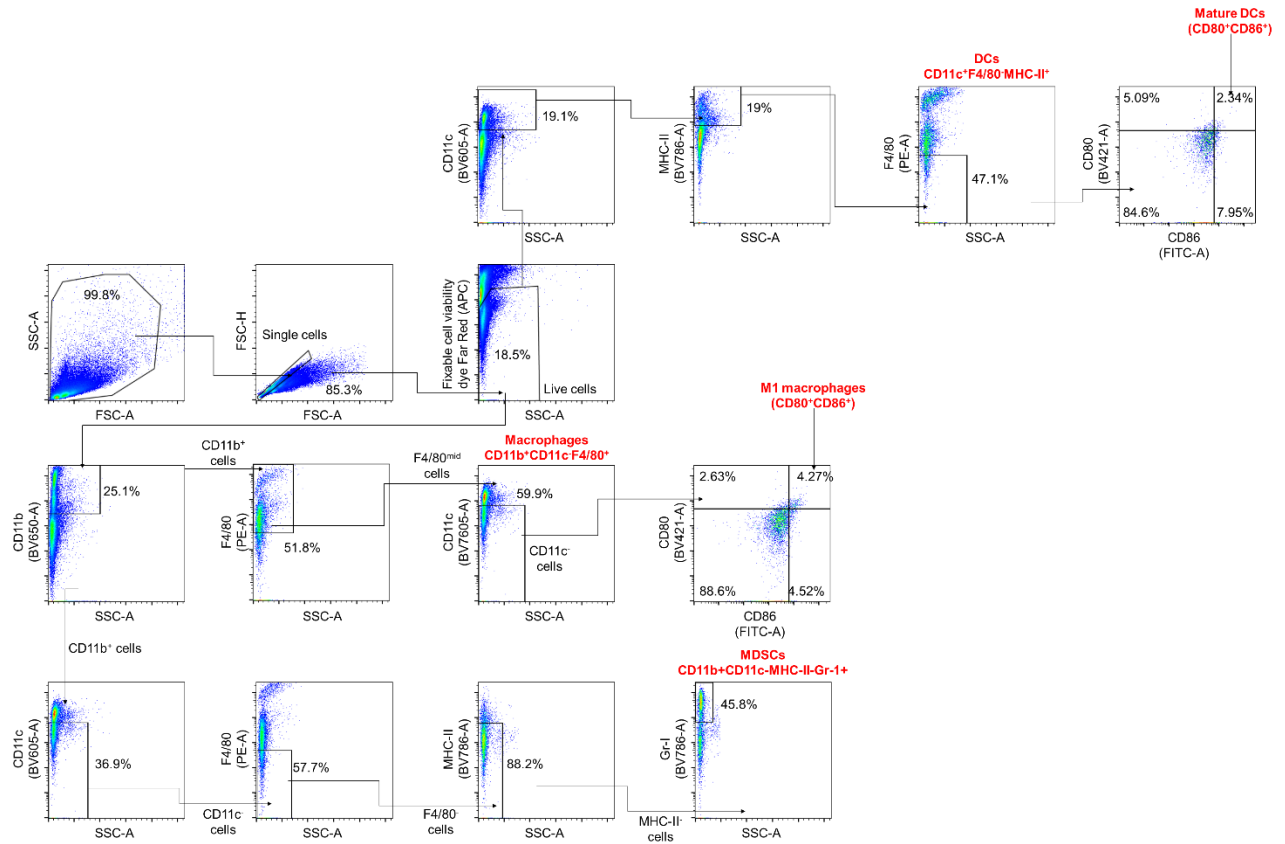

428

429 Myeloid cell gating in lymph nodes or spleen, Extended Fig. 3b

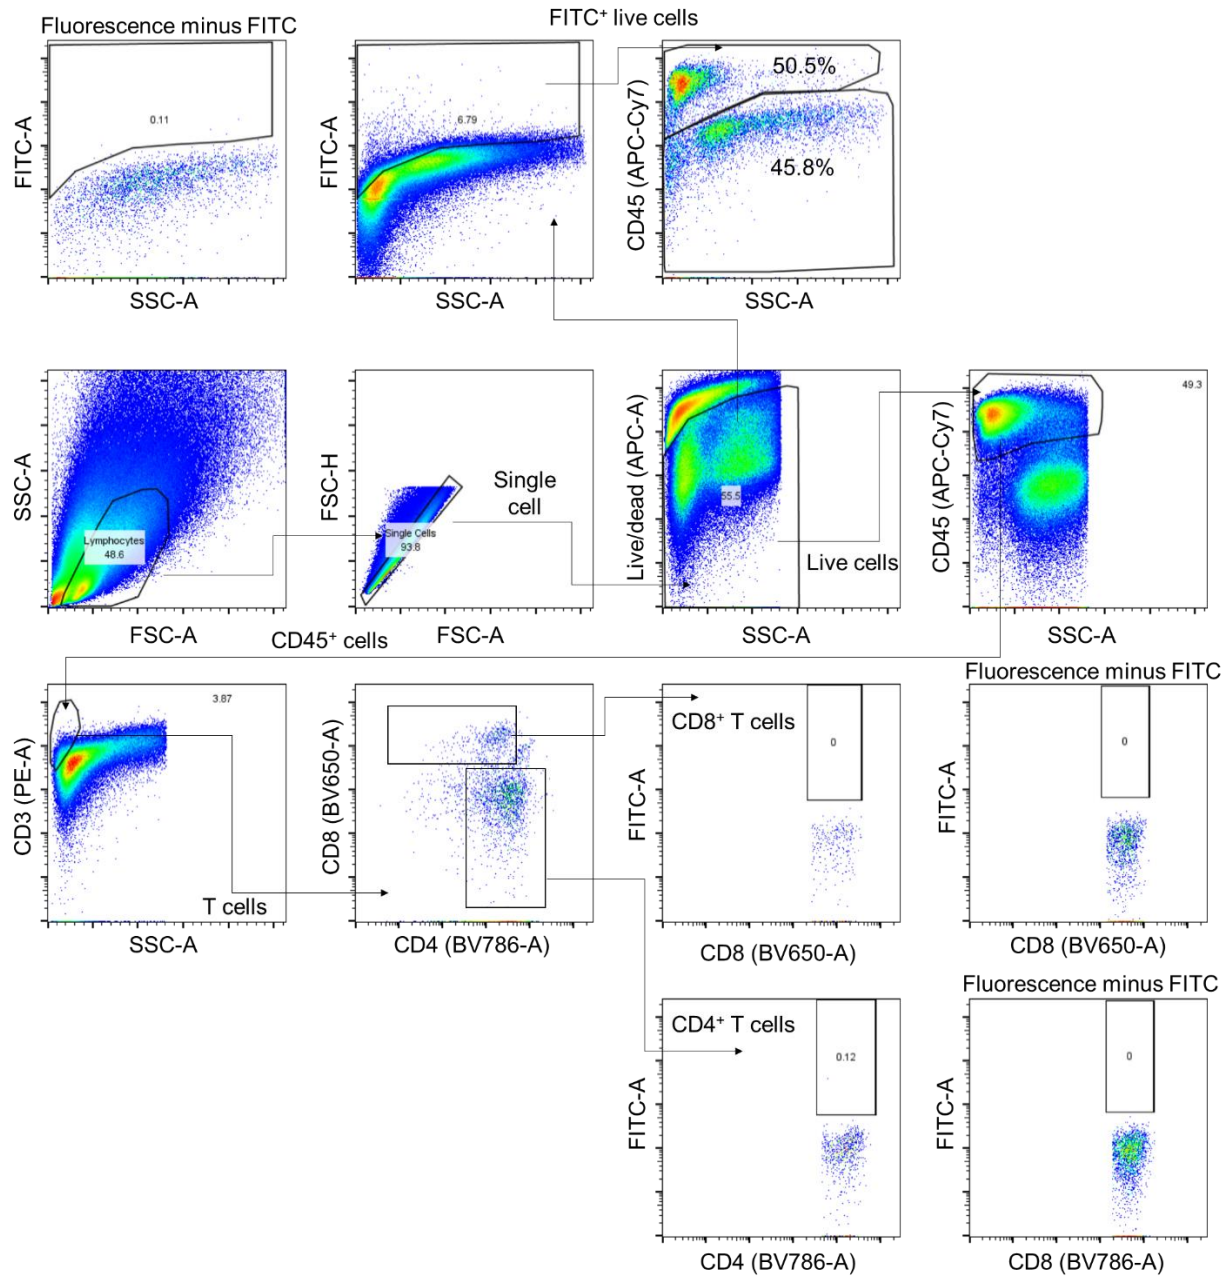

430

431 Gating strategies for FITC-P1 accumulation in CD45<sup>+</sup> or CD45<sup>-</sup> cells, and T cell subpopulations,  
 432 Supplementary Fig. 7.

433

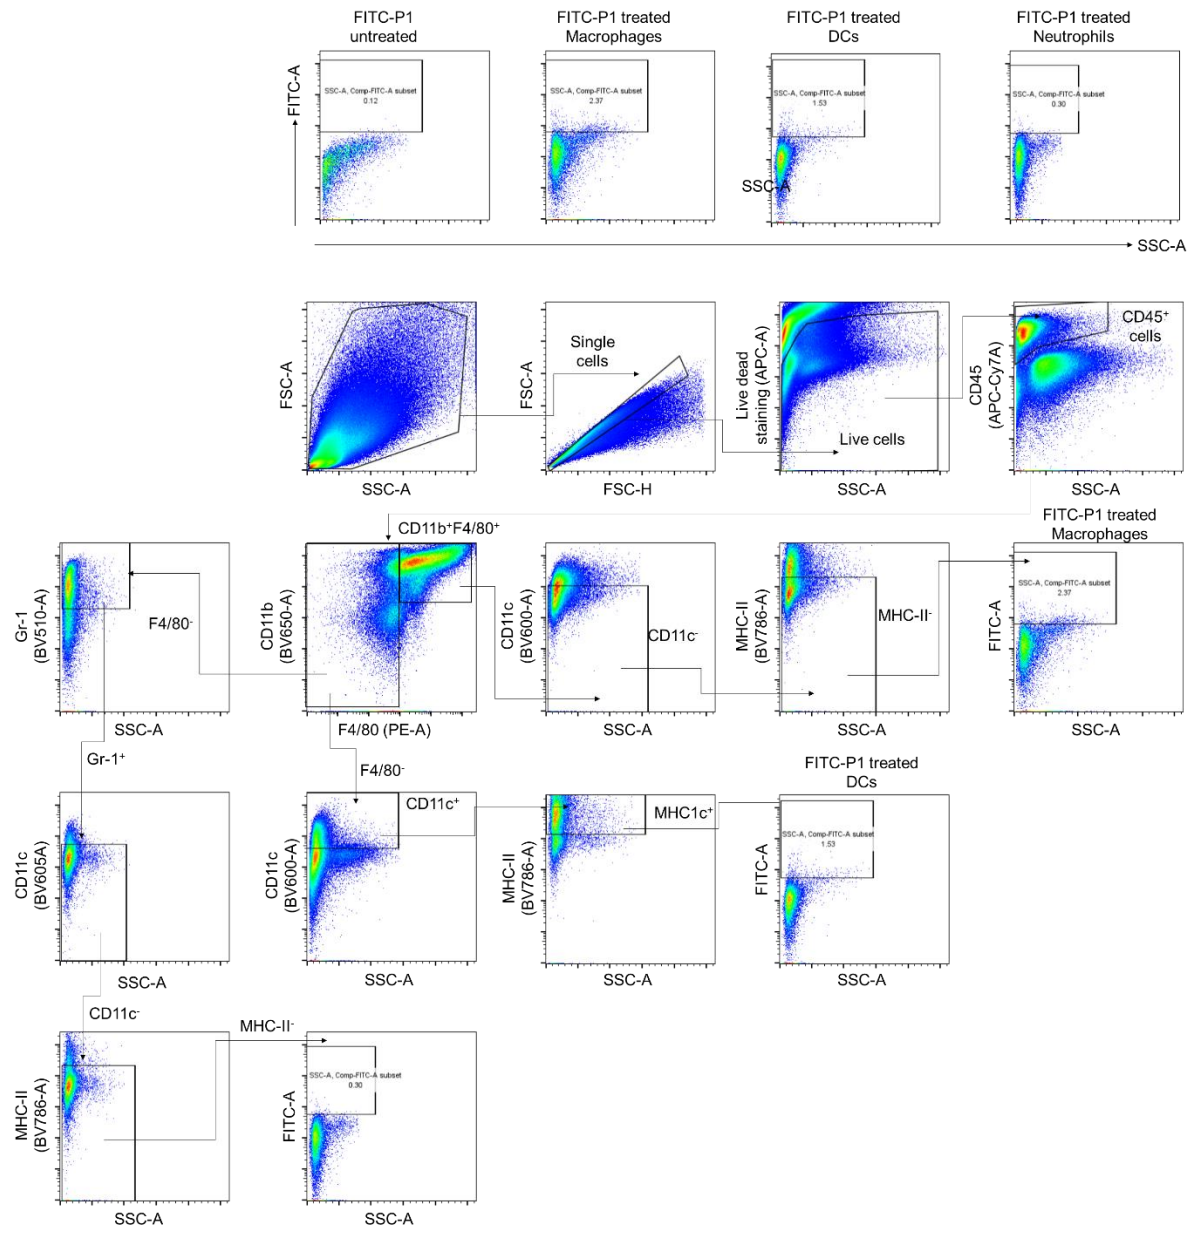

434

435 Gating strategies for FITC-P1 accumulation in myeloid cell subpopulations, Supplementary Fig.

436 7.

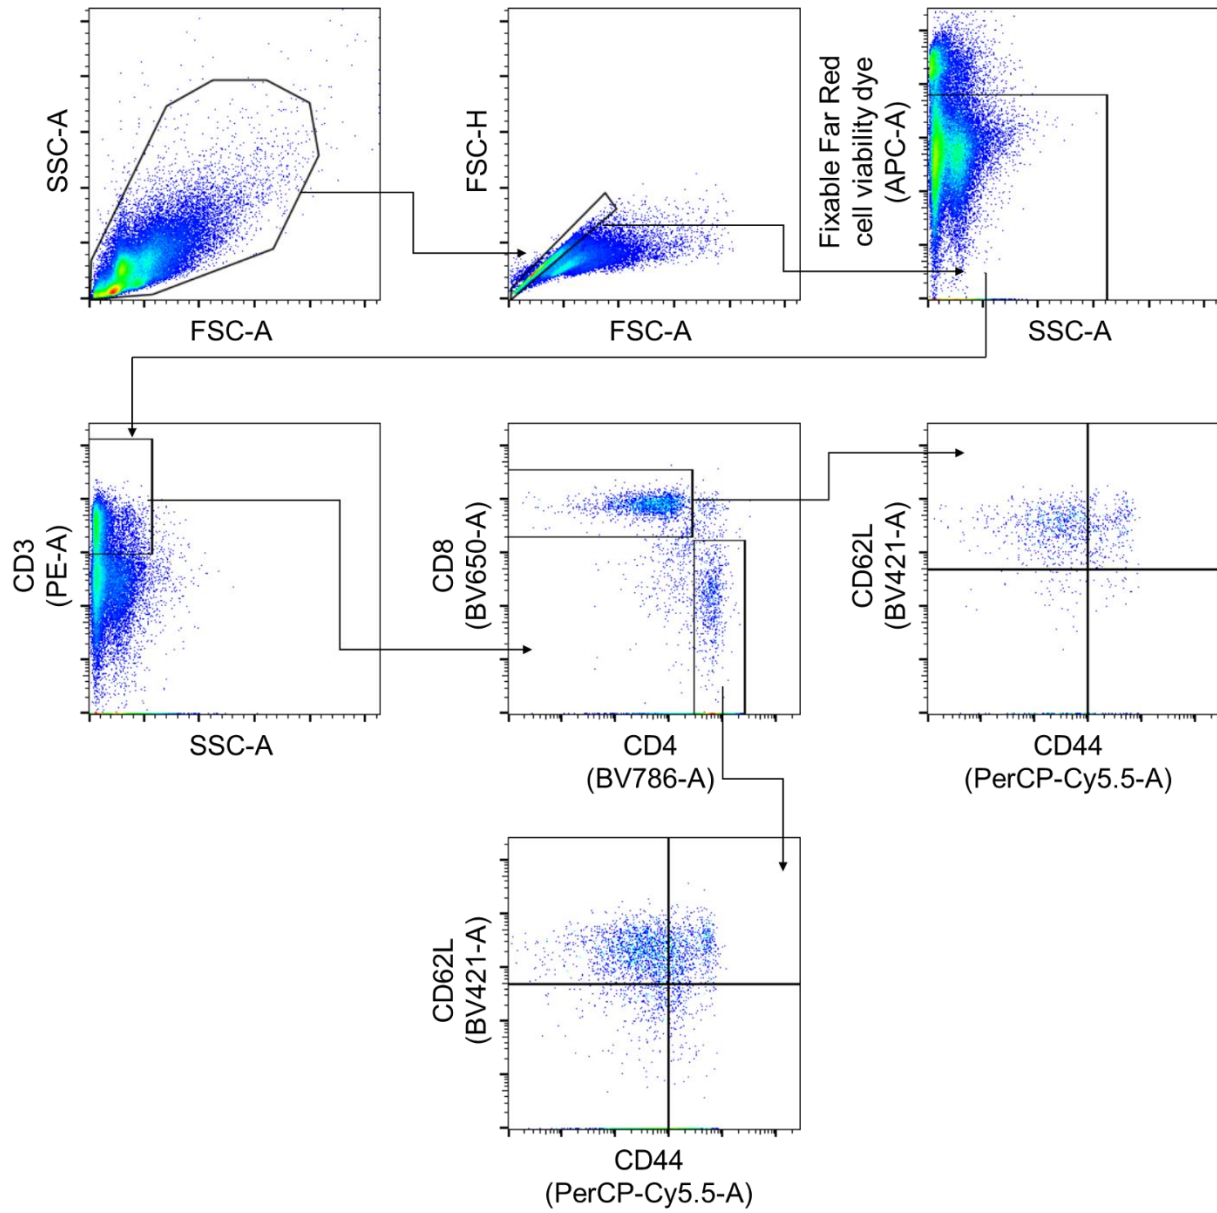

437

438

Splenic T cells *in vivo* for memory populations, Supplementary Fig. 16a, 34

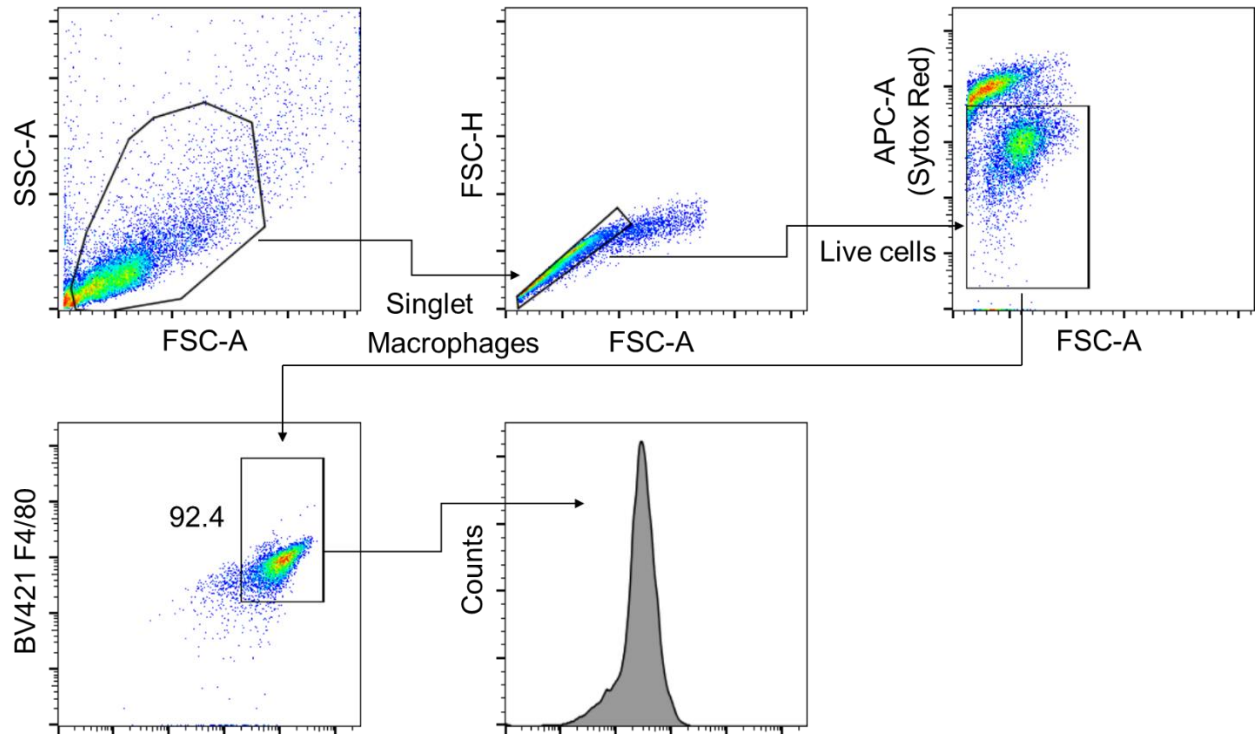

439

440 Membrane destabilization assay, Supplementary Fig. 20a.



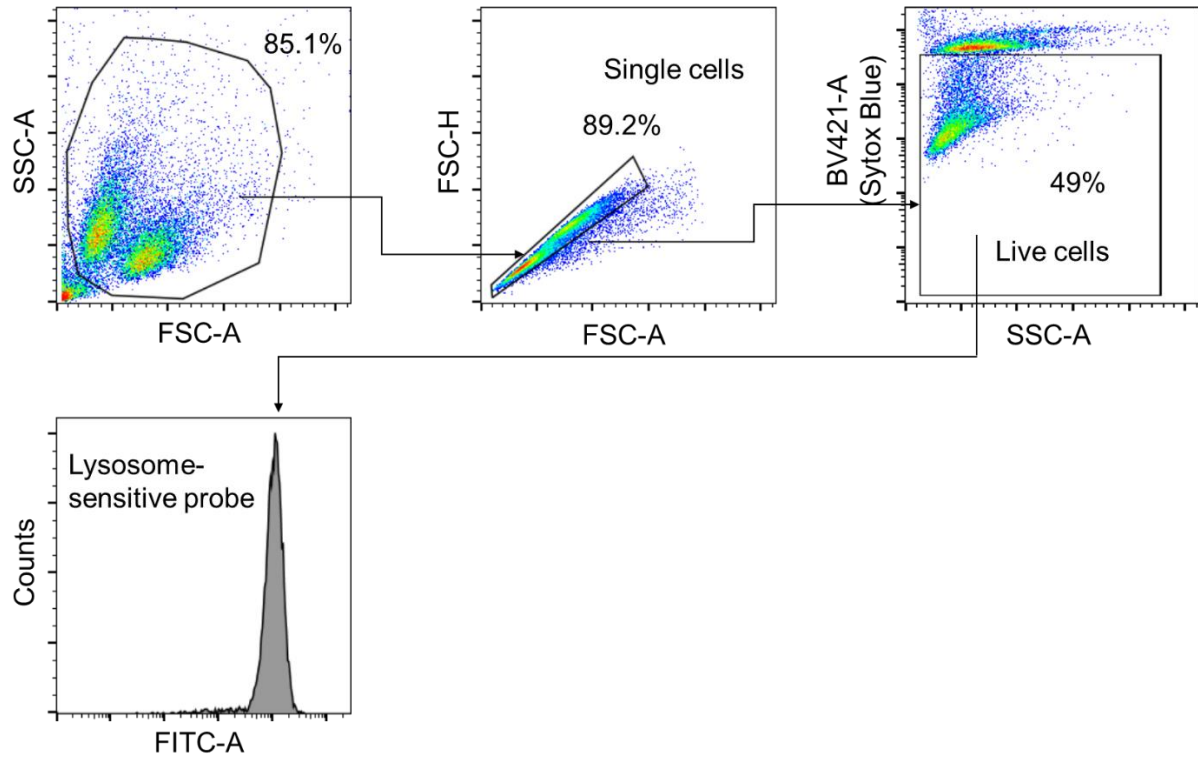

441

442 Intracellular lysosomal activity, Supplementary Fig. 20b.

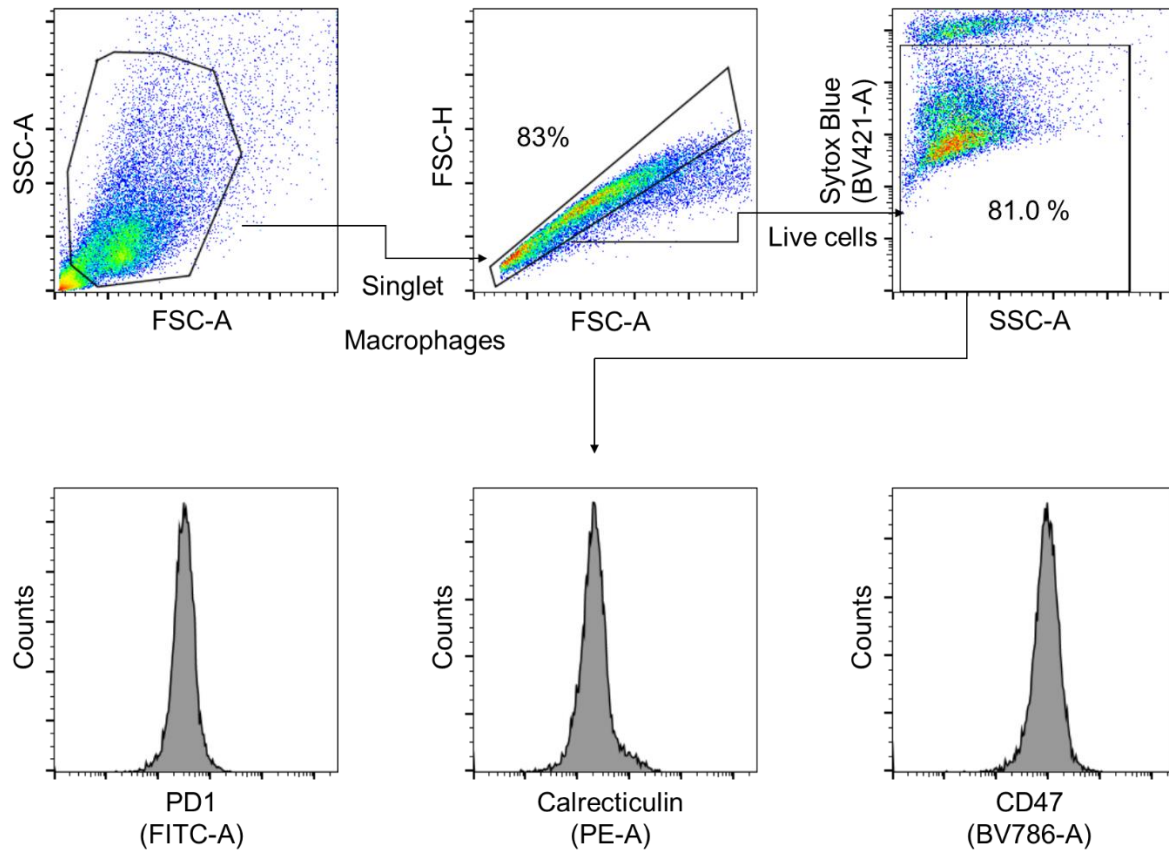

443

444 Expressions of PD1, Calrecticulin, CD47 in EO771 and 4T1, Supplementary Fig. 29. 

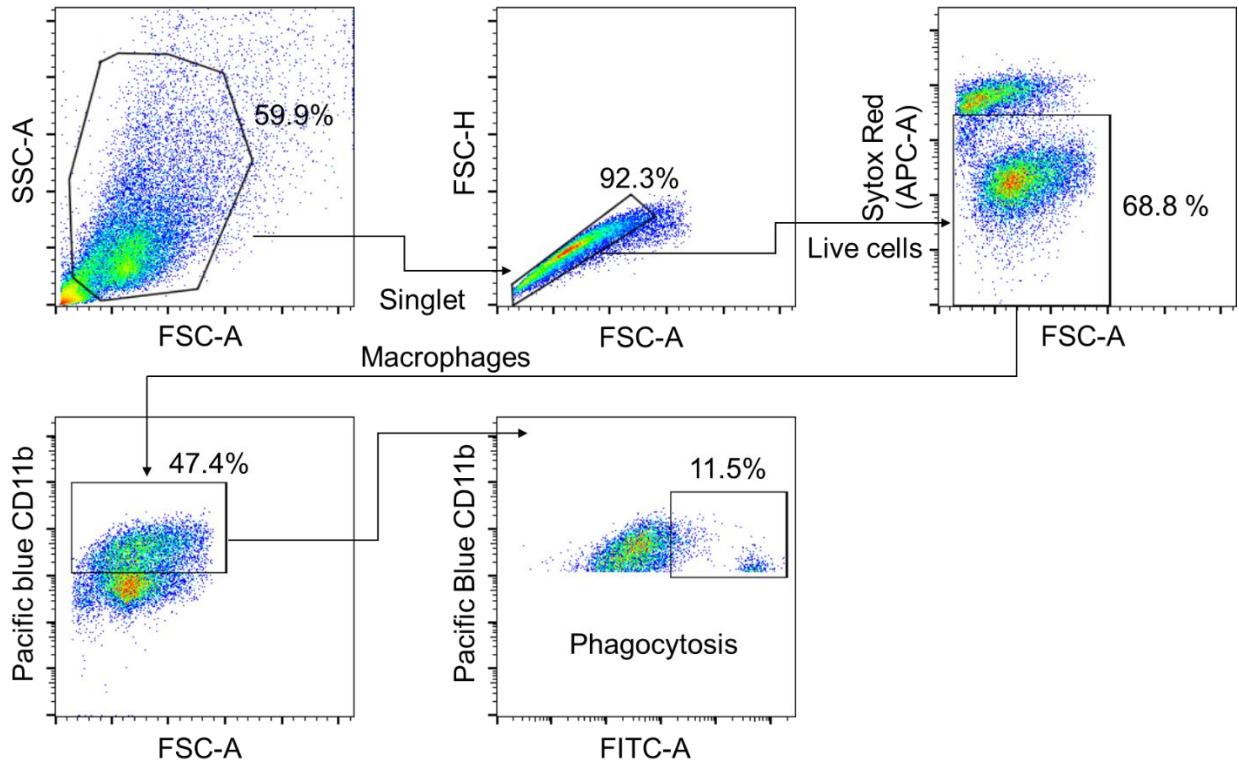

445

446 Phagocytosis assay using THP1-derived macrophages and SK-BR3, Supplementary Fig. 30. 

447

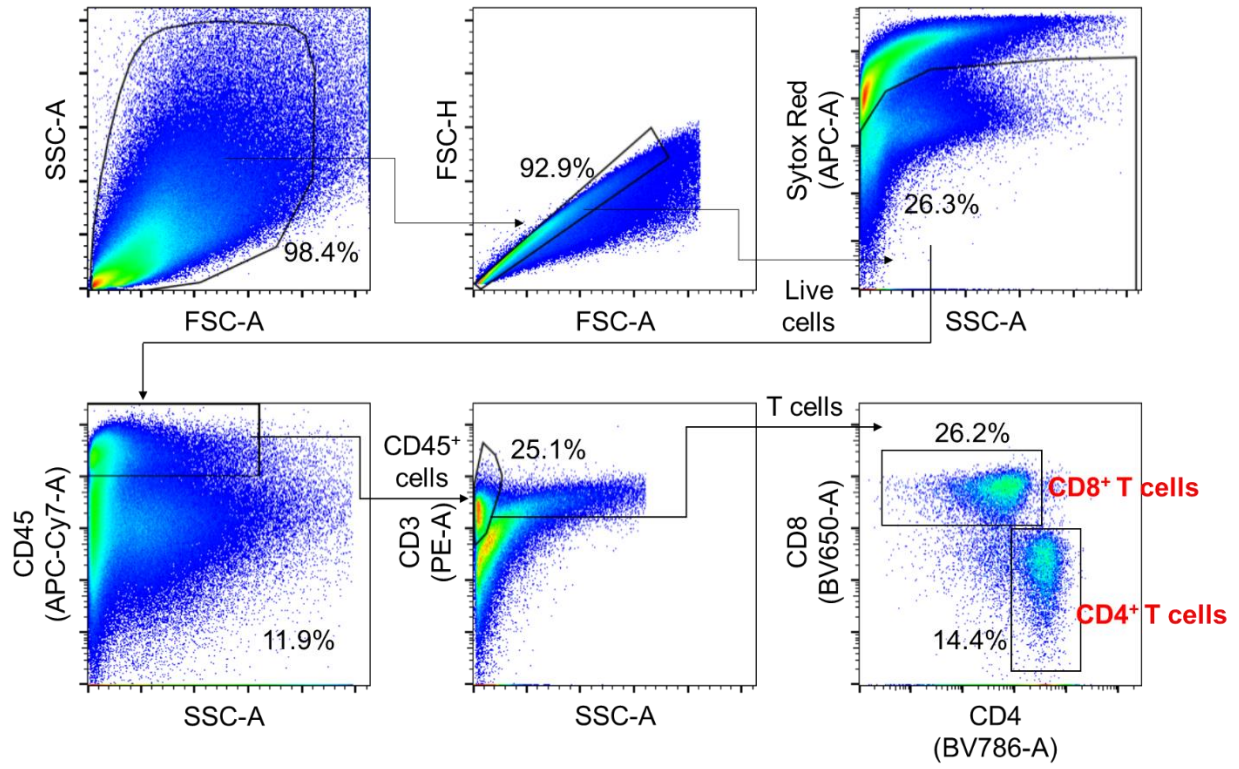

448

449 T cell gating without CD45 enrichment, Supplementary Fig. 33

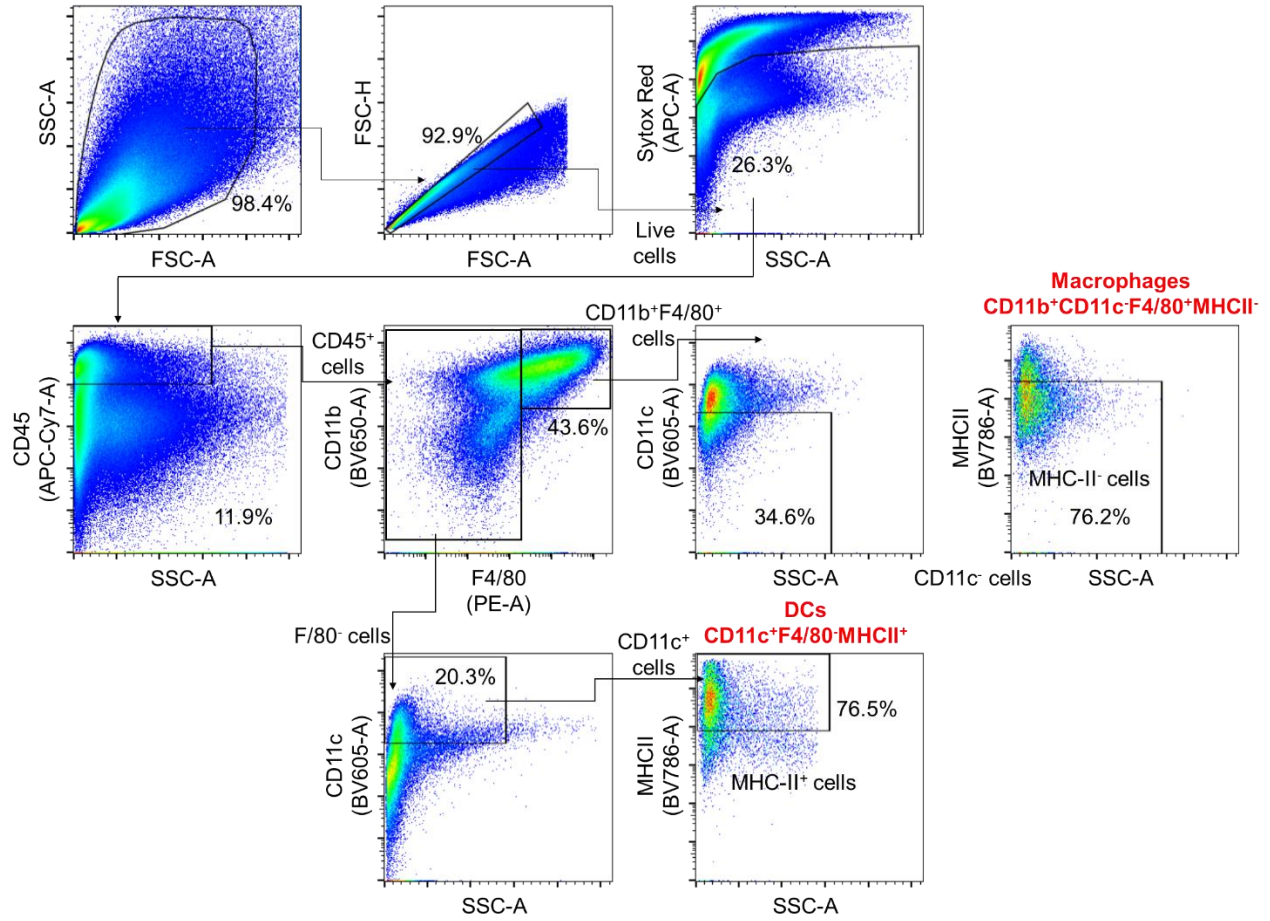

450

451 Myeloid cell gating without CD45 enrichment, Supplementary Fig. 33

452 **Uncropped western blot images**

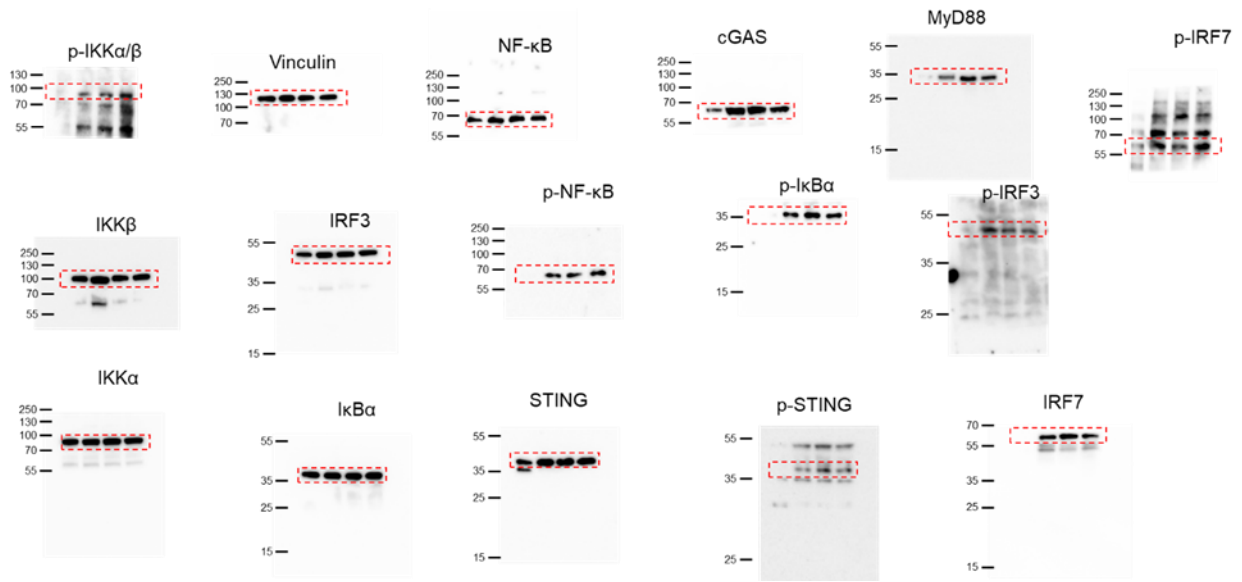

453

454 **Uncropped western blot images of M2 BMDMs in Fig. 3c**

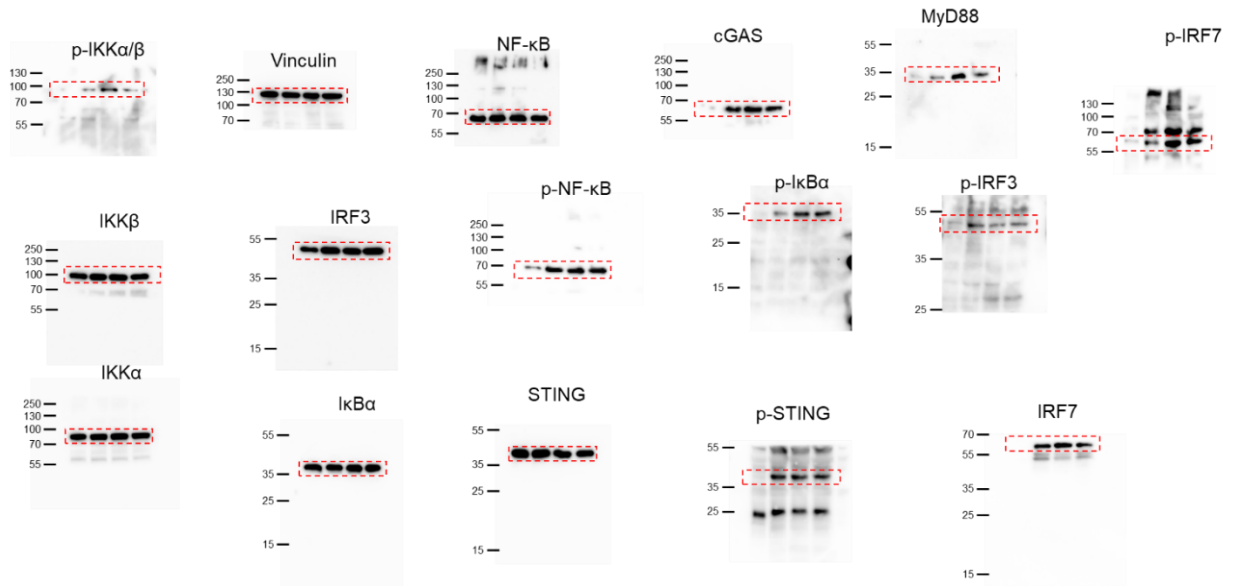

455

456 **Uncropped western blot images of BMDCs in Fig. 3c**

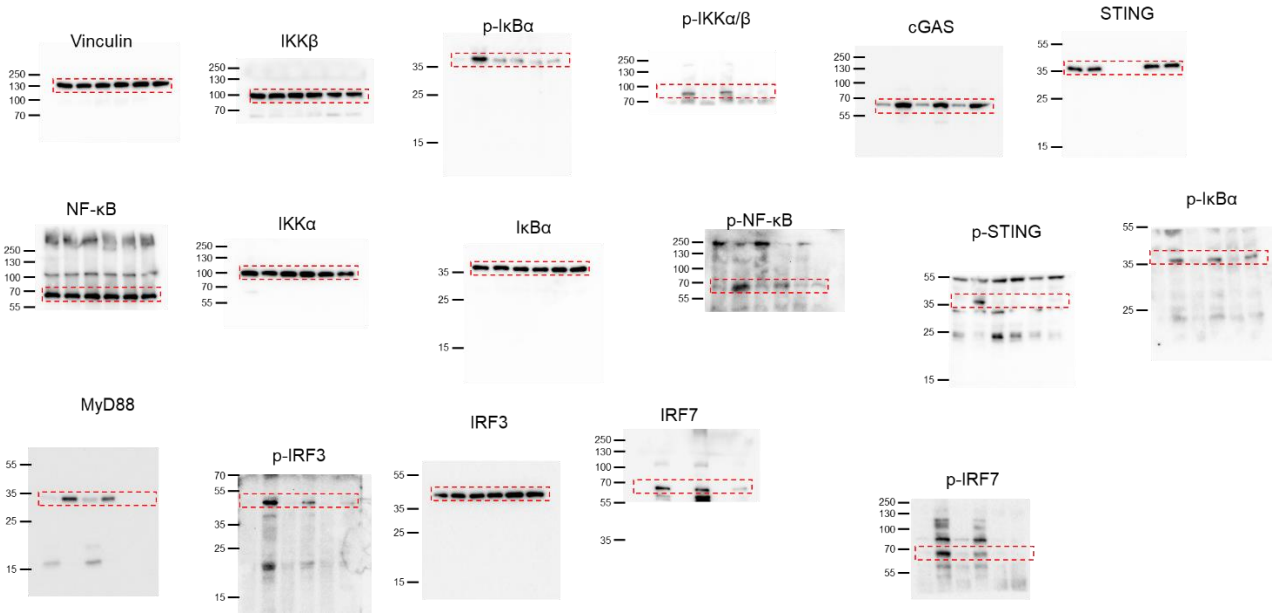

457

458 Uncropped western images of M2 BMDMs in Fig. 3g

459

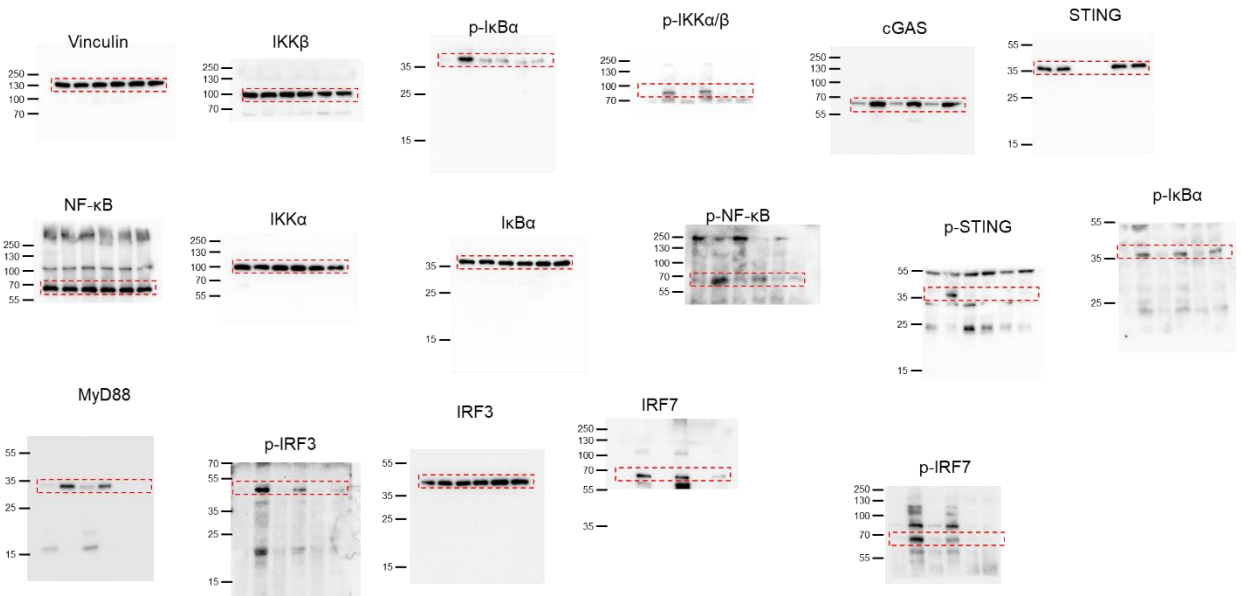

460

461 Uncropped western images of BMDCs in Fig. 3g

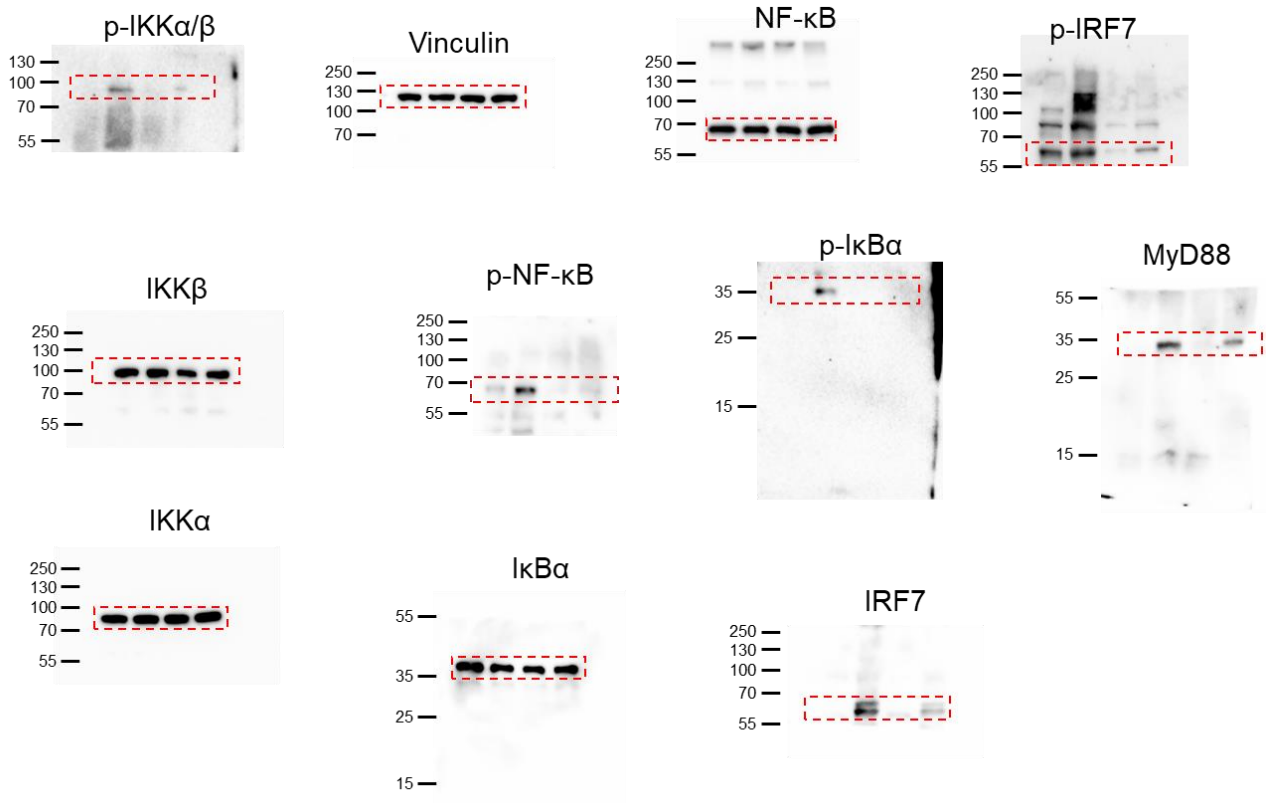

462

463 Uncropped western images of M2 BMDMs in Fig. 3i



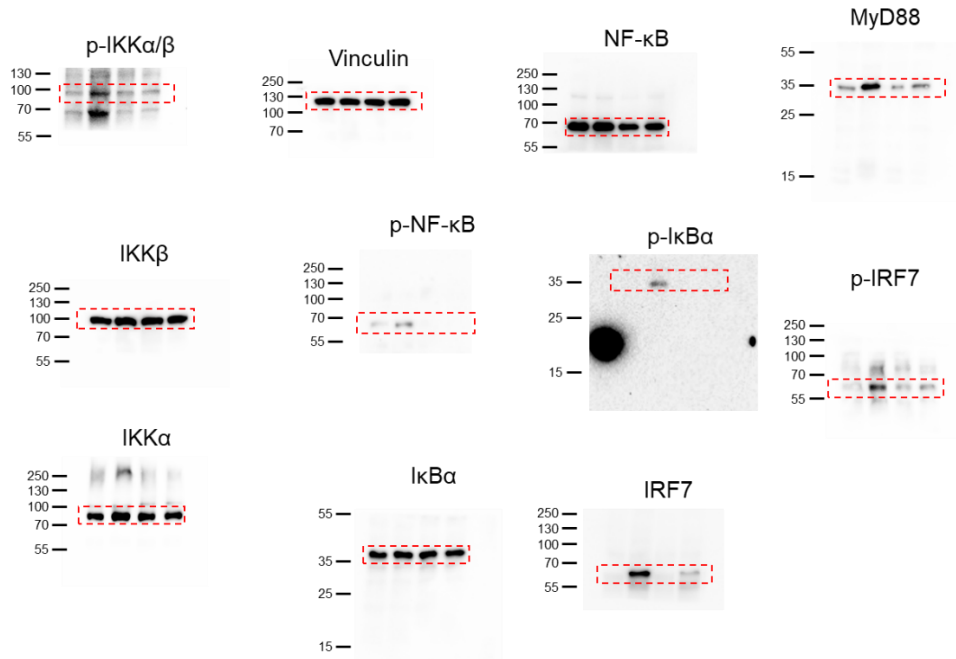

464

465 Uncropped western images of BMDCs in Fig. 3i

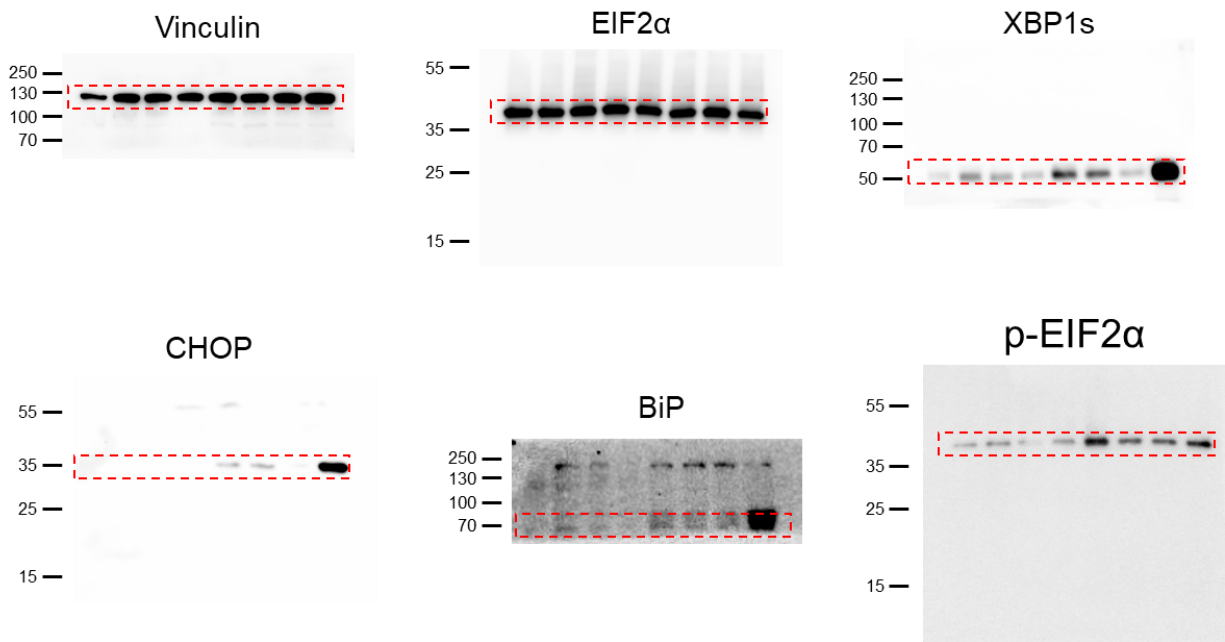

466

467 Uncropped western blot images in Extended Fig. 1b

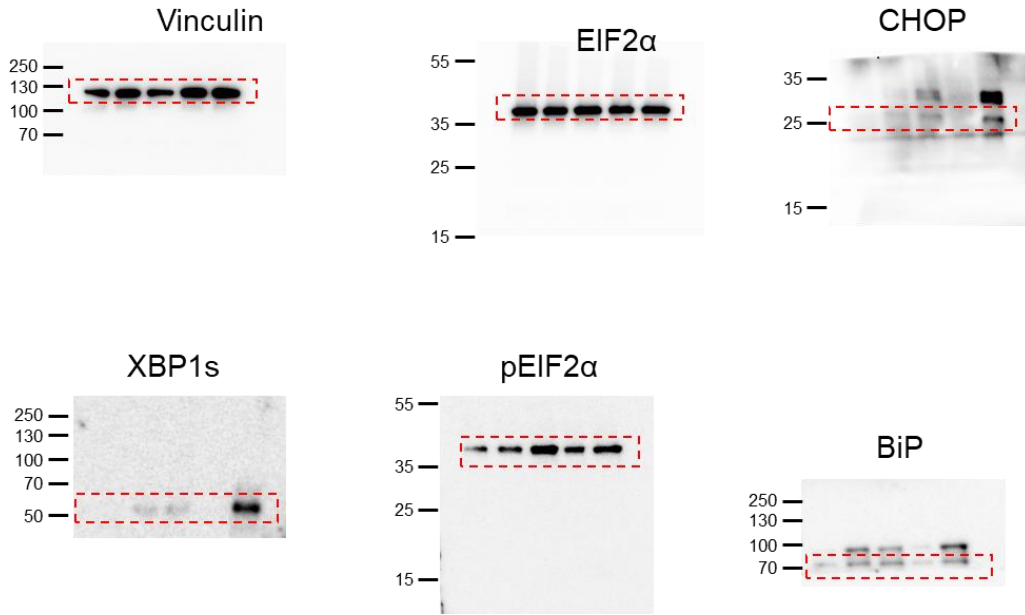

468

469 Uncropped western blot images in Extended Fig. 2b

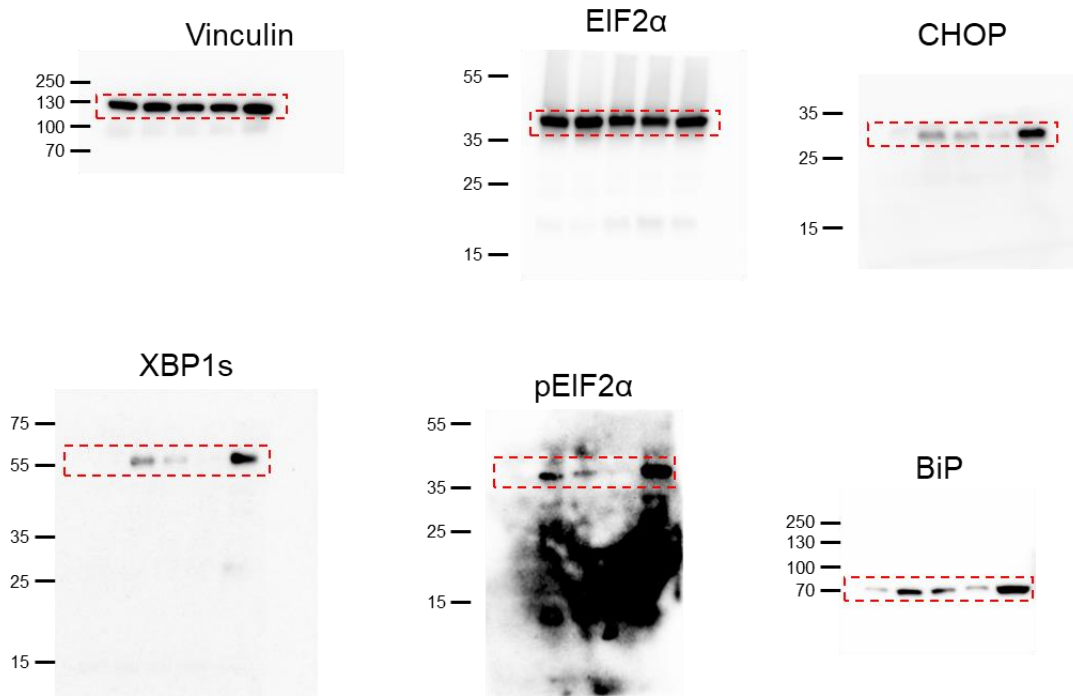

470

471 Uncropped western blot images in Extended Fig. 3b

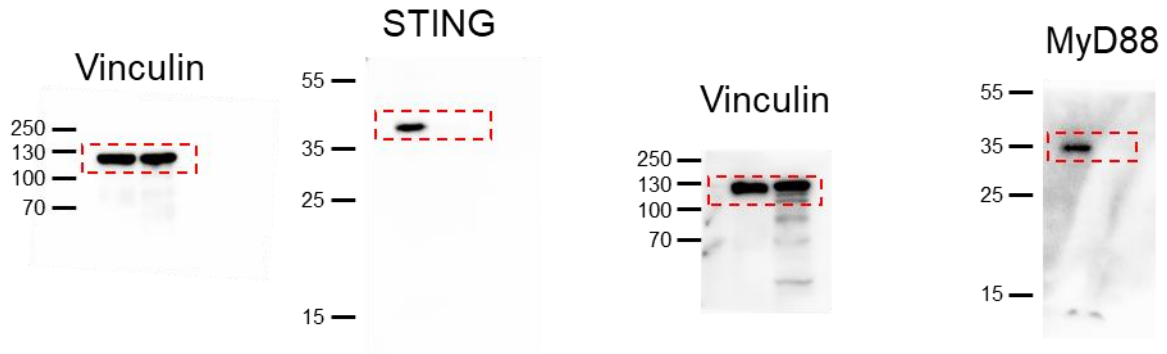

472

473 Uncropped western blot images in Extended Fig. 9a

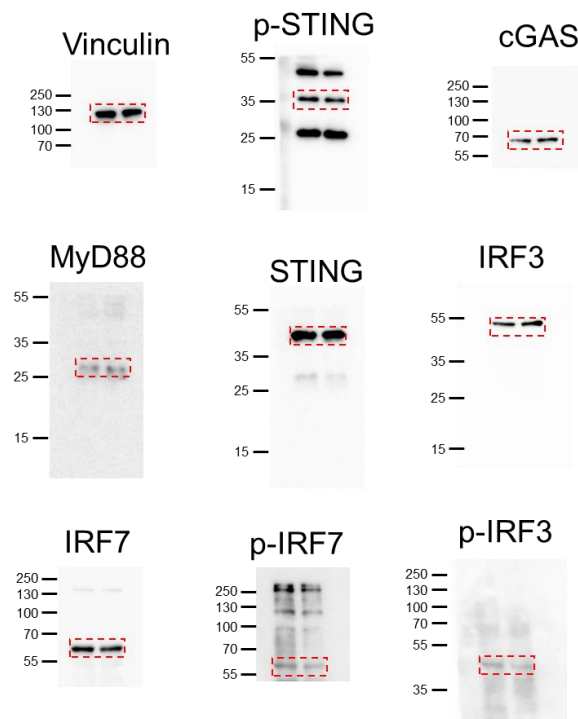

474

475 Uncropped western blot images in Supplementary Fig. 12a

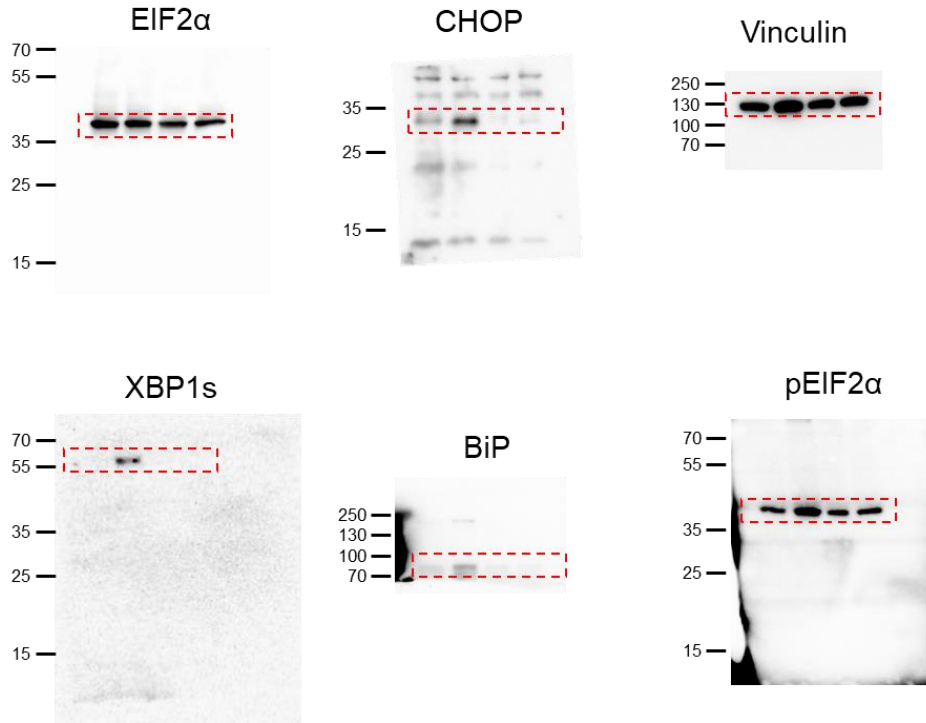

476

477 Uncropped western blot images in Supplementary Fig. 22b

478

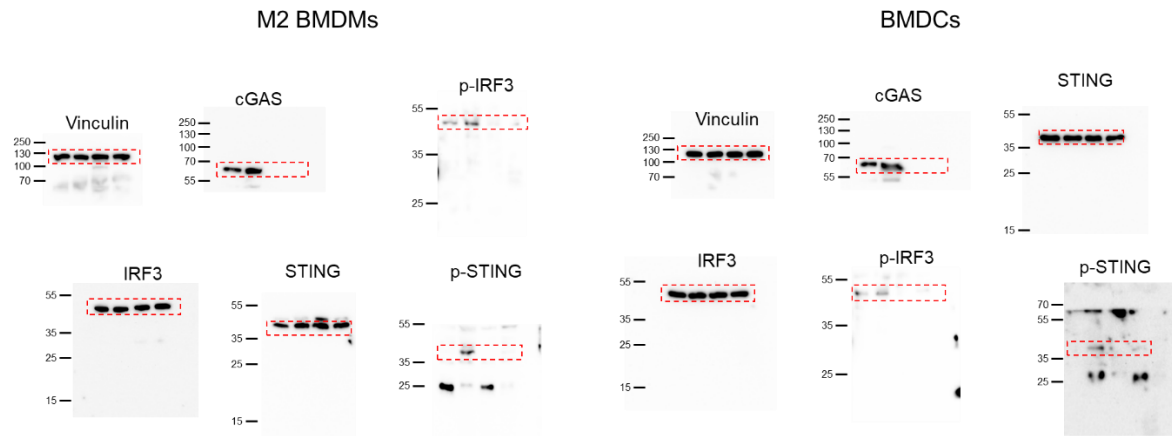

479

480 Uncropped western blot images in Supplementary Fig. 24

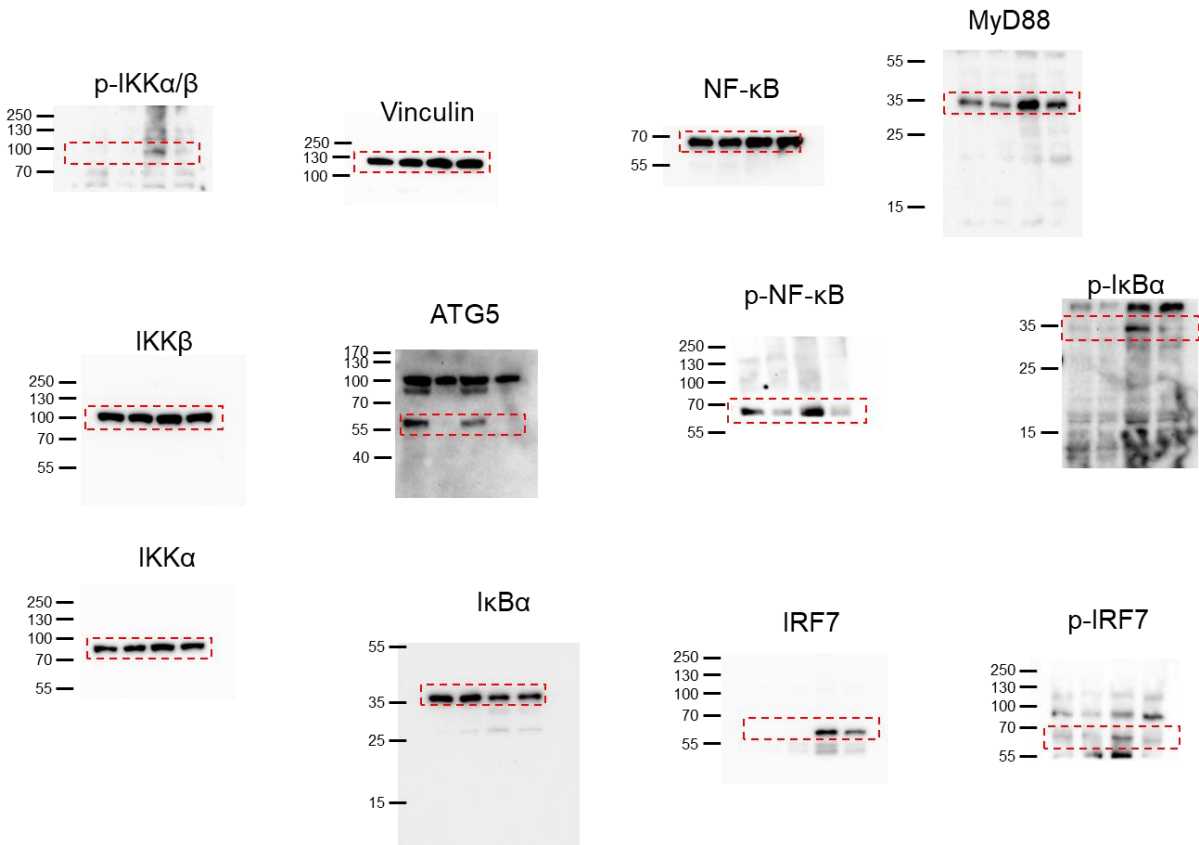

481

482 Uncropped western blot images in Supplementary Fig. 25b.

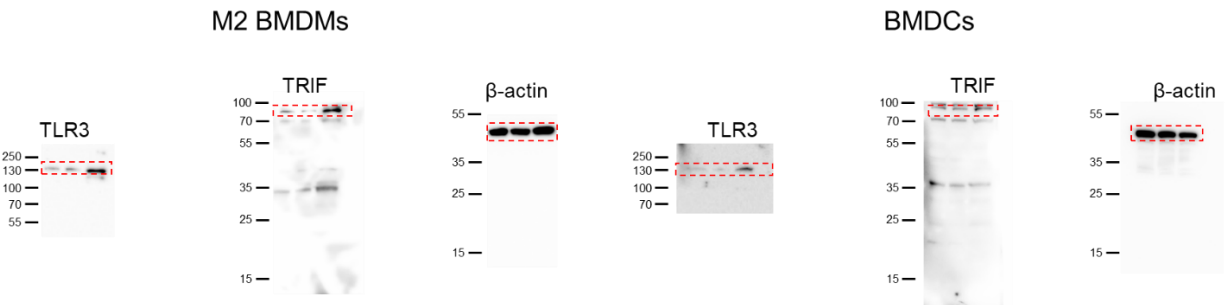

483

484 Uncropped western blot images in Supplementary Fig. 26.

## M2 BMDMs

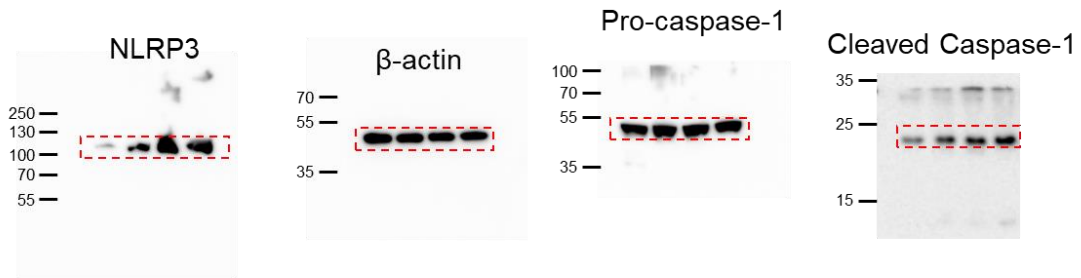

## BMDCs

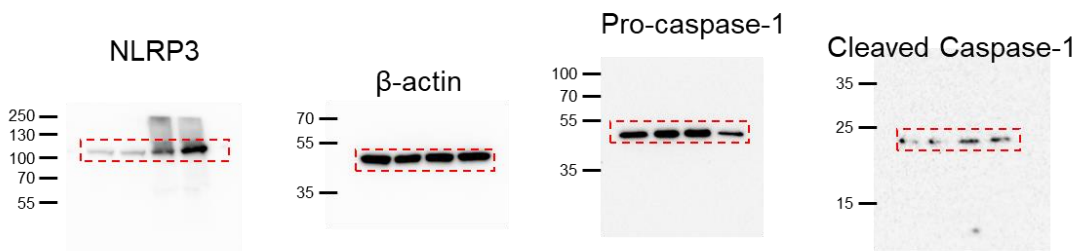

485

486 Uncropped western blot images in Supplementary Fig. 27a.

487

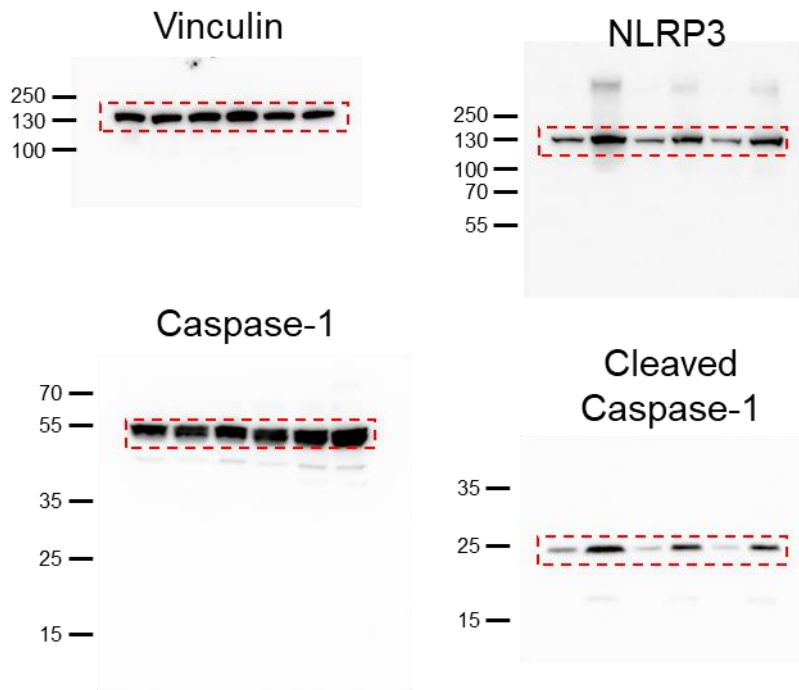

488

489 Uncropped western blot images in Supplementary Fig. 28a.

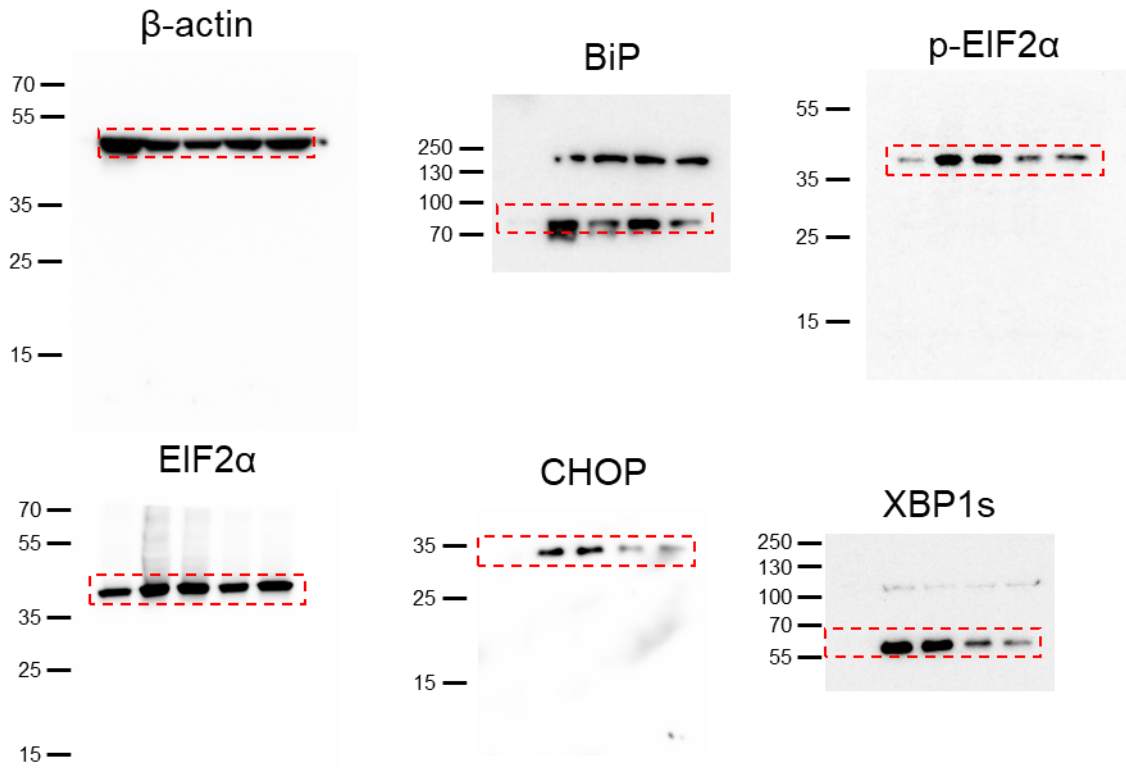

490

491 Uncropped western blot images in Supplementary Fig. 29a.

E0771

4T1

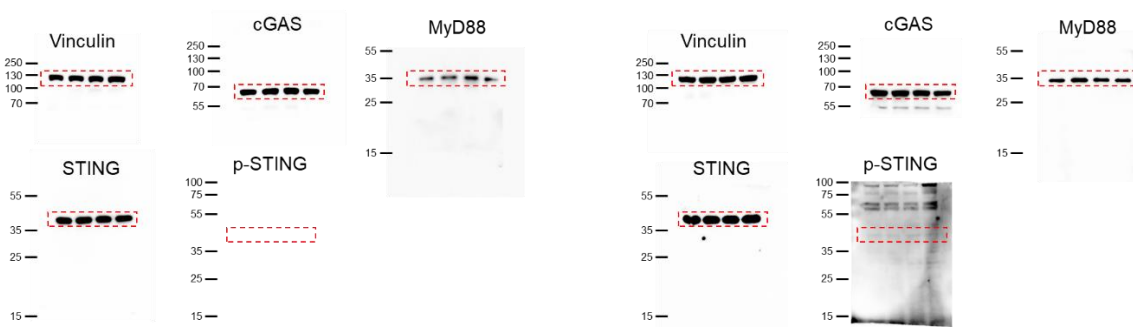

492

493 Uncropped western blot images in Supplementary Fig. 29c.

494

495 **Adjuvants used in this study**

496 2,'3'-cGAMP (Chemietek, USA)  
497 CpG-ODN 1585 (Boc Sciences, USA)  
498 LPS (Invitrogen, USA)  
499 ADU-S100 (Chemietek, USA)  
500 MSA2 (MedChemExpress, USA)

501

502 **Primers used for RT-qPCR**

503 Mouse *cd80* (Mm00711660\_m1, Taqman<sup>®</sup> assay, ThermoFisher Scientific, USA)  
504 Human *cd80* (Hs01045161\_m1, Taqman<sup>®</sup> assay, ThermoFisher Scientific, USA)  
505 Mouse *cd86* (Mm00444540\_m1, Taqman<sup>®</sup> assay, ThermoFisher Scientific, USA)  
506 Human *cd86* (Hs01567026\_m1, Taqman<sup>®</sup> assay, ThermoFisher Scientific, USA)  
507 Mouse *nos2* (Mm00440502\_m1, Taqman<sup>®</sup> assay, ThermoFisher Scientific, USA)  
508 Human *nos2* (Hs01075529\_m1, Taqman<sup>®</sup> assay, ThermoFisher Scientific, USA)  
509 Mouse *tnfa* (Mm00443258\_m1, Taqman<sup>®</sup> assay, ThermoFisher Scientific, USA)  
510 Human *tnfa* (Hs00174128\_m1, Taqman<sup>®</sup> assay, ThermoFisher Scientific, USA)  
511 Mouse *il1b* (Mm00434228\_m1, Taqman<sup>®</sup> assay, ThermoFisher Scientific, USA)  
512 Human *il1b* (Hs01555410\_m1, Taqman<sup>®</sup> assay, ThermoFisher Scientific, USA)  
513 Mouse *chil3* (Mm00657889\_mH, Taqman<sup>®</sup> assay, ThermoFisher Scientific, USA)  
514 Mouse *arg1* (Mm00475988\_m1, Taqman<sup>®</sup> assay, ThermoFisher Scientific, USA)  
515 Mouse *il10* (Mm01288386\_m1, Taqman<sup>®</sup> assay, ThermoFisher Scientific, USA)  
516 Human *il10* (Hs00961622\_m1, Taqman<sup>®</sup> assay, ThermoFisher Scientific, USA)  
517 Mouse *cd206* (Mm01329362\_m1, Taqman<sup>®</sup> assay, ThermoFisher Scientific, USA)  
518 Human *cd206* (Hs00267207\_m1, Taqman<sup>®</sup> assay, ThermoFisher Scientific, USA)  
519 Mouse *gapdh* (Mm99999915\_g1, Taqman<sup>®</sup> assay, ThermoFisher Scientific, USA)  
520 Human *gapdh* (Hs02786624\_g1, Taqman<sup>®</sup> assay, ThermoFisher Scientific, USA)  
521 Mouse *mtnd1* (Mm04225274\_s1, Taqman<sup>®</sup> assay, ThermoFisher Scientific, USA)  
522 Human *mtnd1* (Hs02596873\_s1, Taqman<sup>®</sup> assay, ThermoFisher Scientific, USA)  
523 Mouse *infa4* (Mm00833969\_s1, Taqman<sup>®</sup> assay, ThermoFisher Scientific, USA)  
524 Mouse *ifnb1* (Mm00439552\_s1, Taqman<sup>®</sup> assay, ThermoFisher Scientific, USA)  
525 Mouse *xbp1s* (Mm03464496\_m1, Taqman<sup>®</sup> assay, ThermoFisher Scientific, USA)  
526 Mouse *xbp1u* (Mm00457357\_m1, Taqman<sup>®</sup> assay, ThermoFisher Scientific, USA)

527



528 **Fluorophore-labelled antibodies or tetramer used for flow cytometry**  
529 Anti-mouse CD16/32 antibody (Clone: 93, Catalog #:101301, Biolegend, USA)  
530 BV650 anti-mouse CD11b antibody (Clone: M1/70, Catalog #: 101259, Biolegend, USA)  
531 BV421 anti-mouse F4/80 CD11b antibody (Clone: BM8, Catalog #: 123132, Biolegend, USA)  
532 Pacific Blue anti-mouse/human CD11b antibody (Clone: M1/70, Catalog #: 101224, Biolegend,  
533 USA)  
534 BV605 anti-mouse CD11c antibody (Clone: N418, Catalog #: 117334, Biolegend, USA)  
535 PE anti-mouse F4/80 antibody (Clone: QA17A29, Catalog #: 157304, Biolegend, USA)  
536 BV421 anti-mouse CD80 antibody (Clone: 16-10A1, Catalog #: 104726, Biolegend, USA)  
537 FITC anti-mouse CD86 antibody (Clone: PO3, Catalog #: 105110, Biolegend, USA)  
538 APC/Cyanine7 anti-mouse CD86 antibody (GL-1, Catalog #: 105030, Biolegend, USA)  
539 PerCP Cy5.5 anti-mouse CD206 antibody (Clone: C068C2, Catalog #: 141716, Biolegend, USA)  
540 PE-Cy7 anti-mouse SIINFEKL/H-2Kb antibody (Clone: 25-D1.16, Catalog #: 141608, Biolegend,  
541 USA)  
542 APC anti-mouse SIINFEKL/H-2Kb antibody (Clone: 25-D1.16, Catalog #: 141606, Biolegend,  
543 USA)  
544 BV421 anti-mouse CD62L antibody (Clone: MEL-14, Catalog #: 104436, Biolegend, USA)  
545 PerCP Cy5.5 anti-mouse CD44 antibody (Clone: IM7, Catalog #: 103032, Biolegend, USA)  
546 PE anti-mouse CD3 antibody (Clone: 17A2, Catalog #: 100206, Biolegend, USA)  
547 BV650 anti-mouse CD8a antibody (Clone: 53-6.7, Catalog #: 100742, Biolegend, USA)  
548 BV785 anti-mouse CD4 antibody (Clone: GK1.5, Catalog #: 100453, Biolegend, USA)  
549 Alexa Fluor488 anti-mouse Foxp3 (Clone: 150D, Catalog #: 320012, Biolegend, USA)  
550 BV605 anti-mouse IFN- $\gamma$  antibody (Clone: 4S.B3, Catalog #: 505832, Biolegend, USA)  
551 BV510 anti-mouse Ly-6G/Ly-6C (Gr-1) antibody (Clone: RB6-8C5, Catalog #:108438, Biolegend,  
552 USA)  
553 BV421 anti-mouse CD25 antibody (Clone: 3C7, Catalog #: 101923, Biolegend, USA)  
554 BV785 anti-mouse I-A/I-E antibody (Clone: M5/114.15.2, Catalog #: 107645, Biolegend, USA)  
555 BV650 anti-mouse NK1.1. antibody (Clone: PK136, Catalog #:108736, Biolegend, USA)  
556 BV421 anti-mouse NKp46 antibody (Clone: 29A.4, Catalog #: 137612, Biolegend, USA)  
557 Tetramer/BV421-H2Kb OVA (SIINFEKL) (Catalog #: TB-5001-4, MBL International Corporation,  
558 USA)

559 **Antibodies used for western blotting and immunofluorescence staining**  
560 CHOP (L63F7) Mouse mAb #2895 (Cell Signaling Technology, USA)  
561 p-eIF2 $\alpha$  (Ser51) (D9G8) XP<sup>®</sup> Rabbit mAb #3398 (Cell Signaling Technology, USA)  
562 eIF2 $\alpha$  (D7D3) XP<sup>®</sup> Rabbit mAb #5324 (Cell Signaling Technology, USA)  
563 BiP (C50B12) Rabbit mAb #3177 (Cell Signaling Technology, USA)  
564 XBP-1 (ERP22004) Rabbit mAb ab220783 (abcam, UK)  
565 NF- $\kappa$ B p65 (D14E12) Rabbit mAb #8242 (Cell Signaling Technology, USA)  
566 p-NF- $\kappa$ B p65 (Ser536) (93H1) Rabbit mAb #3033 (Cell Signaling Technology, USA)  
567 IKK $\beta$  (D30C6) Rabbit mAb #8943 (Cell Signaling Technology, USA)  
568 p-IKK $\alpha/\beta$  (Ser176/180) (16A6) Rabbit mAb #2697 (Cell Signaling Technology, USA)  
569 IKK $\alpha$  (3G12) Mouse mAb #11930 (Cell Signaling Technology, USA)  
570 I $\kappa$ B $\alpha$  (L35A5) Mouse mAb (Amino-terminal Antigen) #4814 (Cell Signaling Technology, USA)  
571 p-I $\kappa$ B $\alpha$  (Ser32) (14D4) Rabbit mAb #2859 (Cell Signaling Technology, USA)  
572  $\beta$ -actin Rabbit pAb #4967 (Cell Signaling Technology, USA)  
573 MyD88 Rabbit mAb #4283 (Cell Signaling Technology, USA)  
574 IRF3 (D83B9) Rabbit mAb #4302 (Cell Signaling Technology, USA)  
575 p-IRF3 (Ser396) (D6O1M) Rabbit mAb #29047 (Cell Signaling Technology, USA)  
576 IRF7 (D8V1J) Rabbit mAb #72073 (Cell Signaling Technology, USA)  
577 p-IRF7 (Ser437/438) (D6M2I) Rabbit mAb #24129 (Cell Signaling Technology, USA)  
578 p-STING (Ser366) pAb PA5-105674 (ThermoFisher Scientific, USA)  
579 STING (D2P2F) Rabbit mAb #13647 (Cell Signaling Technology, USA)  
580 STING Rabbit pAb PA5-23381 (ThermoFisher Scientific, USA)  
581 Vinculin Recombinant Rabbit mAb (42H89L44) 700062 (ThermoFisher Scientific, USA)  
582 TFAM (Transcription Factor A, Mitochondrial) antibody Rabbit pAb H00007019-B01P (Abnova,  
583 USA)  
584 Anti-dsDNA antibody Mouse mAb CBL186MI (MilliporeSigma<sup>™</sup>, USA)  
585 Tom20 (D8T4N) Rabbit mAb #42406 (Cell Signaling Technology, USA)  
586 Purified anti-mouse CD8a (Catalog No. 100702) (Biolegend, USA)  
587 Anti-Iba1 antibody (ab5076) (abcam, UK)  
588 Anti-F4/80 antibody [Cl:A3-1] - Macrophage Marker (ab6640) (abcam, UK)  
589 FITC-tagged Goat anti-rabbit secondary Ab (ThermoFisher Scientific, USA)  
590 FITC-tagged Donkey anti-mouse secondary Ab (ThermoFisher Scientific, USA)

591 Alexa Fluor 647-tagged Goat anti-rabbit secondary Ab (ThermoFisher Scientific, USA)  
592 Alexa Fluor 546-tagged Goat anti-rat secondary Ab (Biolegend, USA)  
593 Purified anti-mouse CD8a Antibody (Biolegend, USA)  
594 CD4 (RM4-5) Rat mAb (FITC Conjugate) #96127 (Cell Signaling Technology, USA)  
595 CD11c Monoclonal Antibody (N418), eBioscience™ # 14-0114-82 (ThermoFisher Scientific,  
596 USA)  
597 p-IRF7 (Ser471, Ser472) Polyclonal antibody # PA5-114592 (ThermoFisher Scientific USA)  
598 CD11c Monoclonal Antibody (N418), Functional Grade, eBioscience™ # 16-0114-85  
599 (ThermoFisher Scientific, USA)  
600 Anti-TRIF antibody (ab13810) (abcam, UK)  
601 Anti-TLR3 antibody (ab137722) (abcam, UK)  
602 NLRP3 (D4D8T) Rabbit mAb #15101 (Cell Signaling Technology, USA)  
603 Caspase-1 (E2Z1C) Rabbit mAb #24232 (Cell Signaling Technology, USA)  
604 Cleaved Caspase-1 (Asp296) (E2G2I) Rabbit mAb #89332 (Cell Signaling Technology, USA)  
605 Purified anti-mouse CD8b.2 Antibody #140402 (Biolegend, USA)  
606  $\beta$ -Actin (13E5) Rabbit mAb #4970 (Cell Signaling Technology, USA)  
607  
608 **Antibody list for *in vivo* study**  
609 *InVivoMAb* anti-mouse PD1 (CD279) #BE0273 (BioXcell, USA)  
610 *InVivoMAb* anti-mouse CD8 $\alpha$  #BE0117 (BioXcell, USA)  
611 *InVivoMAb* anti-mouse CSF1 #BE0204 (BioXcell, USA)  
612  
613 **ELISA kits**  
614 Mouse TNF- $\alpha$  (ELISA MAX™ Deluxe Set Mouse TNF- $\alpha$ , Biolegend, USA)  
615 Mouse IL-1 $\beta$  (ELISA MAX™ Deluxe Set Mouse IL-1 $\beta$ , Biolegend, USA)  
616 IL-6 (ELISA MAX™ Deluxe Set Mouse IL-6, Biolegend, USA)  
617 Mouse IFN- $\alpha$  (IFN alpha Mouse ELISA Kit (Invitrogen, USA)  
618 Mouse IFN-  $\beta$  (Mouse IFN-beta DuoSet ELISA, R&D systems, USA)  
619 Mouse IFN- $\gamma$  (ELISA MAX™ Deluxe Set Mouse IFN- $\gamma$ , Biolegend, USA)  
620 Mouse IL-2 (ELISA MAX™ Deluxe Set Mouse IL-2, Biolegend, USA)  
621 Mouse HMGB1 (Mouse HMGB1 ELISA kit LS-F11642-1, LSBio, USA)
